# Supplementary material for: PKN2 deficiency leads both to prenatal ‘congenital’ cardiomyopathy and defective angiotensin II stress responses
Source: Oxford University Press journal article supplement (doi:10.1042/bcj20220281), 2022-06-22
Supplement: bcj-2022-0281_supp.pdf [file bcj-2022-0281_supp.pdf]

XMLC2Cre<sup>+/+</sup>  
PKN2fl<sup>+/+</sup>

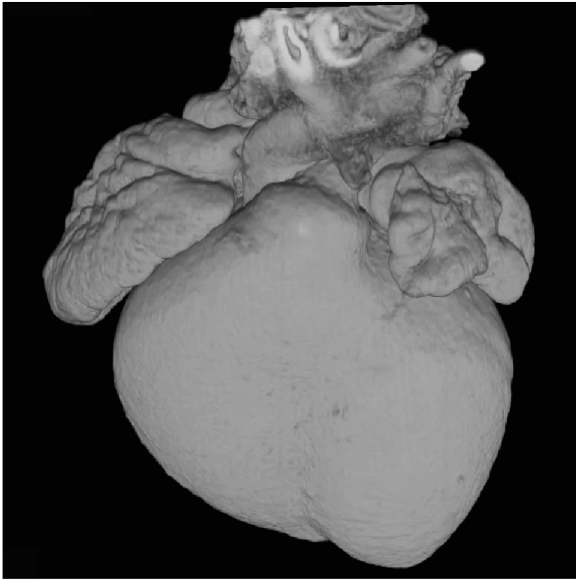

XMLC2Cre<sup>-/-</sup>  
PKN2fl<sup>fl/fl</sup>

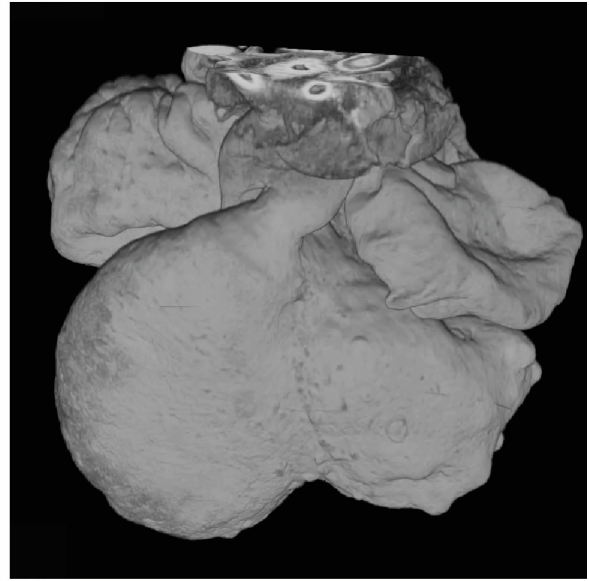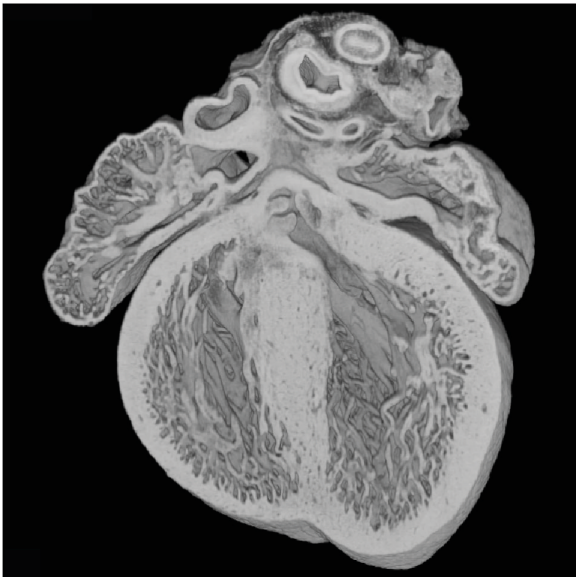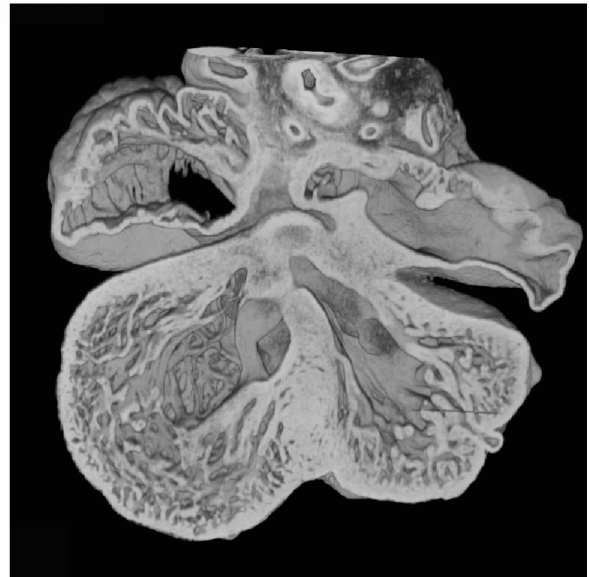

**Figure S1. HREM images of XMLC2 knockout of Pkn2**

HREM images are from a reconstruction of a 14.5d XMLC2Cre<sup>+/+</sup> Pkn2<sup>fl/+</sup> embryo (left) and of a XMLC2Cre<sup>-/-</sup> Pkn2<sup>fl/fl</sup> (right) from the same dam. The upper panels are surface images and the lower panels illustrate sections.

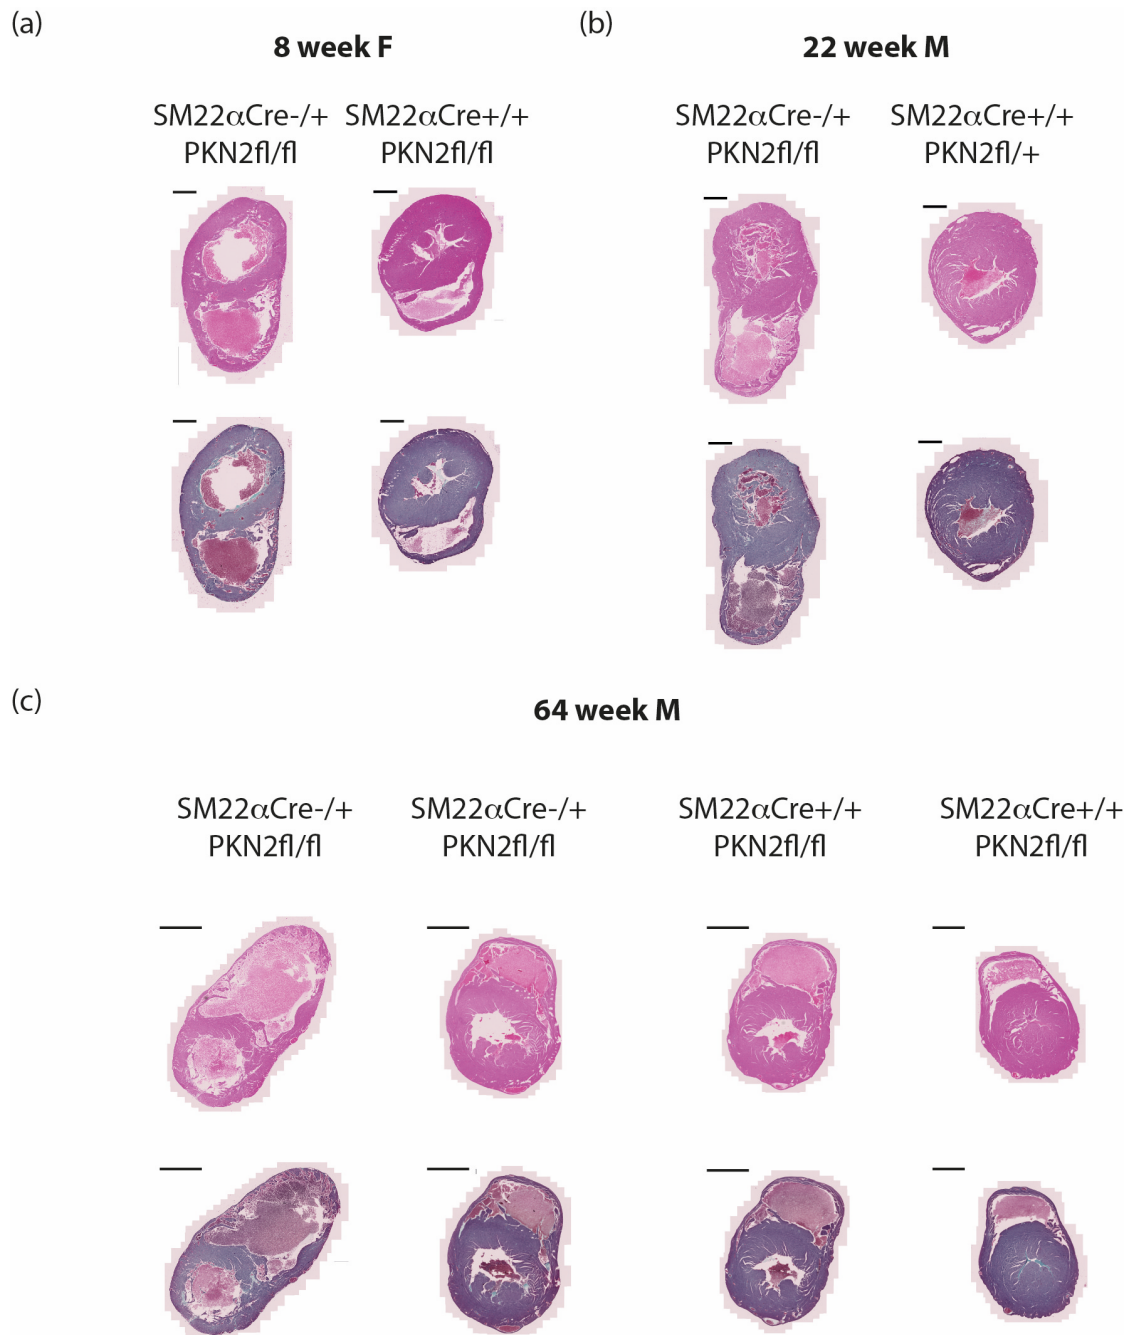

**Figure S2. Histology of sections from the SM22 $\alpha$  knockout of Pkn2 in adult hearts**

H&E (top rows) and Gomori's Trichrome (lower rows) stained sections through the short-axis of the heart, at 2-3 mm from the apex from littermates of (a) females culled at 8 weeks of age, (b) males at 22 weeks, and (c) males at 64 weeks, with genotypes as labelled. For each group, cull was triggered due to loss of condition of one littermate (left in each group). Scale bars are (a,b) 1 mm or (c) 2 mm.

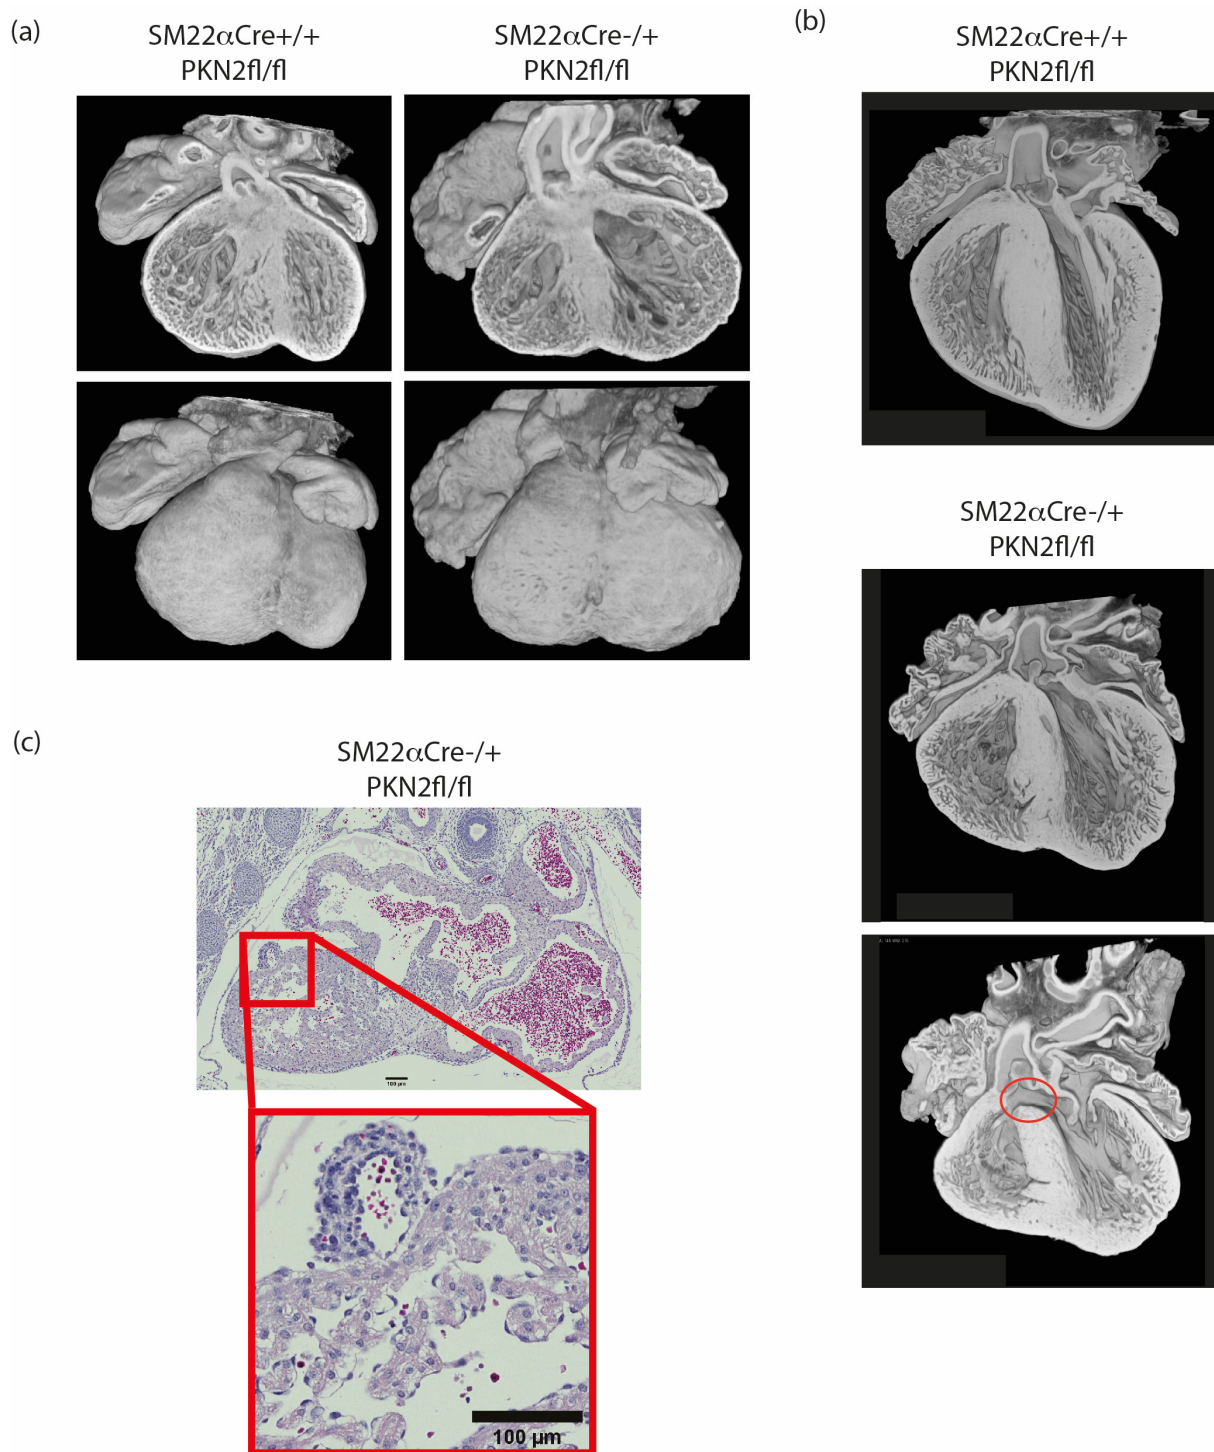

**Figure S3 Embryonic defects SM22 $\alpha$  Pkn2 mice**

HREM images are from reconstructions of embryos collected at (a) E14.5 and (b) E18.5 days gestation. Genotypes are as indicated. (c) H&E stained section of a SM22 $\alpha$ Cre<sup>+/-</sup> Pkn2<sup>fl/fl</sup> E14.5 heart with 100  $\mu$ m scale, as labelled.

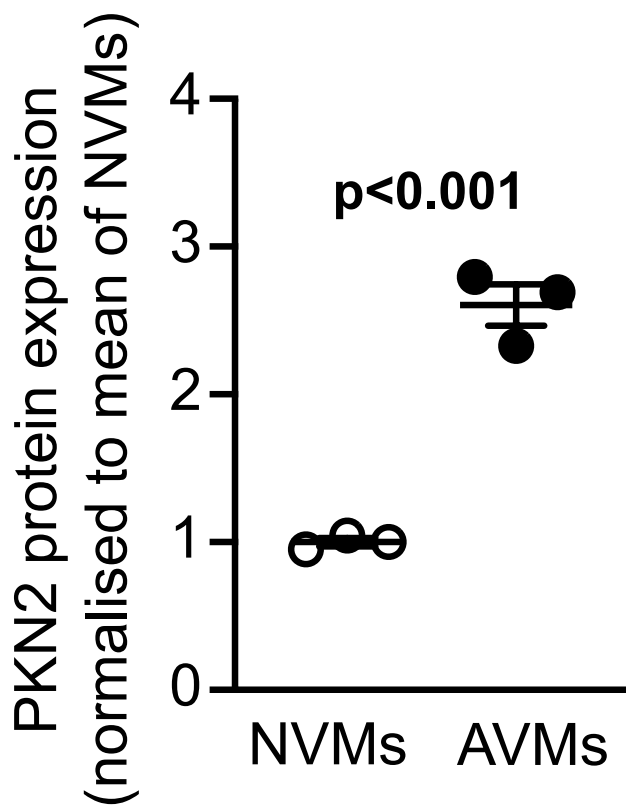

**Figure S4. Expression of PKN2 in neonatal rat ventricular myocytes (NVMs) compared with adult rat ventricular myocytes (AVMs) relative to cell size.** Expression data were from Fuller SJ et al. (Cardiovasc Res. 2015; 108: 87-98) adjusted for cell size according to membrane capacitance which increases from 13 pF in 1- to 2-day NVMs to 156 pF in AVMs [60, 61].

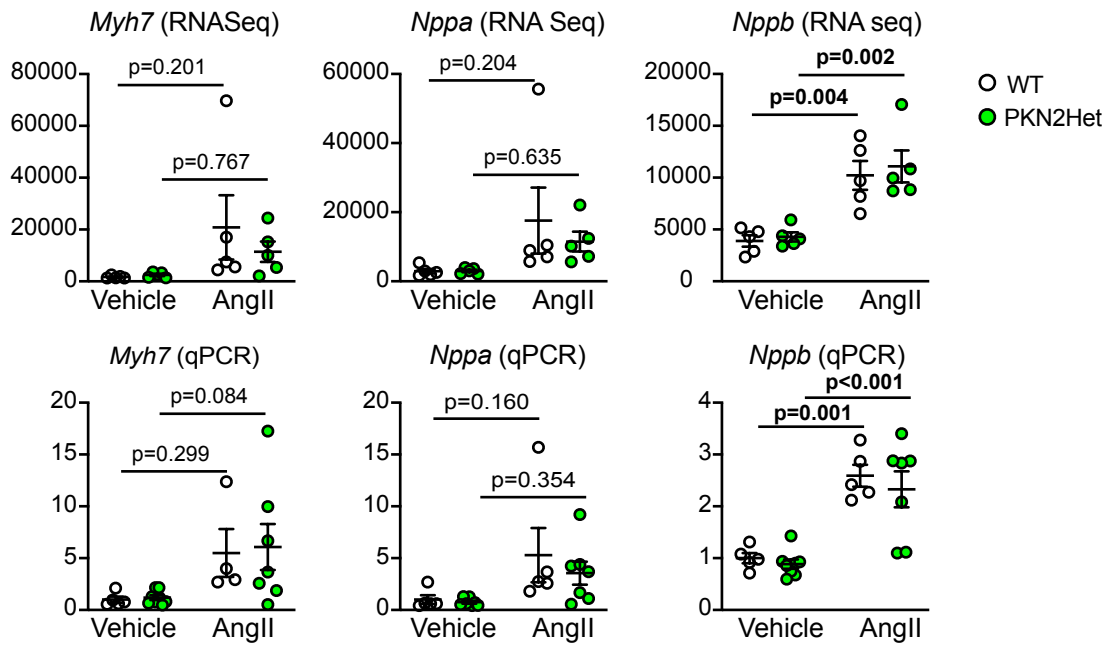

**Figure S5. Expression of hypertrophy associated genes in hearts from WT or Pkn2Het mice.** WT (white) or Pkn2Het (green) mice were treated with vehicle (left side of each graph) or AngII (0.8 mg/kg/d; right side of each graph) for 7 d. RNA was prepared and used for RNASeq (upper panels) or qPCR (lower panels). Individual data points are shown with means  $\pm$  SEM. Analysis used 2-way ANOVA with Holm-Sidak's post-test.

**Supplementary Table S1. Echocardiography data for 12 and 42 week male mice with heterozygous PKN2 gene deletion (PKN2Het) and wild-type (WT) mice: baseline data.** AAT, aortic acceleration time; AET, Aortic expulsion time; VTI, velocity time interval; PAT, pulmonary acceleration time; PET, pulmonary expulsion time; PA, pulmonary artery; LV, left ventricle; ID, internal diameter; AW, anterior wall; PW, posterior wall.

|                                                                              | WT: 12 wk (n=10) |       | PKN2Het: 12 wk (n=15) |       | WT: 42 wk (n=8) |       | PKN2Het: 42 wk (n=10) |        |
|------------------------------------------------------------------------------|------------------|-------|-----------------------|-------|-----------------|-------|-----------------------|--------|
|                                                                              | Mean             | SEM   | Mean                  | SEM   | Mean            | SEM   | Mean                  | SEM    |
| <b>Aortic flow (Pulsed Wave Doppler)</b>                                     |                  |       |                       |       |                 |       |                       |        |
| AAT (ms)                                                                     | 23.80            | 0.82  | 23.59                 | 0.72  | 18.98           | 0.72  | 20.03                 | 1.08   |
| AET (ms)                                                                     | 57.21            | 0.68  | 56.55                 | 0.68  | 48.54           | 1.13  | 53.56                 | 1.77   |
| AAT/AET                                                                      | 0.42             | 0.01  | 0.42                  | 0.01  | 0.39            | 0.01  | 0.37                  | 0.01   |
| Aorta VTI (mm)                                                               | 61.95            | 2.47  | 60.71                 | 2.86  | 40.31           | 3.09  | 55.47                 | 3.77   |
| Aorta Mean Velocity (mm/s)                                                   | 821.32           | 29.33 | 800.96                | 29.24 | 620.71          | 36.58 | 800.88                | 54.81  |
| Aorta Mean Gradient (mmHg)                                                   | 2.81             | 0.23  | 2.65                  | 0.19  | 1.59            | 0.18  | 2.69                  | 0.33   |
| Aorta Peak Velocity (mm/s)                                                   | 1632.92          | 58.53 | 1592.77               | 53.01 | 1271.29         | 82.00 | 1620.63               | 104.77 |
| Aorta Peak Grad (mmHg)                                                       | 11.08            | 0.93  | 10.46                 | 0.65  | 6.69            | 0.83  | 10.94                 | 1.32   |
| Aorta Peak Pressure (mmHg)                                                   | 10.85            | 0.86  | 10.31                 | 0.65  | 6.64            | 0.82  | 10.81                 | 1.31   |
| <b>Pulmonary flow (Pulsed Wave Doppler)</b>                                  |                  |       |                       |       |                 |       |                       |        |
| PAT (ms)                                                                     | 23.71            | 0.53  | 24.90                 | 0.37  | 24.97           | 0.98  | 24.71                 | 0.72   |
| PET (ms)                                                                     | 60.47            | 0.92  | 61.43                 | 0.65  | 56.74           | 2.15  | 58.94                 | 2.42   |
| PAT/PET                                                                      | 0.39             | 0.01  | 0.41                  | 0.00  | 0.44            | 0.02  | 0.42                  | 0.01   |
| PA VTI                                                                       | 32.11            | 1.12  | 32.70                 | 0.58  | 20.66           | 1.20  | 21.44                 | 0.97   |
| PA Mean Velocity (mm/s)                                                      | -369.58          | 10.38 | -360.73               | 12.93 | -262.10         | 8.32  | -264.84               | 9.79   |
| PA Mean Gradient (mmHg)                                                      | 0.56             | 0.03  | 0.56                  | 0.02  | 0.28            | 0.02  | 0.29                  | 0.02   |
| PA Peak Velocity (mm/s)                                                      | -764.05          | 17.63 | -740.28               | 23.98 | -551.01         | 13.94 | -558.99               | 25.85  |
| PA Peak Grad (mmHg)                                                          | 2.37             | 0.11  | 2.36                  | 0.08  | 1.22            | 0.06  | 1.28                  | 0.12   |
| <b>Aorta diameter (B-Mode)</b>                                               |                  |       |                       |       |                 |       |                       |        |
| Widest (mm)                                                                  | 1.51             | 0.01  | 1.54                  | 0.02  | 1.59            | 0.03  | 1.60                  | 0.03   |
| Narrowest (mm)                                                               | 1.28             | 0.02  | 1.29                  | 0.02  | 1.47            | 0.04  | 1.44                  | 0.04   |
| Wide/narrow                                                                  | 1.20             | 0.01  | 1.19                  | 0.01  | 1.08            | 0.01  | 1.11                  | 0.02   |
| <b>Left ventricle dimensions (short axis M-mode)</b>                         |                  |       |                       |       |                 |       |                       |        |
| Heart Rate (bpm)                                                             | 522.13           | 11.06 | 508.26                | 11.26 | 473.62          | 17.63 | 448.95                | 18.55  |
| LVID;s (mm)                                                                  | 2.97             | 0.05  | 2.92                  | 0.05  | 2.59            | 0.07  | 2.71                  | 0.05   |
| LVID;d (mm)                                                                  | 4.18             | 0.05  | 4.14                  | 0.05  | 3.80            | 0.06  | 3.95                  | 0.04   |
| LVAW;s (mm)                                                                  | 1.11             | 0.02  | 1.05                  | 0.01  | 1.10            | 0.04  | 1.07                  | 0.03   |
| LVAW;d (mm)                                                                  | 0.84             | 0.02  | 0.77                  | 0.01  | 0.84            | 0.02  | 0.81                  | 0.02   |
| LVPW;s (mm)                                                                  | 1.03             | 0.03  | 1.01                  | 0.02  | 1.16            | 0.03  | 1.11                  | 0.05   |
| LVPW;d (mm)                                                                  | 0.72             | 0.02  | 0.69                  | 0.01  | 0.78            | 0.04  | 0.77                  | 0.02   |
| <b>Cardiac function (speckle-tracking strain analysis; long axis B-mode)</b> |                  |       |                       |       |                 |       |                       |        |
| Heart rate (bpm)                                                             | 502.23           | 10.29 | 487.39                | 10.63 | 459.97          | 22.21 | 460.58                | 22.49  |
| Stroke volume (µl)                                                           | 25.51            | 1.35  | 26.23                 | 0.76  | 24.18           | 2.71  | 24.17                 | 2.51   |
| Fractional shortening (%)                                                    | 26.85            | 0.76  | 28.45                 | 0.85  | 28.04           | 1.43  | 29.33                 | 2.73   |
| Ejection fraction (%)                                                        | 50.11            | 1.93  | 53.31                 | 1.20  | 53.38           | 2.76  | 54.07                 | 2.95   |
| Cardiac output (ml/min)                                                      | 12.76            | 0.59  | 12.79                 | 0.49  | 10.94           | 1.10  | 11.01                 | 1.04   |
| End diastolic LV mass                                                        | 53.48            | 1.45  | 49.95                 | 0.88  | 64.83           | 4.30  | 66.52                 | 2.59   |
| End systolic LV mass                                                         | 56.46            | 1.57  | 52.34                 | 0.75  | 66.08           | 4.28  | 67.84                 | 2.70   |

**Supplementary Table S2. Echocardiography data for 12 week male mice with heterozygous PKN2 gene deletion (PKN2Het) and wild-type (WT) mice treated for 7 d with 0.8 mg/kg/d angiotensin 2 or vehicle.** AAT, aortic acceleration time; AET, Aortic expulsion time; VTI, velocity time interval; PAT, pulmonary acceleration time; PET, pulmonary expulsion time; PA, pulmonary artery; LV, left ventricle; ID, internal diameter; AW, anterior wall; PW, posterior wall.

|                                                                              | WT: vehicle (n=5) |        | PKN2Het: vehicle (n=8) |        | WT: AngII (n=5) |       | PKN2Het: AngII (n=7) |       |
|------------------------------------------------------------------------------|-------------------|--------|------------------------|--------|-----------------|-------|----------------------|-------|
|                                                                              | Mean              | SEM    | Mean                   | SEM    | Mean            | SEM   | Mean                 | SEM   |
| <b>Aortic flow (Pulsed Wave Doppler)</b>                                     |                   |        |                        |        |                 |       |                      |       |
| AAT (ms)                                                                     | 23.50             | 1.19   | 22.76                  | 0.86   | 24.42           | 1.23  | 22.53                | 1.44  |
| AET (ms)                                                                     | 57.71             | 1.57   | 55.21                  | 1.39   | 56.29           | 1.65  | 54.49                | 1.23  |
| AAT/AET                                                                      | 0.41              | 0.03   | 0.41                   | 0.01   | 0.43            | 0.02  | 0.41                 | 0.02  |
| Aorta VTI (mm)                                                               | 61.67             | 5.44   | 58.84                  | 4.05   | 58.82           | 3.16  | 61.60                | 5.13  |
| Aorta Mean Velocity (mm/s)                                                   | 780.00            | 63.10  | 819.21                 | 59.70  | 811.40          | 45.61 | 864.12               | 57.41 |
| Aorta Mean Gradient (mmHg)                                                   | 2.53              | 0.41   | 2.80                   | 0.37   | 2.68            | 0.30  | 3.08                 | 0.42  |
| Aorta Peak Velocity (mm/s)                                                   | 1583.20           | 128.93 | 1607.53                | 109.14 | 1498.86         | 29.58 | 1689.25              | 81.15 |
| Aorta Peak Grad (mmHg)                                                       | 10.32             | 1.68   | 10.71                  | 1.32   | 9.01            | 0.35  | 11.60                | 1.08  |
| Aorta Peak Pressure (mmHg)                                                   | 10.20             | 1.68   | 10.61                  | 1.30   | 8.91            | 0.35  | 11.50                | 1.09  |
| <b>Pulmonary flow (Pulsed Wave Doppler)</b>                                  |                   |        |                        |        |                 |       |                      |       |
| PAT (ms)                                                                     | 26.13             | 1.02   | 25.44                  | 1.09   | 24.54           | 0.58  | 22.71                | 1.25  |
| PET (ms)                                                                     | 62.38             | 1.29   | 63.13                  | 1.47   | 58.68           | 2.93  | 56.67                | 1.72  |
| PAT/PET                                                                      | 0.42              | 0.01   | 0.40                   | 0.01   | 0.42            | 0.02  | 0.40                 | 0.02  |
| PA VTI                                                                       | 31.66             | 1.74   | 31.73                  | 1.05   | 28.44           | 2.24  | 25.39                | 1.39  |
| PA Mean Velocity (mm/s)                                                      | -362.61           | 16.48  | -363.12                | 13.26  | -333.86         | 18.50 | -310.38              | 10.82 |
| PA Mean Gradient (mmHg)                                                      | 0.53              | 0.05   | 0.53                   | 0.04   | 0.45            | 0.05  | 0.39                 | 0.03  |
| PA Peak Velocity (mm/s)                                                      | -755.55           | 28.94  | -744.09                | 26.15  | -704.73         | 33.94 | -682.22              | 25.60 |
| PA Peak Grad (mmHg)                                                          | 2.30              | 0.18   | 2.24                   | 0.16   | 2.01            | 0.20  | 1.88                 | 0.14  |
| <b>Aorta diameter (B-Mode)</b>                                               |                   |        |                        |        |                 |       |                      |       |
| Widest (mm)                                                                  | 1.51              | 0.02   | 1.51                   | 0.01   | 1.63            | 0.06  | 1.69                 | 0.08  |
| Narrowest (mm)                                                               | 1.21              | 0.02   | 1.27                   | 0.03   | 1.44            | 0.09  | 1.56                 | 0.09  |
| Wide/narrow                                                                  | 1.24              | 0.02   | 1.19                   | 0.03   | 1.14            | 0.04  | 1.09                 | 0.01  |
| <b>Left ventricle dimensions (short axis M-mode)</b>                         |                   |        |                        |        |                 |       |                      |       |
| Heart Rate (bpm)                                                             | 501.28            | 13.71  | 506.12                 | 12.71  | 528.57          | 15.67 | 521.25               | 17.10 |
| LVID;s (mm)                                                                  | 2.96              | 0.11   | 3.01                   | 0.07   | 2.59            | 0.08  | 2.68                 | 0.11  |
| LVID;d (mm)                                                                  | 4.17              | 0.10   | 4.15                   | 0.05   | 3.86            | 0.13  | 3.80                 | 0.14  |
| LVAW;s (mm)                                                                  | 1.08              | 0.04   | 1.07                   | 0.01   | 1.29            | 0.06  | 1.15                 | 0.02  |
| LVAW;d (mm)                                                                  | 0.82              | 0.03   | 0.81                   | 0.02   | 1.00            | 0.05  | 0.91                 | 0.02  |
| LVPW;s (mm)                                                                  | 1.03              | 0.06   | 1.02                   | 0.03   | 1.31            | 0.07  | 1.18                 | 0.02  |
| LVPW;d (mm)                                                                  | 0.72              | 0.05   | 0.72                   | 0.03   | 1.02            | 0.09  | 0.85                 | 0.04  |
| <b>Cardiac function (speckle-tracking strain analysis; long axis B-mode)</b> |                   |        |                        |        |                 |       |                      |       |
| Heart rate (bpm)                                                             | 462.84            | 9.65   | 503.48                 | 16.63  | 525.26          | 14.72 | 512.86               | 19.44 |
| Stroke volume (µl)                                                           | 28.52             | 2.63   | 28.07                  | 1.03   | 27.49           | 3.19  | 21.12                | 2.08  |
| Fractional shortening (%)                                                    | 24.54             | 1.58   | 27.42                  | 1.62   | 33.15           | 2.06  | 25.56                | 1.69  |
| Ejection fraction (%)                                                        | 49.85             | 1.59   | 53.86                  | 1.99   | 60.29           | 3.22  | 52.70                | 1.28  |
| Cardiac output (ml/min)                                                      | 13.21             | 1.31   | 14.22                  | 0.90   | 14.41           | 1.70  | 10.68                | 0.90  |
| End diastolic LV mass                                                        | 54.15             | 4.23   | 51.75                  | 2.14   | 71.11           | 5.80  | 54.44                | 4.21  |
| End systolic LV mass                                                         | 57.33             | 5.02   | 56.87                  | 2.64   | 76.33           | 5.51  | 57.72                | 4.56  |

**Supplementary Table S3.** RNASeq analysis of effects of angiotensin II (AngII) on mRNA expression in hearts from PKN2Het vs WT littermates: mRNAs significantly upregulated by AngII in PKN2Het or WT hearts.

| Gene Symbol   | Ensembl gene id     | WT Vehicle |      | WT AngII |       | PKN2Het Vehicle |      | PKN2Het AngII |       |
|---------------|---------------------|------------|------|----------|-------|-----------------|------|---------------|-------|
|               |                     | Mean       | SD   | Mean     | SD    | Mean            | SD   | Mean          | SD    |
| Sept5         | ENSMUSG00000072214  | 83         | 20   | 175      | 64    | 94              | 15   | 166           | 50    |
| Sept9         | ENSMUSG00000059248  | 865        | 99   | 1148     | 72    | 882             | 89   | 1148          | 182   |
| Sept11        | ENSMUSG00000058013  | 781        | 129  | 1170     | 161   | 705             | 99   | 998           | 196   |
| 150009L16Rik  | ENSMUSG00000087651  | 50         | 8    | 89       | 32    | 43              | 11   | 85            | 10    |
| 1700120C14Rik | ENSMUSG00000100599  | 84         | 4    | 153      | 41    | 76              | 23   | 122           | 23    |
| 2010111I01Rik | ENSMUSG00000021458  | 946        | 73   | 1185     | 106   | 902             | 74   | 1185          | 115   |
| Abcg1         | ENSMUSG00000024030  | 121        | 26   | 192      | 24    | 107             | 25   | 163           | 40    |
| Acan          | ENSMUSG00000030607  | 4          | 3    | 66       | 49    | 3               | 1    | 32            | 34    |
| Ace           | ENSMUSG00000020681  | 1467       | 152  | 2473     | 345   | 1594            | 190  | 2408          | 305   |
| Acta1         | ENSMUSG00000031972  | 6773       | 1395 | 24772    | 10833 | 8570            | 3863 | 28601         | 14894 |
| Actn1         | ENSMUSG00000015143  | 522        | 79   | 925      | 273   | 524             | 61   | 761           | 132   |
| Actr3         | ENSMUSG00000026341  | 2536       | 120  | 3001     | 264   | 2399            | 43   | 2908          | 199   |
| Adam12        | ENSMUSG00000054555  | 55         | 9    | 167      | 53    | 41              | 13   | 115           | 49    |
| Adam15        | ENSMUSG00000028041  | 1010       | 154  | 1434     | 80    | 997             | 96   | 1364          | 151   |
| Adamts12      | ENSMUSG00000047497  | 91         | 12   | 261      | 100   | 100             | 8    | 204           | 80    |
| Adamts2       | ENSMUSG00000036545  | 499        | 49   | 1369     | 604   | 526             | 39   | 1080          | 305   |
| Adamts8       | ENSMUSG00000031994  | 16         | 4    | 76       | 21    | 15              | 2    | 57            | 28    |
| Adamtsl2      | ENSMUSG00000036040  | 230        | 49   | 554      | 141   | 251             | 43   | 511           | 150   |
| Adcy7         | ENSMUSG00000031659  | 355        | 49   | 714      | 204   | 342             | 76   | 589           | 111   |
| Adgre1        | ENSMUSG00000004730  | 375        | 73   | 763      | 304   | 349             | 35   | 608           | 121   |
| AI506816      | ENSMUSG00000105987  | 463        | 36   | 655      | 41    | 454             | 52   | 676           | 86    |
| Aif1          | ENSMUSG00000024397  | 63         | 12   | 133      | 73    | 51              | 11   | 95            | 13    |
| Aldh1a2       | ENSMUSG00000013584  | 143        | 34   | 307      | 88    | 145             | 27   | 322           | 123   |
| Ankrd1        | ENSMUSG00000024803  | 20150      | 6483 | 57246    | 17002 | 19310           | 6244 | 49450         | 10874 |
| Ankrd23       | ENSMUSG00000067653  | 8223       | 1670 | 13521    | 3447  | 9104            | 579  | 14731         | 4085  |
| Anln          | ENSMUSG00000036777  | 56         | 22   | 225      | 55    | 56              | 7    | 174           | 50    |
| Anxa1         | ENSMUSG00000024659  | 596        | 70   | 1111     | 254   | 555             | 84   | 919           | 152   |
| Anxa2         | ENSMUSG00000032231  | 1328       | 74   | 2290     | 204   | 1236            | 149  | 1957          | 280   |
| Anxa5         | ENSMUSG00000027712  | 1991       | 157  | 2628     | 137   | 1995            | 184  | 2495          | 432   |
| Apbb1ip       | ENSMUSG00000026786  | 129        | 14   | 240      | 62    | 146             | 18   | 205           | 16    |
| Apod          | ENSMUSG00000022548  | 115        | 26   | 229      | 22    | 122             | 16   | 198           | 30    |
| Apoe          | ENSMUSG00000002985  | 3788       | 666  | 6913     | 2610  | 4103            | 455  | 5864          | 858   |
| Arhgap1       | ENSMUSG00000027247  | 496        | 38   | 622      | 41    | 520             | 32   | 610           | 36    |
| Arhgap11a     | ENSMUSG000000041219 | 76         | 15   | 183      | 32    | 69              | 9    | 158           | 44    |
| Arhgap30      | ENSMUSG00000048865  | 154        | 24   | 265      | 55    | 147             | 24   | 206           | 37    |
| Arhgdib       | ENSMUSG00000030220  | 506        | 27   | 664      | 56    | 483             | 58   | 627           | 60    |
| Arhgef40      | ENSMUSG00000004562  | 530        | 50   | 747      | 111   | 504             | 59   | 674           | 68    |
| Arid5a        | ENSMUSG00000037447  | 177        | 60   | 315      | 53    | 146             | 28   | 315           | 68    |
| Arl4c         | ENSMUSG00000049866  | 257        | 44   | 447      | 45    | 299             | 36   | 401           | 52    |
| Arl6ip1       | ENSMUSG00000030654  | 555        | 29   | 783      | 95    | 531             | 41   | 675           | 58    |
| Arpc1b        | ENSMUSG00000029622  | 814        | 81   | 1186     | 179   | 737             | 113  | 1071          | 150   |
| Arpc3         | ENSMUSG00000029465  | 1134       | 39   | 1490     | 168   | 1115            | 115  | 1392          | 88    |
| Arpc5         | ENSMUSG00000008475  | 864        | 45   | 1233     | 156   | 871             | 66   | 1121          | 40    |
| Asap2         | ENSMUSG00000052632  | 656        | 118  | 829      | 131   | 621             | 58   | 818           | 121   |
| Aspm          | ENSMUSG00000033952  | 46         | 20   | 147      | 29    | 43              | 10   | 129           | 39    |
| Atad2         | ENSMUSG00000022360  | 124        | 14   | 243      | 23    | 132             | 24   | 212           | 55    |
| Atf4          | ENSMUSG00000042406  | 1171       | 85   | 1374     | 69    | 1169            | 114  | 1319          | 150   |
| Atp10a        | ENSMUSG00000025324  | 58         | 4    | 114      | 20    | 63              | 11   | 98            | 18    |
| Atp8a2        | ENSMUSG00000021983  | 247        | 26   | 365      | 72    | 234             | 36   | 355           | 74    |
| Atp8b1        | ENSMUSG00000039529  | 239        | 30   | 380      | 49    | 213             | 28   | 351           | 75    |
| Aurka         | ENSMUSG00000027496  | 18         | 5    | 51       | 16    | 19              | 6    | 46            | 15    |
| Aurkb         | ENSMUSG00000020897  | 18         | 6    | 47       | 18    | 16              | 5    | 39            | 13    |
| Axl           | ENSMUSG00000002602  | 1982       | 499  | 2556     | 293   | 1813            | 317  | 2326          | 298   |
| B3galnt1      | ENSMUSG00000043300  | 50         | 8    | 82       | 21    | 50              | 8    | 80            | 7     |
| Baspl         | ENSMUSG00000045763  | 41         | 7    | 103      | 33    | 42              | 3    | 76            | 15    |
| BC028528      | ENSMUSG00000038543  | 144        | 14   | 227      | 38    | 130             | 24   | 206           | 24    |
| Bgn           | ENSMUSG00000031375  | 5175       | 520  | 12514    | 5386  | 5152            | 464  | 9491          | 2127  |
| Birc5         | ENSMUSG00000017716  | 20         | 10   | 66       | 13    | 18              | 6    | 66            | 24    |
| Bmp1          | ENSMUSG00000022098  | 505        | 77   | 897      | 297   | 496             | 46   | 796           | 219   |



|         |                     |       |      |       |       |       |     |       |      |
|---------|---------------------|-------|------|-------|-------|-------|-----|-------|------|
| Bub1    | ENSMUSG00000027379  | 12    | 2    | 48    | 14    | 16    | 9   | 44    | 19   |
| Bub1b   | ENSMUSG00000040084  | 41    | 19   | 125   | 41    | 51    | 17  | 103   | 38   |
| C1qa    | ENSMUSG00000036887  | 895   | 96   | 1523  | 250   | 883   | 97  | 1362  | 183  |
| C1qb    | ENSMUSG00000036905  | 826   | 111  | 1513  | 429   | 782   | 128 | 1330  | 245  |
| C1qc    | ENSMUSG00000036896  | 886   | 106  | 1454  | 199   | 845   | 131 | 1290  | 171  |
| C1qtnf6 | ENSMUSG00000022440  | 122   | 21   | 426   | 250   | 120   | 11  | 348   | 107  |
| C4b     | ENSMUSG00000073418  | 231   | 28   | 604   | 141   | 295   | 41  | 861   | 703  |
| Cald1   | ENSMUSG00000029761  | 1649  | 323  | 2616  | 191   | 1624  | 256 | 2205  | 422  |
| Cap1    | ENSMUSG00000028656  | 1199  | 155  | 1633  | 55    | 1115  | 167 | 1503  | 127  |
| Capg    | ENSMUSG00000056737  | 183   | 29   | 364   | 36    | 182   | 36  | 328   | 70   |
| Capza1  | ENSMUSG00000070372  | 1251  | 78   | 1608  | 138   | 1166  | 148 | 1428  | 124  |
| Carhsp1 | ENSMUSG00000008393  | 592   | 69   | 889   | 70    | 517   | 68  | 796   | 96   |
| Casp4   | ENSMUSG00000033538  | 79    | 11   | 119   | 19    | 74    | 18  | 113   | 27   |
| Casp8   | ENSMUSG00000026029  | 191   | 12   | 303   | 44    | 192   | 23  | 274   | 37   |
| Cavin3  | ENSMUSG00000037060  | 300   | 26   | 506   | 43    | 295   | 23  | 430   | 88   |
| Ccdc80  | ENSMUSG00000022665  | 1816  | 295  | 3479  | 1261  | 1843  | 168 | 2847  | 551  |
| Ccl8    | ENSMUSG00000009185  | 11    | 7    | 75    | 31    | 17    | 9   | 73    | 59   |
| Ccna2   | ENSMUSG00000027715  | 65    | 39   | 245   | 89    | 48    | 9   | 184   | 81   |
| Ccnb1   | ENSMUSG00000041431  | 24    | 11   | 73    | 20    | 14    | 4   | 71    | 30   |
| Ccnb2   | ENSMUSG00000032218  | 27    | 10   | 82    | 39    | 18    | 5   | 72    | 21   |
| Cd109   | ENSMUSG00000046186  | 101   | 22   | 257   | 86    | 92    | 18  | 181   | 52   |
| Cd14    | ENSMUSG00000051439  | 89    | 13   | 165   | 34    | 94    | 6   | 143   | 26   |
| Cd248   | ENSMUSG00000056481  | 285   | 55   | 497   | 49    | 278   | 22  | 431   | 86   |
| Cd300c2 | ENSMUSG00000044811  | 33    | 5    | 109   | 72    | 32    | 8   | 66    | 20   |
| Cd300ld | ENSMUSG00000034641  | 151   | 30   | 245   | 51    | 133   | 23  | 238   | 49   |
| Cd34    | ENSMUSG00000016494  | 3352  | 231  | 5107  | 337   | 3106  | 396 | 4820  | 637  |
| Cd44    | ENSMUSG00000005087  | 292   | 53   | 505   | 44    | 273   | 42  | 409   | 82   |
| Cd48    | ENSMUSG00000015355  | 78    | 10   | 145   | 48    | 67    | 12  | 120   | 19   |
| Cd68    | ENSMUSG00000018774  | 205   | 25   | 321   | 48    | 181   | 27  | 308   | 61   |
| Cd72    | ENSMUSG00000028459  | 30    | 9    | 159   | 128   | 27    | 7   | 92    | 56   |
| Cd84    | ENSMUSG00000038147  | 88    | 19   | 178   | 51    | 80    | 9   | 164   | 32   |
| Cd9     | ENSMUSG00000030342  | 590   | 47   | 756   | 24    | 581   | 71  | 670   | 65   |
| Cd93    | ENSMUSG00000027435  | 3708  | 657  | 5435  | 821   | 3856  | 571 | 5157  | 633  |
| Cdc20   | ENSMUSG00000006398  | 28    | 11   | 91    | 19    | 23    | 7   | 80    | 21   |
| Cdca3   | ENSMUSG00000023505  | 16    | 5    | 56    | 20    | 12    | 5   | 59    | 28   |
| Cdca5   | ENSMUSG000000024791 | 5     | 2    | 21    | 8     | 5     | 3   | 21    | 10   |
| Cdca8   | ENSMUSG00000028873  | 14    | 3    | 49    | 5     | 13    | 6   | 38    | 18   |
| Cdk1    | ENSMUSG00000019942  | 33    | 11   | 194   | 49    | 35    | 17  | 130   | 47   |
| Cdkn1a  | ENSMUSG00000023067  | 351   | 153  | 609   | 89    | 367   | 175 | 544   | 152  |
| Cenpe   | ENSMUSG00000045328  | 62    | 41   | 172   | 56    | 38    | 21  | 116   | 38   |
| Cep55   | ENSMUSG00000024989  | 17    | 5    | 63    | 15    | 12    | 2   | 58    | 27   |
| Cfb     | ENSMUSG000000090231 | 36    | 7    | 140   | 61    | 33    | 15  | 114   | 78   |
| Cfl1    | ENSMUSG00000056201  | 2052  | 87   | 2670  | 304   | 1872  | 236 | 2490  | 204  |
| Ch25h   | ENSMUSG00000050370  | 11    | 6    | 32    | 14    | 13    | 5   | 34    | 17   |
| Chd9    | ENSMUSG00000056608  | 1089  | 68   | 1541  | 297   | 1030  | 53  | 1413  | 164  |
| Cilp    | ENSMUSG00000042254  | 294   | 76   | 3092  | 3273  | 401   | 134 | 2249  | 1515 |
| Ckap2   | ENSMUSG00000037725  | 33    | 16   | 131   | 46    | 25    | 5   | 95    | 45   |
| Ckap2l  | ENSMUSG00000048327  | 30    | 10   | 123   | 39    | 25    | 8   | 110   | 29   |
| Ckap4   | ENSMUSG00000046841  | 756   | 159  | 1094  | 75    | 815   | 103 | 1104  | 165  |
| Cks2    | ENSMUSG00000062248  | 13    | 1    | 50    | 13    | 9     | 2   | 35    | 11   |
| Clec4d  | ENSMUSG00000030144  | 9     | 3    | 26    | 14    | 4     | 2   | 18    | 9    |
| Clec4n  | ENSMUSG00000023349  | 32    | 6    | 110   | 48    | 34    | 9   | 86    | 29   |
| Clec5a  | ENSMUSG00000029915  | 57    | 11   | 99    | 10    | 54    | 23  | 89    | 10   |
| Clic1   | ENSMUSG00000007041  | 641   | 18   | 1053  | 159   | 606   | 66  | 943   | 94   |
| Cmtm3   | ENSMUSG00000031875  | 323   | 45   | 510   | 56    | 301   | 38  | 439   | 77   |
| Cnn3    | ENSMUSG00000053931  | 1009  | 125  | 1438  | 123   | 955   | 121 | 1319  | 119  |
| Cnot6   | ENSMUSG00000020362  | 832   | 68   | 999   | 41    | 747   | 64  | 909   | 122  |
| Col12a1 | ENSMUSG00000032332  | 47    | 12   | 495   | 623   | 42    | 10  | 315   | 288  |
| Col14a1 | ENSMUSG00000022371  | 466   | 75   | 1493  | 1179  | 377   | 75  | 1075  | 556  |
| Col15a1 | ENSMUSG00000028339  | 2833  | 383  | 5668  | 1135  | 3175  | 509 | 5335  | 1392 |
| Col18a1 | ENSMUSG00000001435  | 248   | 28   | 790   | 244   | 293   | 35  | 541   | 181  |
| Col3a1  | ENSMUSG00000026043  | 5494  | 744  | 25906 | 20347 | 5871  | 824 | 16747 | 9657 |
| Col4a1  | ENSMUSG00000031502  | 12856 | 2211 | 23909 | 1751  | 13123 | 855 | 20837 | 3837 |
| Col4a2  | ENSMUSG00000031503  | 9490  | 1105 | 15270 | 591   | 9814  | 526 | 14603 | 2361 |
| Col4a4  | ENSMUSG00000067158  | 345   | 73   | 497   | 114   | 364   | 54  | 494   | 37   |
| Col5a1  | ENSMUSG00000026837  | 1205  | 173  | 3410  | 1633  | 1238  | 85  | 2682  | 1054 |
| Col5a2  | ENSMUSG00000026042  | 878   | 65   | 4055  | 3237  | 927   | 105 | 2738  | 1563 |

|          |                    |       |      |       |      |       |      |       |      |
|----------|--------------------|-------|------|-------|------|-------|------|-------|------|
| Col6a1   | ENSMUSG00000001119 | 2071  | 252  | 3943  | 1376 | 2047  | 155  | 3242  | 704  |
| Col6a2   | ENSMUSG00000020241 | 2038  | 291  | 3824  | 981  | 2062  | 139  | 3256  | 743  |
| Col6a3   | ENSMUSG00000048126 | 1170  | 165  | 2685  | 1137 | 1119  | 203  | 1895  | 452  |
| Col8a1   | ENSMUSG00000068196 | 704   | 96   | 3461  | 2170 | 747   | 153  | 2473  | 1081 |
| Cotl1    | ENSMUSG00000031827 | 234   | 40   | 369   | 66   | 208   | 50   | 335   | 22   |
| Creb5    | ENSMUSG00000053007 | 235   | 36   | 347   | 57   | 199   | 28   | 323   | 65   |
| Crip1    | ENSMUSG00000006360 | 686   | 77   | 907   | 72   | 645   | 76   | 846   | 125  |
| Crlf1    | ENSMUSG00000007888 | 11    | 7    | 82    | 61   | 12    | 6    | 50    | 29   |
| Csf1r    | ENSMUSG00000024621 | 1029  | 156  | 1681  | 243  | 1120  | 141  | 1491  | 195  |
| Csrp2    | ENSMUSG00000020186 | 180   | 37   | 542   | 354  | 165   | 20   | 315   | 127  |
| Ctgf     | ENSMUSG00000019997 | 1416  | 407  | 4434  | 1114 | 1381  | 216  | 3773  | 916  |
| Ctla2a   | ENSMUSG00000044258 | 445   | 55   | 611   | 63   | 463   | 136  | 614   | 55   |
| Ctsc     | ENSMUSG00000030560 | 1077  | 100  | 1506  | 162  | 1055  | 115  | 1329  | 214  |
| Ctsz     | ENSMUSG00000016256 | 454   | 61   | 730   | 152  | 421   | 29   | 666   | 78   |
| Cxcl16   | ENSMUSG00000018920 | 209   | 30   | 426   | 208  | 210   | 55   | 332   | 47   |
| Dab2     | ENSMUSG00000022150 | 1262  | 200  | 1666  | 115  | 1122  | 167  | 1571  | 239  |
| Dbn1     | ENSMUSG00000034675 | 170   | 35   | 385   | 71   | 169   | 25   | 330   | 74   |
| Dchs1    | ENSMUSG00000036862 | 677   | 75   | 906   | 45   | 647   | 56   | 875   | 104  |
| Depdc1a  | ENSMUSG00000028175 | 7     | 6    | 46    | 33   | 10    | 5    | 34    | 14   |
| Diaph3   | ENSMUSG00000022021 | 16    | 5    | 59    | 16   | 23    | 10   | 55    | 26   |
| Dio2     | ENSMUSG00000007682 | 59    | 18   | 224   | 44   | 57    | 23   | 165   | 64   |
| Dlgap5   | ENSMUSG00000037544 | 17    | 6    | 48    | 15   | 12    | 6    | 41    | 13   |
| Dpysl3   | ENSMUSG00000024501 | 1022  | 66   | 1824  | 480  | 1008  | 79   | 1535  | 363  |
| Dtl      | ENSMUSG00000037474 | 13    | 10   | 42    | 13   | 12    | 3    | 42    | 11   |
| Dynll1   | ENSMUSG00000009013 | 571   | 82   | 870   | 205  | 474   | 104  | 727   | 130  |
| E2f1     | ENSMUSG00000027490 | 21    | 5    | 59    | 13   | 23    | 8    | 56    | 20   |
| E2f7     | ENSMUSG00000020185 | 42    | 13   | 85    | 32   | 34    | 13   | 79    | 29   |
| Ecm1     | ENSMUSG00000028108 | 452   | 86   | 696   | 127  | 464   | 82   | 720   | 136  |
| Ecsr     | ENSMUSG00000073599 | 254   | 10   | 366   | 51   | 246   | 20   | 337   | 40   |
| Ect2     | ENSMUSG00000027699 | 21    | 8    | 80    | 27   | 24    | 9    | 75    | 24   |
| Edem1    | ENSMUSG00000030104 | 377   | 69   | 588   | 97   | 278   | 84   | 510   | 147  |
| Eef1a1   | ENSMUSG00000037742 | 19836 | 2225 | 28730 | 7994 | 17884 | 2426 | 23968 | 2075 |
| Efh2     | ENSMUSG00000040659 | 427   | 47   | 656   | 180  | 426   | 31   | 620   | 78   |
| Elf4     | ENSMUSG00000031103 | 320   | 62   | 496   | 40   | 293   | 54   | 437   | 22   |
| Emilin1  | ENSMUSG00000029163 | 473   | 106  | 835   | 204  | 519   | 28   | 812   | 91   |
| Emp1     | ENSMUSG00000030208 | 1538  | 159  | 4210  | 1587 | 1504  | 221  | 3295  | 791  |
| Emp3     | ENSMUSG00000040212 | 145   | 17   | 216   | 17   | 152   | 17   | 192   | 12   |
| Enah     | ENSMUSG00000022995 | 2820  | 352  | 4077  | 860  | 3138  | 213  | 4243  | 467  |
| Endod1   | ENSMUSG00000037419 | 225   | 35   | 387   | 85   | 188   | 20   | 328   | 98   |
| Entpd1   | ENSMUSG00000048120 | 473   | 39   | 717   | 165  | 458   | 60   | 637   | 114  |
| Ereg     | ENSMUSG00000029377 | 2     | 1    | 20    | 9    | 2     | 1    | 13    | 5    |
| Esco2    | ENSMUSG00000022034 | 12    | 5    | 43    | 10   | 11    | 6    | 36    | 16   |
| Esyt1    | ENSMUSG00000025366 | 578   | 37   | 738   | 64   | 571   | 38   | 697   | 35   |
| F2r      | ENSMUSG00000048376 | 819   | 41   | 1217  | 181  | 861   | 54   | 1112  | 37   |
| F2rl1    | ENSMUSG00000021678 | 27    | 6    | 56    | 22   | 20    | 7    | 44    | 13   |
| Fads1    | ENSMUSG00000010663 | 476   | 36   | 619   | 11   | 473   | 39   | 586   | 42   |
| Fam111a  | ENSMUSG00000024691 | 311   | 25   | 543   | 98   | 278   | 57   | 446   | 66   |
| Fam114a1 | ENSMUSG00000029185 | 316   | 44   | 511   | 131  | 316   | 48   | 398   | 46   |
| Fam129b  | ENSMUSG00000026796 | 610   | 83   | 785   | 85   | 572   | 21   | 715   | 78   |
| Fam198b  | ENSMUSG00000027955 | 1065  | 183  | 1845  | 423  | 1058  | 202  | 1912  | 390  |
| Fbln2    | ENSMUSG00000064080 | 1827  | 201  | 3200  | 493  | 1966  | 214  | 3008  | 422  |
| Fbn1     | ENSMUSG00000027204 | 2671  | 543  | 7690  | 2514 | 3011  | 303  | 6532  | 2277 |
| Fcgr2b   | ENSMUSG00000026656 | 275   | 47   | 507   | 137  | 255   | 41   | 437   | 94   |
| Fcgr3    | ENSMUSG00000059498 | 355   | 58   | 659   | 143  | 324   | 56   | 543   | 112  |
| Fcgr4    | ENSMUSG00000059089 | 20    | 9    | 70    | 53   | 17    | 3    | 41    | 16   |
| Fcrls    | ENSMUSG00000015852 | 197   | 22   | 463   | 184  | 186   | 29   | 357   | 109  |
| Figl1    | ENSMUSG00000035455 | 26    | 6    | 57    | 22   | 21    | 4    | 51    | 17   |
| Filip11  | ENSMUSG00000043336 | 880   | 82   | 1259  | 105  | 842   | 147  | 1084  | 69   |
| Fkbp10   | ENSMUSG00000001555 | 345   | 47   | 461   | 58   | 288   | 35   | 402   | 56   |
| Flna     | ENSMUSG00000031328 | 4014  | 455  | 5769  | 673  | 3783  | 774  | 4951  | 309  |
| Fmnl3    | ENSMUSG00000023008 | 757   | 91   | 963   | 63   | 730   | 56   | 931   | 86   |
| Fndc1    | ENSMUSG00000071984 | 473   | 60   | 1081  | 567  | 452   | 50   | 911   | 402  |
| Foxm1    | ENSMUSG00000001517 | 42    | 12   | 122   | 30   | 47    | 13   | 101   | 53   |
| Frzb     | ENSMUSG00000027004 | 70    | 18   | 272   | 183  | 82    | 24   | 208   | 55   |
| Fscn1    | ENSMUSG00000029581 | 817   | 47   | 1186  | 92   | 831   | 115  | 1140  | 241  |
| Fstl1    | ENSMUSG00000022816 | 2281  | 246  | 7581  | 4030 | 2354  | 314  | 5589  | 1854 |
| Fstl3    | ENSMUSG00000020325 | 58    | 10   | 114   | 21   | 45    | 10   | 101   | 24   |

|           |                    |      |     |      |      |      |     |      |     |
|-----------|--------------------|------|-----|------|------|------|-----|------|-----|
| Fuca2     | ENSMUSG00000019810 | 4743 | 786 | 5774 | 464  | 4738 | 302 | 6270 | 543 |
| Fxyd5     | ENSMUSG00000009687 | 283  | 49  | 603  | 81   | 271  | 56  | 473  | 80  |
| Gab2      | ENSMUSG00000004508 | 804  | 49  | 1077 | 134  | 805  | 51  | 1017 | 130 |
| Gas2l3    | ENSMUSG00000074802 | 49   | 17  | 117  | 44   | 58   | 17  | 123  | 41  |
| Gdf6      | ENSMUSG00000051279 | 21   | 6   | 60   | 18   | 20   | 4   | 52   | 18  |
| Glipr2    | ENSMUSG00000028480 | 116  | 26  | 213  | 33   | 120  | 25  | 192  | 33  |
| Gm42417   | ENSMUSG00000109510 | 601  | 184 | 1052 | 250  | 572  | 93  | 1085 | 285 |
| Gm47302   | ENSMUSG00000105211 | 24   | 9   | 110  | 97   | 27   | 2   | 68   | 30  |
| Gm4739    | ENSMUSG00000112808 | 128  | 31  | 209  | 69   | 125  | 23  | 223  | 29  |
| Gng2      | ENSMUSG00000043004 | 106  | 30  | 205  | 31   | 90   | 14  | 161  | 60  |
| Gpr153    | ENSMUSG00000042804 | 289  | 39  | 472  | 87   | 284  | 32  | 390  | 64  |
| Gpre5b    | ENSMUSG00000008734 | 417  | 88  | 644  | 60   | 371  | 45  | 622  | 68  |
| Gpx1      | ENSMUSG00000063856 | 1007 | 59  | 1482 | 189  | 1015 | 47  | 1424 | 176 |
| Grb10     | ENSMUSG00000020176 | 1827 | 116 | 2380 | 316  | 1880 | 141 | 2271 | 196 |
| Grn       | ENSMUSG00000034708 | 1349 | 120 | 1891 | 216  | 1368 | 123 | 1853 | 161 |
| Gtse1     | ENSMUSG00000022385 | 12   | 4   | 37   | 7    | 11   | 3   | 35   | 14  |
| Gusb      | ENSMUSG00000025534 | 484  | 36  | 644  | 46   | 462  | 48  | 631  | 40  |
| Haspin    | ENSMUSG00000050107 | 7    | 3   | 26   | 4    | 7    | 2   | 20   | 10  |
| Hcls1     | ENSMUSG00000022831 | 234  | 38  | 352  | 48   | 191  | 20  | 308  | 52  |
| Hectd2os  | ENSMUSG00000087579 | 181  | 28  | 259  | 45   | 192  | 32  | 288  | 75  |
| Hells     | ENSMUSG00000025001 | 29   | 11  | 78   | 18   | 36   | 7   | 79   | 13  |
| Hhipl1    | ENSMUSG00000021260 | 67   | 22  | 127  | 40   | 63   | 22  | 109  | 33  |
| Hist1h2ap | ENSMUSG00000094777 | 37   | 19  | 118  | 39   | 33   | 8   | 97   | 65  |
| Hmmr      | ENSMUSG00000020330 | 21   | 9   | 98   | 40   | 21   | 6   | 82   | 33  |
| Hspal1    | ENSMUSG00000007033 | 134  | 25  | 210  | 54   | 130  | 20  | 216  | 41  |
| Ifi204    | ENSMUSG00000073489 | 206  | 34  | 433  | 95   | 196  | 40  | 334  | 43  |
| Ifi27l2a  | ENSMUSG00000079017 | 237  | 35  | 439  | 84   | 218  | 39  | 420  | 49  |
| Ifitm2    | ENSMUSG00000060591 | 875  | 131 | 1176 | 80   | 841  | 117 | 1097 | 135 |
| Ifitm3    | ENSMUSG00000025492 | 1226 | 258 | 1689 | 136  | 1126 | 147 | 1515 | 182 |
| Ifngr1    | ENSMUSG00000020009 | 1109 | 126 | 1400 | 78   | 1101 | 128 | 1324 | 109 |
| Ift122    | ENSMUSG00000030323 | 278  | 32  | 496  | 94   | 309  | 39  | 488  | 78  |
| Igfbp7    | ENSMUSG00000036256 | 2248 | 254 | 4619 | 1238 | 2198 | 173 | 3722 | 608 |
| Igsf6     | ENSMUSG00000035004 | 49   | 7   | 92   | 27   | 46   | 7   | 79   | 10  |
| Il10ra    | ENSMUSG00000032089 | 138  | 27  | 237  | 86   | 108  | 21  | 194  | 46  |
| Il1rl2    | ENSMUSG00000070942 | 95   | 8   | 139  | 17   | 75   | 7   | 130  | 22  |
| Il2rg     | ENSMUSG00000031304 | 249  | 26  | 354  | 25   | 214  | 37  | 325  | 48  |
| Il4ra     | ENSMUSG00000030748 | 359  | 66  | 598  | 83   | 333  | 48  | 463  | 59  |
| Incenp    | ENSMUSG00000024660 | 92   | 17  | 144  | 29   | 81   | 14  | 144  | 40  |
| Inhba     | ENSMUSG00000041324 | 65   | 15  | 199  | 57   | 61   | 18  | 178  | 55  |
| Iqgap1    | ENSMUSG00000030536 | 1656 | 342 | 2416 | 368  | 1438 | 279 | 2181 | 405 |
| Iqgap3    | ENSMUSG00000028068 | 31   | 20  | 115  | 32   | 27   | 10  | 119  | 46  |
| Irf7      | ENSMUSG00000025498 | 220  | 65  | 413  | 114  | 189  | 26  | 332  | 52  |
| Itga5     | ENSMUSG00000000555 | 986  | 110 | 1409 | 68   | 945  | 123 | 1366 | 142 |
| Itga9     | ENSMUSG00000039115 | 1864 | 139 | 2467 | 423  | 1953 | 131 | 2644 | 386 |
| Itgam     | ENSMUSG00000030786 | 190  | 26  | 365  | 31   | 200  | 68  | 269  | 58  |
| Itih5     | ENSMUSG00000025780 | 368  | 63  | 749  | 273  | 377  | 54  | 597  | 122 |
| Itpripl2  | ENSMUSG00000095115 | 1256 | 118 | 1751 | 114  | 1222 | 89  | 1508 | 115 |
| Kcne4     | ENSMUSG00000047330 | 64   | 17  | 119  | 36   | 59   | 9   | 95   | 7   |
| Kctd11    | ENSMUSG00000046731 | 99   | 17  | 174  | 7    | 96   | 16  | 157  | 31  |
| Kctd17    | ENSMUSG00000033287 | 312  | 32  | 468  | 35   | 317  | 29  | 437  | 78  |
| Kif11     | ENSMUSG00000012443 | 54   | 18  | 219  | 84   | 56   | 14  | 169  | 71  |
| Kif15     | ENSMUSG00000036768 | 14   | 6   | 40   | 11   | 16   | 8   | 57   | 20  |
| Kif18b    | ENSMUSG00000051378 | 13   | 3   | 50   | 17   | 14   | 3   | 49   | 16  |
| Kif20a    | ENSMUSG00000003779 | 45   | 12  | 135  | 43   | 44   | 5   | 120  | 29  |
| Kif22     | ENSMUSG00000030677 | 26   | 8   | 61   | 17   | 19   | 10  | 51   | 20  |
| Kif23     | ENSMUSG00000032254 | 53   | 21  | 153  | 63   | 39   | 12  | 144  | 59  |
| Kif2c     | ENSMUSG00000028678 | 15   | 5   | 39   | 8    | 8    | 2   | 33   | 12  |
| Kif4      | ENSMUSG00000034311 | 35   | 11  | 86   | 21   | 32   | 13  | 86   | 26  |
| Kif5b     | ENSMUSG00000006740 | 4524 | 195 | 5272 | 357  | 4610 | 339 | 5543 | 496 |
| Kifc1     | ENSMUSG00000079553 | 21   | 17  | 44   | 7    | 18   | 7   | 48   | 18  |
| Kn11      | ENSMUSG00000027326 | 29   | 18  | 66   | 14   | 21   | 8   | 59   | 16  |
| Knstrn    | ENSMUSG00000027331 | 28   | 8   | 90   | 28   | 24   | 3   | 76   | 21  |
| Kntc1     | ENSMUSG00000029414 | 13   | 8   | 61   | 43   | 19   | 11  | 63   | 21  |
| Lama4     | ENSMUSG00000019846 | 2464 | 138 | 3226 | 192  | 2291 | 264 | 3050 | 270 |
| Lamb1     | ENSMUSG00000002900 | 2656 | 308 | 3500 | 191  | 2690 | 265 | 3282 | 467 |
| Lamc1     | ENSMUSG00000026478 | 4969 | 490 | 7157 | 380  | 5155 | 283 | 6688 | 486 |
| Laptm5    | ENSMUSG00000028581 | 500  | 82  | 885  | 205  | 478  | 56  | 708  | 122 |

|          |                     |      |      |       |       |      |     |       |      |
|----------|---------------------|------|------|-------|-------|------|-----|-------|------|
| Lcp1     | ENSMUSG00000021998  | 803  | 118  | 1421  | 200   | 781  | 112 | 1229  | 174  |
| Lgals3   | ENSMUSG00000050335  | 56   | 18   | 203   | 128   | 57   | 20  | 148   | 73   |
| Lgals3bp | ENSMUSG00000033880  | 711  | 128  | 1195  | 145   | 721  | 83  | 1079  | 113  |
| Lgals9   | ENSMUSG00000001123  | 575  | 96   | 870   | 73    | 533  | 82  | 766   | 58   |
| Lhfp12   | ENSMUSG00000045312  | 121  | 17   | 351   | 198   | 128  | 21  | 269   | 96   |
| Lilr4b   | ENSMUSG00000112023  | 154  | 32   | 309   | 106   | 138  | 41  | 252   | 97   |
| Litaf    | ENSMUSG00000022500  | 341  | 97   | 525   | 67    | 315  | 74  | 445   | 72   |
| Lman11   | ENSMUSG00000056271  | 6    | 2    | 21    | 5     | 6    | 5   | 23    | 11   |
| Lockd    | ENSMUSG000000098318 | 4    | 4    | 22    | 11    | 5    | 3   | 21    | 12   |
| Loxl1    | ENSMUSG00000032334  | 618  | 97   | 1447  | 604   | 687  | 57  | 1181  | 257  |
| Loxl2    | ENSMUSG00000034205  | 724  | 133  | 1635  | 127   | 683  | 84  | 1403  | 383  |
| Lrp1     | ENSMUSG00000040249  | 4010 | 495  | 5574  | 985   | 4250 | 358 | 5472  | 456  |
| Lrp8     | ENSMUSG00000028613  | 9    | 5    | 40    | 13    | 13   | 7   | 51    | 44   |
| Ly6e     | ENSMUSG00000022587  | 2929 | 530  | 3882  | 293   | 2782 | 305 | 3608  | 375  |
| Ly86     | ENSMUSG00000021423  | 93   | 6    | 221   | 112   | 92   | 20  | 181   | 43   |
| Lyz2     | ENSMUSG00000069516  | 4037 | 355  | 6768  | 1318  | 3852 | 675 | 5981  | 848  |
| Mall     | ENSMUSG00000027377  | 160  | 25   | 233   | 27    | 157  | 20  | 226   | 33   |
| Map1b    | ENSMUSG00000052727  | 582  | 102  | 873   | 51    | 444  | 82  | 777   | 113  |
| Map4k4   | ENSMUSG00000026074  | 3034 | 462  | 3619  | 383   | 2841 | 174 | 3784  | 234  |
| Marcksl1 | ENSMUSG00000047945  | 104  | 18   | 211   | 70    | 107  | 9   | 183   | 4    |
| Masp1    | ENSMUSG00000022887  | 205  | 16   | 307   | 114   | 219  | 36  | 315   | 61   |
| Mcarn    | ENSMUSG00000032135  | 1064 | 99   | 1678  | 301   | 970  | 129 | 1515  | 234  |
| Medag    | ENSMUSG00000029659  | 437  | 58   | 771   | 121   | 486  | 78  | 684   | 41   |
| Melk     | ENSMUSG00000035683  | 19   | 16   | 45    | 19    | 13   | 4   | 40    | 14   |
| Meox1    | ENSMUSG00000001493  | 296  | 46   | 905   | 284   | 323  | 49  | 767   | 246  |
| Mest     | ENSMUSG00000051855  | 193  | 22   | 598   | 325   | 156  | 26  | 417   | 154  |
| Mfap4    | ENSMUSG00000042436  | 202  | 18   | 1249  | 1153  | 245  | 36  | 712   | 324  |
| Mfap5    | ENSMUSG00000030116  | 411  | 43   | 1634  | 1033  | 404  | 45  | 1132  | 430  |
| Mis18bp1 | ENSMUSG00000047534  | 15   | 3    | 59    | 20    | 16   | 6   | 44    | 14   |
| Mki67    | ENSMUSG00000031004  | 305  | 108  | 1186  | 340   | 284  | 62  | 1009  | 362  |
| Mmp2     | ENSMUSG00000031740  | 991  | 124  | 2606  | 1435  | 1013 | 93  | 2013  | 656  |
| Mmp23    | ENSMUSG00000029061  | 80   | 8    | 179   | 97    | 80   | 19  | 146   | 38   |
| Mpp1     | ENSMUSG00000031402  | 302  | 30   | 434   | 51    | 294  | 38  | 387   | 21   |
| Mrc1     | ENSMUSG00000026712  | 1125 | 59   | 1641  | 55    | 1195 | 105 | 1622  | 319  |
| Ms4a6b   | ENSMUSG00000024677  | 163  | 35   | 265   | 79    | 109  | 27  | 237   | 58   |
| Ms4a6c   | ENSMUSG00000079419  | 117  | 24   | 273   | 106   | 108  | 30  | 198   | 50   |
| Msn      | ENSMUSG00000031207  | 4381 | 327  | 6174  | 266   | 4286 | 400 | 5734  | 498  |
| Msr1     | ENSMUSG00000025044  | 91   | 16   | 165   | 30    | 95   | 12  | 158   | 35   |
| Mxd3     | ENSMUSG00000021485  | 3    | 2    | 21    | 8     | 5    | 2   | 23    | 10   |
| Mxra7    | ENSMUSG00000020814  | 353  | 43   | 549   | 114   | 334  | 33  | 485   | 81   |
| Mybl2    | ENSMUSG00000017861  | 12   | 4    | 32    | 11    | 10   | 3   | 29    | 7    |
| Mybpc2   | ENSMUSG00000038670  | 292  | 36   | 901   | 354   | 321  | 110 | 773   | 309  |
| Myh10    | ENSMUSG00000020900  | 964  | 132  | 1462  | 186   | 988  | 96  | 1366  | 213  |
| Myl1     | ENSMUSG00000061816  | 777  | 84   | 1354  | 639   | 674  | 113 | 1186  | 282  |
| Myl6     | ENSMUSG00000090841  | 3039 | 174  | 4606  | 743   | 2959 | 365 | 4098  | 492  |
| Myo1d    | ENSMUSG00000035441  | 367  | 44   | 489   | 47    | 360  | 56  | 474   | 39   |
| Myo1f    | ENSMUSG00000024300  | 97   | 11   | 170   | 34    | 88   | 10  | 163   | 43   |
| Myof     | ENSMUSG00000048612  | 346  | 89   | 640   | 167   | 312  | 56  | 541   | 78   |
| Nbl1     | ENSMUSG00000041120  | 214  | 26   | 349   | 63    | 215  | 19  | 307   | 61   |
| Ncapg    | ENSMUSG00000015880  | 17   | 11   | 88    | 26    | 18   | 10  | 55    | 17   |
| Ncapg2   | ENSMUSG00000042029  | 78   | 9    | 184   | 50    | 101  | 31  | 166   | 54   |
| Ncaph    | ENSMUSG00000034906  | 32   | 7    | 80    | 27    | 35   | 11  | 78    | 26   |
| Ncf1     | ENSMUSG00000015950  | 112  | 33   | 201   | 54    | 124  | 31  | 190   | 42   |
| Nckap11  | ENSMUSG00000022488  | 260  | 42   | 511   | 159   | 240  | 40  | 412   | 73   |
| Ndc80    | ENSMUSG00000024056  | 18   | 8    | 69    | 23    | 19   | 4   | 56    | 15   |
| Necap2   | ENSMUSG00000028923  | 266  | 29   | 348   | 33    | 232  | 24  | 305   | 28   |
| Nek2     | ENSMUSG00000026622  | 16   | 10   | 60    | 22    | 15   | 3   | 46    | 11   |
| Nes      | ENSMUSG00000004891  | 1779 | 216  | 2677  | 688   | 1621 | 280 | 2378  | 347  |
| Nid1     | ENSMUSG00000005397  | 3926 | 530  | 6347  | 1387  | 3634 | 332 | 5323  | 725  |
| Nid2     | ENSMUSG00000021806  | 561  | 130  | 914   | 118   | 537  | 62  | 895   | 114  |
| Nkd2     | ENSMUSG00000021567  | 39   | 11   | 118   | 51    | 36   | 6   | 77    | 24   |
| Nlrc3    | ENSMUSG00000049871  | 58   | 17   | 139   | 45    | 66   | 12  | 140   | 43   |
| Nppa     | ENSMUSG00000041616  | 2919 | 1471 | 17568 | 21348 | 2998 | 848 | 11493 | 6461 |
| Nppb     | ENSMUSG00000029019  | 3896 | 1226 | 10218 | 3100  | 4287 | 995 | 11088 | 3450 |
| Nuf2     | ENSMUSG00000026683  | 21   | 9    | 86    | 40    | 16   | 4   | 77    | 34   |
| Oaf      | ENSMUSG00000032014  | 264  | 77   | 399   | 146   | 208  | 41  | 331   | 55   |
| Olfml3   | ENSMUSG00000027848  | 303  | 52   | 492   | 108   | 323  | 21  | 470   | 29   |

|         |                    |       |      |       |       |       |     |       |      |
|---------|--------------------|-------|------|-------|-------|-------|-----|-------|------|
| Otulin  | ENSMUSG00000046034 | 372   | 28   | 492   | 30    | 374   | 38  | 498   | 73   |
| P2ry6   | ENSMUSG00000048779 | 103   | 15   | 191   | 33    | 95    | 15  | 152   | 28   |
| P3h3    | ENSMUSG00000023191 | 185   | 14   | 319   | 100   | 179   | 28  | 278   | 54   |
| Pabpc1  | ENSMUSG00000022283 | 2750  | 396  | 4424  | 589   | 2940  | 313 | 3983  | 663  |
| Pam     | ENSMUSG00000026335 | 13364 | 1232 | 16353 | 2118  | 13089 | 520 | 17039 | 1382 |
| Pamr1   | ENSMUSG00000027188 | 50    | 16   | 271   | 244   | 44    | 23  | 183   | 117  |
| Pbk     | ENSMUSG00000022033 | 18    | 15   | 71    | 30    | 16    | 9   | 69    | 28   |
| Pcdhgc3 | ENSMUSG00000102918 | 783   | 97   | 981   | 69    | 752   | 51  | 988   | 95   |
| Pclaf   | ENSMUSG00000040204 | 20    | 11   | 70    | 26    | 13    | 4   | 61    | 24   |
| Pcolce  | ENSMUSG00000029718 | 778   | 81   | 1236  | 178   | 675   | 91  | 1133  | 173  |
| Peal5a  | ENSMUSG00000013698 | 2146  | 275  | 2690  | 102   | 2035  | 242 | 2530  | 274  |
| Pfkp    | ENSMUSG00000021196 | 1083  | 101  | 1607  | 246   | 1116  | 108 | 1508  | 216  |
| Pfn1    | ENSMUSG00000018293 | 2349  | 50   | 2712  | 75    | 2362  | 104 | 2642  | 191  |
| Phf1ld  | ENSMUSG00000068245 | 263   | 46   | 403   | 78    | 242   | 30  | 341   | 41   |
| Phlda3  | ENSMUSG00000041801 | 128   | 18   | 222   | 62    | 128   | 4   | 216   | 43   |
| Pi16    | ENSMUSG00000024011 | 1042  | 154  | 1987  | 337   | 1030  | 148 | 1793  | 499  |
| Picalm  | ENSMUSG00000039361 | 3682  | 311  | 4950  | 606   | 3495  | 243 | 4537  | 508  |
| Pimreg  | ENSMUSG00000020808 | 18    | 10   | 79    | 24    | 18    | 4   | 67    | 18   |
| Pirb    | ENSMUSG00000058818 | 142   | 22   | 283   | 84    | 134   | 30  | 266   | 92   |
| Pla2g4a | ENSMUSG00000056220 | 118   | 46   | 201   | 50    | 118   | 39  | 188   | 22   |
| Pla2g7  | ENSMUSG00000023913 | 171   | 21   | 280   | 45    | 172   | 34  | 252   | 45   |
| Plat    | ENSMUSG00000031538 | 475   | 62   | 725   | 65    | 464   | 41  | 699   | 128  |
| Plcg2   | ENSMUSG00000034330 | 248   | 18   | 352   | 61    | 256   | 18  | 349   | 46   |
| Plek    | ENSMUSG00000020120 | 194   | 26   | 382   | 104   | 207   | 35  | 336   | 73   |
| Plekhg2 | ENSMUSG00000037552 | 415   | 79   | 602   | 42    | 355   | 76  | 498   | 81   |
| Plekhh2 | ENSMUSG00000040852 | 172   | 20   | 250   | 25    | 168   | 11  | 228   | 26   |
| Plekho1 | ENSMUSG00000015745 | 873   | 48   | 1229  | 109   | 927   | 54  | 1262  | 202  |
| Plekho2 | ENSMUSG00000050721 | 497   | 98   | 707   | 90    | 525   | 90  | 666   | 108  |
| Pls3    | ENSMUSG00000016382 | 1718  | 79   | 2436  | 255   | 1640  | 157 | 2091  | 235  |
| Pmepal  | ENSMUSG00000038400 | 495   | 93   | 798   | 197   | 520   | 37  | 753   | 189  |
| Pmp22   | ENSMUSG00000018217 | 799   | 98   | 1125  | 49    | 732   | 79  | 1029  | 87   |
| Postn   | ENSMUSG00000027750 | 1288  | 354  | 16369 | 19036 | 1325  | 317 | 10262 | 8108 |
| Ppic    | ENSMUSG00000024538 | 424   | 29   | 954   | 416   | 413   | 41  | 706   | 107  |
| Ppp1r9b | ENSMUSG00000038976 | 1114  | 96   | 1479  | 122   | 1143  | 53  | 1390  | 134  |
| Praf2   | ENSMUSG00000031149 | 91    | 14   | 155   | 27    | 90    | 17  | 137   | 19   |
| Prc1    | ENSMUSG00000038943 | 59    | 10   | 277   | 77    | 74    | 20  | 211   | 83   |
| Prcp    | ENSMUSG00000061119 | 378   | 31   | 583   | 113   | 369   | 43  | 525   | 62   |
| Preld1  | ENSMUSG00000021486 | 540   | 47   | 753   | 58    | 476   | 49  | 647   | 93   |
| Prnd    | ENSMUSG00000027338 | 170   | 30   | 416   | 121   | 167   | 33  | 335   | 59   |
| Prr11   | ENSMUSG00000020493 | 26    | 9    | 79    | 21    | 18    | 6   | 65    | 19   |
| Prrg3   | ENSMUSG00000033361 | 304   | 49   | 476   | 60    | 309   | 45  | 455   | 53   |
| Psat1   | ENSMUSG00000024640 | 65    | 15   | 115   | 35    | 66    | 18  | 116   | 28   |
| Psrc1   | ENSMUSG00000068744 | 10    | 4    | 29    | 15    | 9     | 4   | 29    | 18   |
| Ptgfrn  | ENSMUSG00000027864 | 1116  | 158  | 1460  | 136   | 1089  | 77  | 1442  | 156  |
| Ptgis   | ENSMUSG00000017969 | 202   | 28   | 364   | 114   | 200   | 27  | 323   | 64   |
| Ptma    | ENSMUSG00000026238 | 4087  | 376  | 5328  | 376   | 3885  | 518 | 4897  | 607  |
| Ptprj   | ENSMUSG00000025314 | 404   | 60   | 631   | 75    | 427   | 56  | 571   | 83   |
| Pxdn    | ENSMUSG00000020674 | 2049  | 186  | 2790  | 214   | 2026  | 252 | 2556  | 286  |
| Qsox1   | ENSMUSG00000033684 | 551   | 17   | 792   | 82    | 588   | 46  | 765   | 102  |
| Rab13   | ENSMUSG00000027935 | 64    | 9    | 113   | 32    | 60    | 13  | 95    | 9    |
| Rab31   | ENSMUSG00000056515 | 515   | 47   | 841   | 272   | 486   | 52  | 743   | 141  |
| Rab7b   | ENSMUSG00000052688 | 114   | 17   | 216   | 47    | 113   | 25  | 187   | 28   |
| Racgap1 | ENSMUSG00000023015 | 51    | 13   | 168   | 39    | 47    | 22  | 147   | 53   |
| Rbl1    | ENSMUSG00000027641 | 92    | 18   | 142   | 31    | 88    | 10  | 137   | 16   |
| Rcan1   | ENSMUSG00000022951 | 2025  | 588  | 3577  | 1067  | 2237  | 187 | 3873  | 1294 |
| Rcc2    | ENSMUSG00000040945 | 364   | 24   | 453   | 17    | 354   | 21  | 462   | 57   |
| Rcn3    | ENSMUSG00000019539 | 304   | 49   | 526   | 177   | 289   | 35  | 431   | 74   |
| Rgs16   | ENSMUSG00000026475 | 42    | 13   | 97    | 25    | 41    | 22  | 76    | 17   |
| Rhoc    | ENSMUSG0000002233  | 1016  | 82   | 1471  | 147   | 963   | 60  | 1399  | 180  |
| Ripk1   | ENSMUSG00000021408 | 280   | 44   | 414   | 37    | 283   | 47  | 366   | 18   |
| Rnase4  | ENSMUSG00000021876 | 967   | 55   | 1292  | 169   | 990   | 104 | 1212  | 120  |
| Rnd3    | ENSMUSG00000017144 | 446   | 50   | 573   | 42    | 410   | 17  | 542   | 43   |
| Rnf213  | ENSMUSG00000070327 | 1921  | 265  | 2664  | 212   | 1732  | 232 | 2287  | 172  |
| Rnf4    | ENSMUSG00000029110 | 719   | 66   | 881   | 34    | 682   | 79  | 832   | 58   |
| Rrm2    | ENSMUSG00000020649 | 47    | 3    | 106   | 36    | 46    | 11  | 90    | 24   |
| Rsad2   | ENSMUSG00000020641 | 558   | 59   | 808   | 127   | 569   | 74  | 833   | 251  |
| Rsul    | ENSMUSG00000026727 | 628   | 30   | 848   | 58    | 638   | 25  | 765   | 30   |

|           |                      |      |     |       |      |      |     |       |      |
|-----------|----------------------|------|-----|-------|------|------|-----|-------|------|
| Runx3     | ENSMUSG00000070691   | 15   | 6   | 40    | 18   | 11   | 6   | 33    | 8    |
| S100a10   | ENSMUSG00000041959   | 648  | 48  | 917   | 65   | 558  | 90  | 873   | 124  |
| S100a11   | ENSMUSG00000027907   | 541  | 79  | 1009  | 138  | 513  | 59  | 798   | 136  |
| S100a4    | ENSMUSG00000001020   | 101  | 23  | 185   | 48   | 95   | 20  | 157   | 48   |
| S100a6    | ENSMUSG00000001025   | 463  | 35  | 675   | 47   | 446  | 74  | 610   | 100  |
| Samd9l    | ENSMUSG000000047735  | 766  | 77  | 1115  | 179  | 714  | 95  | 898   | 111  |
| Scml4     | ENSMUSG000000044770  | 68   | 22  | 133   | 24   | 73   | 13  | 155   | 38   |
| Sdc3      | ENSMUSG000000025743  | 1679 | 201 | 2152  | 200  | 1603 | 123 | 1955  | 125  |
| Sec61a1   | ENSMUSG000000030082  | 772  | 59  | 1001  | 99   | 760  | 61  | 922   | 32   |
| Sema3f    | ENSMUSG000000034684  | 281  | 62  | 437   | 37   | 248  | 21  | 450   | 63   |
| Serpinb1c | ENSMUSG000000079049  | 2    | 1   | 40    | 44   | 2    | 1   | 21    | 10   |
| Serpinf1  | ENSMUSG00000000753   | 424  | 109 | 1021  | 469  | 419  | 39  | 783   | 209  |
| Sgol      | ENSMUSG000000023940  | 10   | 3   | 30    | 10   | 11   | 4   | 27    | 6    |
| Sh3bgrl3  | ENSMUSG000000028843  | 283  | 45  | 439   | 75   | 294  | 39  | 393   | 63   |
| Sh3bp2    | ENSMUSG000000054520  | 69   | 26  | 114   | 31   | 61   | 7   | 106   | 12   |
| Sh3pxd2b  | ENSMUSG000000040711  | 249  | 93  | 530   | 157  | 247  | 52  | 411   | 85   |
| Siglec1   | ENSMUSG000000027322  | 120  | 21  | 202   | 53   | 128  | 32  | 195   | 28   |
| Slamf9    | ENSMUSG000000026548  | 102  | 15  | 214   | 66   | 105  | 27  | 174   | 36   |
| Slc7a5    | ENSMUSG000000040010  | 92   | 11  | 140   | 11   | 101  | 4   | 149   | 21   |
| Slfn2     | ENSMUSG000000072620  | 233  | 30  | 361   | 80   | 223  | 50  | 310   | 16   |
| Slfn9     | ENSMUSG000000069793  | 117  | 11  | 264   | 62   | 100  | 26  | 248   | 59   |
| Slmap     | ENSMUSG000000021870  | 4454 | 592 | 5686  | 709  | 4379 | 533 | 6028  | 274  |
| Smc2      | ENSMUSG000000028312  | 165  | 38  | 318   | 105  | 129  | 27  | 242   | 61   |
| Snca      | ENSMUSG000000025889  | 79   | 27  | 187   | 57   | 121  | 41  | 270   | 139  |
| Sntb2     | ENSMUSG000000041308  | 632  | 76  | 913   | 145  | 638  | 68  | 853   | 99   |
| Socs3     | ENSMUSG000000053113  | 83   | 19  | 176   | 67   | 83   | 9   | 171   | 89   |
| Sox9      | ENSMUSG00000000567   | 49   | 4   | 128   | 64   | 53   | 5   | 103   | 17   |
| Spag5     | ENSMUSG000000002055  | 26   | 31  | 54    | 13   | 19   | 10  | 55    | 17   |
| Sparc     | ENSMUSG000000018593  | 7512 | 635 | 18831 | 6579 | 7355 | 933 | 14409 | 2942 |
| Spc25     | ENSMUSG000000005233  | 14   | 8   | 61    | 17   | 18   | 8   | 51    | 25   |
| Spdl1     | ENSMUSG000000069910  | 14   | 4   | 33    | 8    | 11   | 3   | 28    | 11   |
| Specc1    | ENSMUSG000000042331  | 92   | 10  | 188   | 35   | 117  | 18  | 192   | 33   |
| Sprrla    | ENSMUSG000000050359  | 2    | 1   | 59    | 85   | 1    | 1   | 31    | 38   |
| Sptlc2    | ENSMUSG000000021036  | 532  | 46  | 684   | 85   | 500  | 56  | 646   | 54   |
| Sri       | ENSMUSG000000003161  | 820  | 36  | 947   | 43   | 794  | 58  | 937   | 33   |
| Srpx2     | ENSMUSG000000031253  | 164  | 22  | 353   | 215  | 151  | 23  | 300   | 80   |
| Ssc5d     | ENSMUSG000000035279  | 158  | 37  | 405   | 221  | 163  | 32  | 347   | 116  |
| Stab1     | ENSMUSG000000042286  | 1603 | 325 | 2076  | 219  | 1569 | 318 | 2072  | 151  |
| Stc1      | ENSMUSG000000014813  | 72   | 10  | 132   | 17   | 71   | 21  | 124   | 24   |
| Stil      | ENSMUSG000000028718  | 13   | 7   | 37    | 11   | 18   | 15  | 36    | 14   |
| Stmn1     | ENSMUSG000000028832  | 255  | 12  | 400   | 110  | 218  | 34  | 386   | 85   |
| Sulf1     | ENSMUSG000000016918  | 588  | 72  | 1266  | 375  | 636  | 106 | 916   | 142  |
| Svep1     | ENSMUSG000000028369  | 454  | 54  | 1081  | 419  | 488  | 75  | 1015  | 246  |
| Syk       | ENSMUSG000000021457  | 661  | 54  | 816   | 97   | 624  | 37  | 818   | 114  |
| Synpo2l   | ENSMUSG000000039376  | 2429 | 160 | 4589  | 1397 | 2488 | 266 | 4960  | 1191 |
| Tacc3     | ENSMUSG000000037313  | 55   | 17  | 109   | 27   | 41   | 13  | 101   | 32   |
| Tagln2    | ENSMUSG000000026547  | 1222 | 205 | 1863  | 181  | 1131 | 206 | 1710  | 250  |
| Tax1bp3   | ENSMUSG000000040158  | 636  | 52  | 758   | 26   | 603  | 49  | 731   | 37   |
| Tcf19     | ENSMUSG000000050410  | 39   | 7   | 78    | 17   | 36   | 10  | 69    | 16   |
| Tead2     | ENSMUSG000000030796  | 87   | 19  | 131   | 19   | 76   | 18  | 119   | 12   |
| Tgfb1     | ENSMUSG000000002603  | 550  | 90  | 766   | 73   | 584  | 72  | 754   | 96   |
| Tgfb1     | ENSMUSG000000035493  | 530  | 77  | 732   | 148  | 489  | 68  | 651   | 78   |
| Tgif1     | ENSMUSG000000047407  | 80   | 8   | 172   | 68   | 80   | 12  | 125   | 17   |
| Thbs1     | ENSMUSG000000040152  | 409  | 149 | 2336  | 862  | 430  | 59  | 1679  | 388  |
| Thbs3     | ENSMUSG000000028047  | 103  | 23  | 225   | 128  | 92   | 40  | 196   | 95   |
| Thbs4     | ENSMUSG0000000021702 | 98   | 24  | 980   | 1112 | 104  | 23  | 729   | 572  |
| Thy1      | ENSMUSG000000032011  | 161  | 30  | 284   | 38   | 162  | 24  | 265   | 26   |
| Timp1     | ENSMUSG000000001131  | 29   | 17  | 298   | 217  | 27   | 8   | 170   | 133  |
| Timp2     | ENSMUSG000000017466  | 2020 | 279 | 2851  | 462  | 2083 | 233 | 2707  | 361  |
| Tk1       | ENSMUSG000000025574  | 27   | 6   | 65    | 23   | 23   | 5   | 56    | 16   |
| Tln1      | ENSMUSG000000028465  | 3433 | 355 | 4129  | 304  | 3528 | 301 | 4361  | 274  |
| Tlr13     | ENSMUSG000000033777  | 67   | 17  | 156   | 73   | 54   | 17  | 129   | 34   |
| Tlr4      | ENSMUSG000000039005  | 491  | 150 | 724   | 86   | 471  | 25  | 747   | 193  |
| Tmem173   | ENSMUSG000000024349  | 169  | 26  | 277   | 47   | 150  | 31  | 216   | 31   |
| Tmem176b  | ENSMUSG000000029810  | 447  | 59  | 695   | 169  | 422  | 18  | 612   | 87   |
| Tmem254b  | ENSMUSG000000021867  | 94   | 24  | 152   | 22   | 90   | 34  | 151   | 21   |
| Tmsb10    | ENSMUSG000000079523  | 1059 | 131 | 1943  | 416  | 1045 | 141 | 1515  | 201  |

|           |                    |       |      |       |       |       |      |       |       |
|-----------|--------------------|-------|------|-------|-------|-------|------|-------|-------|
| Tmsb4x    | ENSMUSG00000049775 | 6492  | 390  | 9057  | 1900  | 6337  | 792  | 8278  | 983   |
| Tnc       | ENSMUSG00000028364 | 43    | 6    | 544   | 443   | 40    | 8    | 407   | 402   |
| Tnfaip6   | ENSMUSG00000053475 | 16    | 7    | 49    | 21    | 15    | 3    | 40    | 15    |
| Tnfaip8l1 | ENSMUSG00000044469 | 59    | 9    | 106   | 14    | 51    | 10   | 88    | 20    |
| Tnfrsf11b | ENSMUSG00000063727 | 4     | 4    | 30    | 9     | 8     | 3    | 25    | 12    |
| Tnfrsf12a | ENSMUSG00000023905 | 569   | 211  | 1115  | 309   | 580   | 83   | 1245  | 254   |
| Tnfrsf1a  | ENSMUSG00000030341 | 862   | 76   | 1114  | 56    | 808   | 94   | 1077  | 63    |
| Top2a     | ENSMUSG00000020914 | 156   | 64   | 602   | 224   | 141   | 28   | 511   | 197   |
| Tpm2      | ENSMUSG00000028464 | 338   | 60   | 565   | 58    | 358   | 58   | 477   | 79    |
| Tpm3      | ENSMUSG00000027940 | 1515  | 192  | 2133  | 211   | 1390  | 166  | 1854  | 103   |
| Tpm4      | ENSMUSG00000031799 | 3181  | 181  | 4770  | 635   | 3020  | 369  | 4360  | 322   |
| Tpx2      | ENSMUSG00000027469 | 56    | 21   | 186   | 55    | 49    | 21   | 165   | 46    |
| Trem2     | ENSMUSG00000023992 | 35    | 6    | 92    | 48    | 34    | 8    | 74    | 19    |
| Trim47    | ENSMUSG00000020773 | 322   | 56   | 432   | 50    | 294   | 39   | 391   | 53    |
| Trim59    | ENSMUSG00000034317 | 45    | 13   | 121   | 42    | 39    | 10   | 82    | 19    |
| Tspan6    | ENSMUSG00000067377 | 201   | 18   | 351   | 99    | 188   | 36   | 291   | 45    |
| Ttc9      | ENSMUSG00000042734 | 48    | 13   | 109   | 12    | 46    | 8    | 91    | 22    |
| Ttk       | ENSMUSG00000038379 | 11    | 6    | 50    | 21    | 9     | 2    | 35    | 14    |
| Tuba1a    | ENSMUSG00000072235 | 1839  | 223  | 2349  | 176   | 1762  | 189  | 2229  | 379   |
| Tubb5     | ENSMUSG00000001525 | 1852  | 114  | 2383  | 316   | 1680  | 188  | 2353  | 298   |
| Tyms      | ENSMUSG00000025747 | 54    | 5    | 125   | 33    | 37    | 11   | 97    | 35    |
| Tyrobp    | ENSMUSG00000030579 | 196   | 25   | 385   | 134   | 191   | 36   | 314   | 57    |
| Ube2c     | ENSMUSG00000001403 | 26    | 8    | 84    | 26    | 25    | 10   | 76    | 27    |
| Uck2      | ENSMUSG00000026558 | 821   | 87   | 1664  | 260   | 843   | 95   | 1668  | 393   |
| Ugt1a7c   | ENSMUSG00000090124 | 31    | 6    | 81    | 25    | 36    | 7    | 76    | 31    |
| Uhrf1     | ENSMUSG00000001228 | 52    | 9    | 132   | 55    | 40    | 18   | 111   | 47    |
| Ulbp1     | ENSMUSG00000079685 | 96    | 27   | 174   | 24    | 75    | 13   | 122   | 11    |
| Unc93b1   | ENSMUSG00000036908 | 322   | 73   | 550   | 131   | 355   | 31   | 500   | 38    |
| Vat1      | ENSMUSG00000034993 | 610   | 35   | 884   | 140   | 594   | 35   | 798   | 66    |
| Vcan      | ENSMUSG00000021614 | 730   | 115  | 1503  | 151   | 665   | 105  | 1354  | 355   |
| Vim       | ENSMUSG00000026728 | 3763  | 407  | 7380  | 1381  | 3521  | 520  | 6206  | 983   |
| Xirp2     | ENSMUSG00000027022 | 23026 | 1933 | 46990 | 12463 | 24085 | 3291 | 47862 | 16560 |
| Xylt1     | ENSMUSG00000030657 | 76    | 8    | 167   | 19    | 86    | 14   | 139   | 34    |
| Ywhaz     | ENSMUSG00000022285 | 2464  | 152  | 2960  | 156   | 2391  | 141  | 2749  | 56    |
| Zyx       | ENSMUSG00000029860 | 896   | 129  | 1214  | 76    | 876   | 143  | 1120  | 93    |

**Supplementary Table S4.** RNASeq analysis of effects of angiotensin II (AngII) on mRNA expression in hearts from PKN2Het vs WT littermates: mRNAs significantly downregulated by AngII in PKN2Het or WT hearts.

| Gene Symbol   | Ensembl gene id    | WT      |      | WT     |       | PKN2Het |       | PKN2Het |       |
|---------------|--------------------|---------|------|--------|-------|---------|-------|---------|-------|
|               |                    | Vehicle |      | AngII  |       | Vehicle |       | AngII   |       |
|               |                    | Mean    | SD   | Mean   | SD    | Mean    | SD    | Mean    | SD    |
| March6        | ENSMUSG00000039100 | 4345    | 470  | 3364   | 215   | 4521    | 533   | 3717    | 463   |
| A530016L24Rik | ENSMUSG00000043122 | 486     | 59   | 252    | 64    | 537     | 84    | 302     | 85    |
| Abca12        | ENSMUSG00000050296 | 186     | 25   | 118    | 22    | 190     | 14    | 113     | 26    |
| Abcc9         | ENSMUSG00000030249 | 9613    | 652  | 6487   | 953   | 9739    | 961   | 7503    | 994   |
| Acad11        | ENSMUSG00000090150 | 4332    | 376  | 3012   | 486   | 4068    | 456   | 3113    | 804   |
| Acss1         | ENSMUSG00000027452 | 6051    | 350  | 3795   | 623   | 6116    | 511   | 4694    | 536   |
| Adcy9         | ENSMUSG00000005580 | 523     | 37   | 386    | 56    | 548     | 56    | 435     | 28    |
| Adi1          | ENSMUSG00000020629 | 777     | 43   | 587    | 41    | 770     | 25    | 625     | 82    |
| Adra1a        | ENSMUSG00000045875 | 454     | 44   | 309    | 38    | 449     | 28    | 324     | 43    |
| Adrb1         | ENSMUSG00000035283 | 299     | 27   | 186    | 24    | 312     | 44    | 237     | 7     |
| Aes           | ENSMUSG00000054452 | 8100    | 309  | 6557   | 669   | 8573    | 728   | 7022    | 440   |
| Ak4           | ENSMUSG00000028527 | 1110    | 101  | 673    | 88    | 1095    | 120   | 841     | 121   |
| Aldh2         | ENSMUSG00000029455 | 3628    | 278  | 2621   | 303   | 3753    | 239   | 3023    | 178   |
| Aldh4a1       | ENSMUSG00000028737 | 2051    | 114  | 1277   | 213   | 2215    | 312   | 1569    | 163   |
| Aldh6a1       | ENSMUSG00000021238 | 4712    | 450  | 3354   | 316   | 4858    | 561   | 3659    | 653   |
| Aldob         | ENSMUSG00000028307 | 153     | 33   | 37     | 15    | 130     | 33    | 51      | 29    |
| Angpt1        | ENSMUSG00000022309 | 983     | 254  | 585    | 130   | 825     | 181   | 510     | 175   |
| Ano10         | ENSMUSG00000037949 | 698     | 182  | 344    | 58    | 669     | 131   | 405     | 96    |
| Apbb1         | ENSMUSG00000037032 | 1485    | 207  | 973    | 270   | 1582    | 132   | 1096    | 145   |
| Are11         | ENSMUSG00000042350 | 1385    | 91   | 997    | 117   | 1373    | 120   | 1084    | 87    |
| Arfgef1       | ENSMUSG00000067851 | 4031    | 401  | 3145   | 313   | 4160    | 428   | 3482    | 356   |
| Asb10         | ENSMUSG00000038204 | 1171    | 63   | 812    | 130   | 1209    | 144   | 936     | 72    |
| Asb14         | ENSMUSG00000021898 | 1693    | 190  | 1270   | 203   | 1859    | 69    | 1299    | 90    |
| Asb15         | ENSMUSG00000029685 | 1620    | 111  | 997    | 132   | 1719    | 167   | 1139    | 111   |
| Atp2a2        | ENSMUSG00000029467 | 276075  | 9196 | 182185 | 30616 | 276406  | 28699 | 212684  | 20219 |
| Bckdha        | ENSMUSG00000060376 | 3198    | 271  | 2027   | 281   | 3491    | 476   | 2369    | 149   |
| Bckdhb        | ENSMUSG00000032263 | 843     | 53   | 580    | 105   | 820     | 64    | 644     | 127   |
| Blcap         | ENSMUSG00000067787 | 674     | 60   | 518    | 51    | 708     | 57    | 566     | 19    |
| Cacna1s       | ENSMUSG00000026407 | 289     | 41   | 167    | 50    | 318     | 106   | 207     | 31    |
| Calcoco1      | ENSMUSG00000023055 | 2244    | 90   | 1682   | 135   | 2260    | 208   | 1798    | 84    |
| Camk2a        | ENSMUSG00000024617 | 894     | 42   | 584    | 78    | 907     | 103   | 635     | 63    |
| Cbx7          | ENSMUSG00000053411 | 375     | 36   | 283    | 55    | 434     | 66    | 306     | 28    |
| Cdnf          | ENSMUSG00000039496 | 693     | 83   | 462    | 69    | 638     | 86    | 470     | 25    |
| Clasp1        | ENSMUSG00000064302 | 10042   | 1348 | 7016   | 1532  | 10721   | 1184  | 8158    | 674   |
| Clasp2        | ENSMUSG00000033392 | 1555    | 68   | 1255   | 49    | 1588    | 122   | 1315    | 122   |
| Clcn1         | ENSMUSG00000029862 | 122     | 31   | 56     | 16    | 126     | 19    | 52      | 17    |
| Clpx          | ENSMUSG00000015357 | 2210    | 180  | 1776   | 257   | 2247    | 186   | 1932    | 167   |
| Cmtm8         | ENSMUSG00000041012 | 193     | 16   | 122    | 26    | 198     | 19    | 133     | 20    |
| Cmya5         | ENSMUSG00000047419 | 30807   | 1640 | 21498  | 2766  | 31721   | 3064  | 25206   | 2497  |
| Cngb3         | ENSMUSG00000056494 | 85      | 21   | 34     | 5     | 96      | 10    | 48      | 18    |
| Cnst          | ENSMUSG00000038949 | 1417    | 109  | 1052   | 101   | 1496    | 138   | 1149    | 127   |
| Coq8a         | ENSMUSG00000026489 | 8867    | 811  | 6241   | 1021  | 9606    | 1491  | 7168    | 332   |
| Cpeb3         | ENSMUSG00000039652 | 1712    | 172  | 1204   | 231   | 1874    | 247   | 1337    | 250   |
| Creg1         | ENSMUSG00000040713 | 2146    | 83   | 1671   | 135   | 2006    | 90    | 1667    | 106   |
| Crip2         | ENSMUSG00000006356 | 12559   | 568  | 9239   | 1165  | 12739   | 1064  | 10202   | 689   |
| D10Jhu81e     | ENSMUSG00000053329 | 4564    | 257  | 3218   | 428   | 4591    | 348   | 3636    | 306   |
| Dcaf11        | ENSMUSG00000022214 | 2685    | 174  | 1996   | 224   | 2643    | 170   | 2142    | 182   |
| Dcaf8         | ENSMUSG00000026554 | 3228    | 148  | 2835   | 139   | 3162    | 236   | 2954    | 198   |
| Dcun1d2       | ENSMUSG00000038506 | 1528    | 101  | 1151   | 175   | 1592    | 86    | 1245    | 86    |
| Dglucy        | ENSMUSG00000021185 | 1025    | 27   | 630    | 95    | 1021    | 154   | 706     | 146   |
| Dhdh          | ENSMUSG00000011382 | 539     | 37   | 412    | 40    | 541     | 58    | 441     | 60    |
| Dsg2          | ENSMUSG00000044393 | 2214    | 147  | 1452   | 293   | 2105    | 275   | 1573    | 277   |
| Ehhadh        | ENSMUSG00000022853 | 319     | 54   | 215    | 36    | 367     | 52    | 263     | 31    |
| Entpd5        | ENSMUSG00000021236 | 4587    | 555  | 2853   | 380   | 4318    | 388   | 3001    | 409   |
| Epha4         | ENSMUSG00000026235 | 1430    | 183  | 778    | 139   | 1532    | 195   | 924     | 149   |
| Esrra         | ENSMUSG00000024955 | 1498    | 69   | 1122   | 160   | 1612    | 352   | 1242    | 55    |
| Fam174b       | ENSMUSG00000078670 | 5146    | 309  | 3201   | 609   | 5011    | 412   | 3808    | 373   |
| Fblim1        | ENSMUSG00000006219 | 4020    | 400  | 2963   | 478   | 4442    | 528   | 3364    | 287   |



|          |                    |        |       |        |       |        |       |        |       |
|----------|--------------------|--------|-------|--------|-------|--------|-------|--------|-------|
| Fgf1     | ENSMUSG00000036585 | 4273   | 125   | 2800   | 289   | 4103   | 316   | 3148   | 422   |
| Fgf13    | ENSMUSG00000031137 | 912    | 28    | 624    | 84    | 957    | 100   | 687    | 122   |
| Fgf16    | ENSMUSG00000031230 | 350    | 35    | 197    | 36    | 325    | 28    | 212    | 47    |
| Fitm2    | ENSMUSG00000048486 | 4343   | 253   | 2687   | 652   | 4389   | 466   | 3182   | 252   |
| Fktn     | ENSMUSG00000028414 | 919    | 77    | 713    | 82    | 966    | 86    | 734    | 38    |
| Fyco1    | ENSMUSG00000025241 | 8256   | 626   | 6068   | 819   | 8149   | 1328  | 6602   | 1438  |
| Gadd45a  | ENSMUSG00000036390 | 237    | 30    | 173    | 8     | 280    | 38    | 199    | 29    |
| Gal3st3  | ENSMUSG00000047658 | 235    | 33    | 123    | 31    | 253    | 42    | 156    | 27    |
| Gcat     | ENSMUSG00000006378 | 139    | 15    | 88     | 16    | 122    | 23    | 81     | 20    |
| Gcdh     | ENSMUSG00000003809 | 1192   | 92    | 826    | 152   | 1218   | 47    | 907    | 64    |
| Ghr      | ENSMUSG00000055737 | 3256   | 90    | 2495   | 135   | 3239   | 69    | 2574   | 165   |
| Gid4     | ENSMUSG00000018415 | 1429   | 66    | 1151   | 186   | 1528   | 101   | 1208   | 39    |
| Gm10435  | ENSMUSG00000072902 | 350    | 47    | 240    | 57    | 374    | 40    | 256    | 85    |
| Gm10635  | ENSMUSG00000111765 | 62     | 15    | 26     | 11    | 57     | 10    | 29     | 5     |
| Gm37691  | ENSMUSG00000104348 | 120    | 14    | 62     | 18    | 123    | 24    | 83     | 16    |
| Gpd11    | ENSMUSG00000050627 | 1532   | 131   | 1271   | 72    | 1610   | 184   | 1401   | 84    |
| Gpt2     | ENSMUSG00000031700 | 649    | 55    | 444    | 64    | 689    | 85    | 483    | 73    |
| Gramd1b  | ENSMUSG00000040111 | 802    | 117   | 546    | 52    | 929    | 115   | 696    | 158   |
| Grc10    | ENSMUSG00000072772 | 1142   | 101   | 905    | 96    | 1137   | 51    | 918    | 108   |
| Grm1     | ENSMUSG00000019828 | 796    | 113   | 605    | 58    | 918    | 161   | 761    | 121   |
| Gstm2    | ENSMUSG00000040562 | 1088   | 63    | 815    | 54    | 1016   | 120   | 792    | 38    |
| Hadha    | ENSMUSG00000025745 | 29451  | 2086  | 19576  | 3952  | 28687  | 2036  | 22309  | 1220  |
| Hdac11   | ENSMUSG00000034245 | 385    | 30    | 247    | 18    | 404    | 32    | 306    | 52    |
| Hdlbp    | ENSMUSG00000034088 | 16562  | 1228  | 12760  | 1097  | 16946  | 1402  | 13742  | 294   |
| Herpud1  | ENSMUSG00000031770 | 2271   | 311   | 1495   | 173   | 2164   | 218   | 1572   | 242   |
| Idh3g    | ENSMUSG00000002010 | 6376   | 459   | 4785   | 580   | 6418   | 422   | 4954   | 479   |
| Ift81    | ENSMUSG00000029469 | 1002   | 129   | 666    | 78    | 994    | 49    | 708    | 78    |
| Il15     | ENSMUSG00000031712 | 439    | 60    | 265    | 38    | 422    | 29    | 277    | 62    |
| Inmt     | ENSMUSG00000003477 | 120    | 30    | 62     | 9     | 125    | 27    | 60     | 31    |
| Iqsec1   | ENSMUSG00000034312 | 2343   | 237   | 1649   | 239   | 2475   | 375   | 1887   | 147   |
| Isoc1    | ENSMUSG00000024601 | 1090   | 72    | 835    | 76    | 1154   | 85    | 886    | 108   |
| Ivd      | ENSMUSG00000027332 | 5467   | 219   | 3645   | 686   | 5738   | 467   | 4074   | 283   |
| Kcnd2    | ENSMUSG00000060882 | 633    | 53    | 397    | 84    | 534    | 96    | 384    | 46    |
| Kcnj11   | ENSMUSG00000096146 | 2367   | 103   | 1635   | 312   | 2506   | 312   | 1913   | 137   |
| Kcnj12   | ENSMUSG00000042529 | 362    | 32    | 215    | 47    | 369    | 42    | 263    | 36    |
| Kcnj3    | ENSMUSG00000026824 | 1558   | 124   | 892    | 227   | 1560   | 194   | 966    | 194   |
| Kcnj5    | ENSMUSG00000032034 | 1526   | 103   | 978    | 122   | 1446   | 143   | 1137   | 106   |
| Kcncv2   | ENSMUSG00000047298 | 217    | 40    | 101    | 27    | 221    | 15    | 94     | 19    |
| Klf15    | ENSMUSG00000030087 | 629    | 39    | 379    | 62    | 616    | 39    | 429    | 68    |
| Klhdc1   | ENSMUSG00000051890 | 679    | 63    | 505    | 66    | 737    | 123   | 482    | 72    |
| Klhdc7a  | ENSMUSG00000078234 | 208    | 40    | 115    | 26    | 215    | 51    | 132    | 33    |
| Klhl24   | ENSMUSG00000062901 | 8344   | 685   | 6893   | 406   | 8712   | 1112  | 7374   | 755   |
| Klhl30   | ENSMUSG00000026308 | 803    | 90    | 596    | 82    | 845    | 153   | 665    | 56    |
| Klhl38   | ENSMUSG00000022357 | 594    | 49    | 396    | 86    | 598    | 80    | 398    | 64    |
| Ldhd     | ENSMUSG00000031958 | 690    | 79    | 434    | 51    | 734    | 70    | 479    | 49    |
| Lgals4   | ENSMUSG00000053964 | 258    | 38    | 159    | 45    | 261    | 30    | 142    | 30    |
| Lrrc14b  | ENSMUSG00000021579 | 1627   | 72    | 1181   | 214   | 1726   | 119   | 1267   | 58    |
| Lrtm1    | ENSMUSG00000045776 | 10990  | 1420  | 7948   | 2173  | 9808   | 949   | 7556   | 656   |
| Macrodl  | ENSMUSG00000036278 | 1985   | 82    | 1475   | 206   | 2115   | 228   | 1644   | 157   |
| Maob     | ENSMUSG00000040147 | 1029   | 117   | 683    | 136   | 1003   | 67    | 758    | 145   |
| Mccc2    | ENSMUSG00000021646 | 1044   | 126   | 719    | 104   | 1066   | 137   | 833    | 122   |
| Me3      | ENSMUSG00000030621 | 1244   | 36    | 938    | 86    | 1271   | 81    | 1046   | 52    |
| Mfap3l   | ENSMUSG00000031647 | 512    | 38    | 351    | 27    | 511    | 51    | 378    | 15    |
| Mgea5    | ENSMUSG00000025220 | 2744   | 156   | 2258   | 103   | 2825   | 202   | 2463   | 245   |
| Mitf     | ENSMUSG00000035158 | 1007   | 108   | 715    | 103   | 983    | 124   | 817    | 111   |
| Mlycd    | ENSMUSG00000074064 | 1449   | 99    | 1002   | 186   | 1535   | 222   | 1119   | 122   |
| Mmab     | ENSMUSG00000029575 | 681    | 48    | 453    | 44    | 638    | 56    | 508    | 62    |
| Mrgprh   | ENSMUSG00000059408 | 120    | 15    | 59     | 19    | 121    | 13    | 67     | 15    |
| mt-Rnr2  | ENSMUSG00000064339 | 356240 | 61989 | 247940 | 69255 | 362883 | 53161 | 276407 | 38517 |
| Mut      | ENSMUSG00000023921 | 2916   | 284   | 2169   | 324   | 2826   | 245   | 2373   | 210   |
| Mylk3    | ENSMUSG00000031698 | 13367  | 1180  | 7949   | 948   | 12901  | 1032  | 9303   | 1403  |
| Nadk2    | ENSMUSG00000022253 | 1247   | 102   | 792    | 168   | 1254   | 222   | 893    | 160   |
| Nceh1    | ENSMUSG00000027698 | 4775   | 531   | 3631   | 517   | 4935   | 459   | 4158   | 196   |
| Nipsnap2 | ENSMUSG00000029432 | 12499  | 468   | 8522   | 1242  | 13021  | 796   | 9974   | 916   |
| Osbp2    | ENSMUSG00000020435 | 538    | 31    | 388    | 52    | 578    | 65    | 451    | 35    |
| Oxr1     | ENSMUSG00000022307 | 1785   | 149   | 1475   | 130   | 1747   | 115   | 1456   | 95    |
| Oxsm     | ENSMUSG00000021786 | 592    | 47    | 470    | 26    | 633    | 71    | 520    | 20    |

|          |                     |        |      |       |      |        |      |       |      |
|----------|---------------------|--------|------|-------|------|--------|------|-------|------|
| Oxsr1    | ENSMUSG00000036737  | 1469   | 64   | 1253  | 72   | 1563   | 110  | 1374  | 101  |
| P2ry1    | ENSMUSG00000027765  | 592    | 33   | 336   | 93   | 614    | 60   | 420   | 44   |
| Pank1    | ENSMUSG00000033610  | 1036   | 54   | 700   | 77   | 1098   | 87   | 753   | 63   |
| Paqr9    | ENSMUSG00000064225  | 1387   | 188  | 959   | 139  | 1468   | 178  | 1110  | 132  |
| Pcca     | ENSMUSG00000041650  | 1754   | 109  | 1194  | 210  | 1808   | 136  | 1417  | 61   |
| Pcnt     | ENSMUSG00000001151  | 1516   | 71   | 1137  | 205  | 1490   | 140  | 1194  | 68   |
| Pde4a    | ENSMUSG00000032177  | 1479   | 69   | 1032  | 200  | 1596   | 227  | 1163  | 137  |
| Pde4d    | ENSMUSG00000021699  | 566    | 55   | 373   | 47   | 575    | 76   | 416   | 43   |
| Pdhal    | ENSMUSG00000031299  | 24973  | 2883 | 19882 | 1983 | 24844  | 2183 | 21298 | 1610 |
| Pdp1     | ENSMUSG00000049225  | 1052   | 157  | 827   | 97   | 1038   | 87   | 873   | 99   |
| Pdp2     | ENSMUSG00000048371  | 822    | 182  | 433   | 87   | 839    | 116  | 560   | 111  |
| Pdpr     | ENSMUSG00000033624  | 2409   | 176  | 1771  | 254  | 2523   | 330  | 2118  | 147  |
| Pex11a   | ENSMUSG00000030545  | 362    | 28   | 251   | 44   | 360    | 53   | 277   | 16   |
| Pfkfb1   | ENSMUSG00000025271  | 181    | 54   | 76    | 15   | 125    | 29   | 76    | 31   |
| Pink1    | ENSMUSG00000028756  | 7908   | 460  | 5095  | 582  | 8315   | 930  | 5887  | 645  |
| Pkia     | ENSMUSG00000027499  | 6489   | 587  | 5105  | 667  | 6499   | 450  | 5564  | 198  |
| Pkig     | ENSMUSG00000035268  | 1911   | 58   | 1637  | 67   | 1943   | 106  | 1679  | 127  |
| Pkm      | ENSMUSG00000032294  | 19295  | 1479 | 15108 | 1318 | 19558  | 1824 | 16780 | 652  |
| Pla2g5   | ENSMUSG00000041193  | 703    | 60   | 323   | 118  | 617    | 100  | 370   | 76   |
| Pln      | ENSMUSG00000038583  | 103669 | 9371 | 75161 | 8133 | 106163 | 7666 | 81558 | 8775 |
| Plxnb1   | ENSMUSG00000053646  | 817    | 113  | 486   | 68   | 762    | 119  | 534   | 62   |
| Pm20d2   | ENSMUSG00000054659  | 458    | 21   | 337   | 55   | 500    | 64   | 387   | 32   |
| Pnpla8   | ENSMUSG00000036257  | 3505   | 336  | 2968  | 271  | 3603   | 216  | 3140  | 212  |
| Ppargc1a | ENSMUSG00000029167  | 1975   | 310  | 1550  | 238  | 2310   | 255  | 1647  | 126  |
| Ppfibp2  | ENSMUSG00000036528  | 632    | 102  | 494   | 48   | 689    | 69   | 541   | 29   |
| Ppip5k2  | ENSMUSG00000040648  | 2823   | 288  | 1947  | 183  | 2670   | 258  | 1967  | 582  |
| Ppm11    | ENSMUSG00000027784  | 1625   | 159  | 1031  | 184  | 1684   | 206  | 1260  | 149  |
| Ppp1r14c | ENSMUSG00000040653  | 3104   | 380  | 2506  | 85   | 3332   | 336  | 2807  | 364  |
| Pptc7    | ENSMUSG00000038582  | 3687   | 299  | 2559  | 451  | 3939   | 504  | 3081  | 324  |
| Prkab1   | ENSMUSG00000029513  | 625    | 39   | 486   | 57   | 684    | 60   | 543   | 69   |
| Rap1gap2 | ENSMUSG00000038807  | 2208   | 274  | 1592  | 353  | 2292   | 294  | 1806  | 108  |
| Rbfox1   | ENSMUSG00000008658  | 634    | 47   | 360   | 59   | 657    | 70   | 426   | 78   |
| Reep1    | ENSMUSG00000052852  | 440    | 28   | 345   | 23   | 454    | 53   | 354   | 26   |
| Reep5    | ENSMUSG00000005873  | 6212   | 260  | 4792  | 333  | 6407   | 427  | 5212  | 316  |
| Rgs2     | ENSMUSG00000026360  | 831    | 133  | 501   | 64   | 860    | 81   | 573   | 166  |
| Ric8b    | ENSMUSG00000035620  | 1056   | 84   | 764   | 88   | 1036   | 119  | 844   | 32   |
| Rilpl1   | ENSMUSG00000029392  | 2712   | 176  | 2148  | 322  | 2829   | 181  | 2289  | 127  |
| Rmnd5a   | ENSMUSG00000002222  | 2488   | 67   | 2108  | 149  | 2641   | 123  | 2117  | 196  |
| Rpl3l    | ENSMUSG00000002500  | 3330   | 271  | 1888  | 478  | 3250   | 187  | 2275  | 264  |
| Rtn2     | ENSMUSG00000030401  | 979    | 45   | 649   | 92   | 997    | 112  | 733   | 89   |
| Sdha     | ENSMUSG00000021577  | 26565  | 1713 | 17836 | 2991 | 26775  | 2129 | 20539 | 1624 |
| Sec31b   | ENSMUSG00000051984  | 190    | 12   | 140   | 15   | 206    | 17   | 142   | 18   |
| Selenbp1 | ENSMUSG00000068874  | 1432   | 58   | 903   | 170  | 1401   | 157  | 1028  | 139  |
| Sgcb     | ENSMUSG00000029156  | 2725   | 146  | 2351  | 41   | 2817   | 190  | 2512  | 150  |
| Slc20a2  | ENSMUSG00000037656  | 3299   | 120  | 2345  | 335  | 3156   | 313  | 2538  | 136  |
| Slc22a5  | ENSMUSG00000018900  | 515    | 48   | 392   | 19   | 513    | 45   | 415   | 24   |
| Slc25a34 | ENSMUSG00000040740  | 2458   | 124  | 1716  | 276  | 2459   | 202  | 1859  | 71   |
| Slc25a42 | ENSMUSG00000002346  | 919    | 100  | 557   | 97   | 966    | 156  | 583   | 82   |
| Slc27a1  | ENSMUSG00000031808  | 1220   | 145  | 877   | 126  | 1202   | 129  | 879   | 108  |
| Slc4a3   | ENSMUSG00000006576  | 2856   | 245  | 2018  | 244  | 3026   | 328  | 2319  | 297  |
| Smim20   | ENSMUSG000000061461 | 843    | 73   | 641   | 62   | 853    | 63   | 664   | 59   |
| Stom     | ENSMUSG00000026880  | 2813   | 112  | 2237  | 204  | 2994   | 287  | 2470  | 159  |
| Stum     | ENSMUSG00000053963  | 160    | 19   | 64    | 17   | 122    | 38   | 54    | 18   |
| Syde2    | ENSMUSG00000036863  | 475    | 95   | 306   | 46   | 437    | 39   | 305   | 68   |
| Synj2    | ENSMUSG00000023805  | 1330   | 103  | 1004  | 60   | 1390   | 140  | 1030  | 43   |
| Taf1a    | ENSMUSG00000072258  | 316    | 29   | 238   | 17   | 323    | 11   | 239   | 23   |
| Tbcd10c  | ENSMUSG00000040247  | 79     | 13   | 45    | 9    | 80     | 16   | 46    | 8    |
| Tbcd1d16 | ENSMUSG00000039976  | 1680   | 162  | 1163  | 183  | 1773   | 217  | 1329  | 136  |
| Tbcd1d4  | ENSMUSG00000033083  | 2228   | 153  | 1576  | 167  | 2172   | 256  | 1634  | 160  |
| Tbx5     | ENSMUSG00000018263  | 456    | 56   | 299   | 60   | 527    | 87   | 347   | 57   |
| Tcea3    | ENSMUSG00000001604  | 1429   | 35   | 1076  | 111  | 1549   | 116  | 1154  | 106  |
| Tmem150c | ENSMUSG00000050640  | 201    | 25   | 109   | 24   | 249    | 43   | 146   | 26   |
| Tmem182  | ENSMUSG00000079588  | 4532   | 444  | 3422  | 366  | 4747   | 305  | 3856  | 392  |
| Tmem245  | ENSMUSG00000055296  | 3203   | 419  | 2375  | 169  | 3028   | 247  | 2485  | 165  |
| Tmem63b  | ENSMUSG00000036026  | 1741   | 102  | 1317  | 164  | 1858   | 169  | 1449  | 124  |
| Tmem65   | ENSMUSG000000062373 | 3732   | 474  | 2882  | 185  | 3814   | 575  | 3099  | 401  |
| Tnfrsf19 | ENSMUSG000000060548 | 97     | 27   | 54    | 15   | 91     | 22   | 56    | 12   |

|         |                    |       |     |       |     |       |      |       |     |
|---------|--------------------|-------|-----|-------|-----|-------|------|-------|-----|
| Tnni3k  | ENSMUSG00000040086 | 2347  | 262 | 1468  | 283 | 2247  | 145  | 1743  | 187 |
| Trap1   | ENSMUSG00000005981 | 2287  | 176 | 1864  | 73  | 2431  | 195  | 1969  | 70  |
| Trim7   | ENSMUSG00000040350 | 466   | 53  | 297   | 42  | 440   | 107  | 331   | 53  |
| Trip10  | ENSMUSG00000019487 | 1361  | 60  | 1155  | 94  | 1369  | 30   | 1142  | 93  |
| Ttll1   | ENSMUSG00000022442 | 921   | 104 | 531   | 110 | 965   | 54   | 680   | 86  |
| Txlnb   | ENSMUSG00000039891 | 15534 | 643 | 11828 | 883 | 16172 | 1476 | 12752 | 915 |
| Uckl1os | ENSMUSG00000010492 | 61    | 16  | 21    | 7   | 56    | 24   | 31    | 10  |
| Vldlr   | ENSMUSG00000024924 | 9623  | 566 | 7598  | 786 | 10008 | 777  | 8275  | 415 |
| Ybx2    | ENSMUSG00000018554 | 158   | 19  | 86    | 33  | 158   | 21   | 98    | 24  |
| Zfp612  | ENSMUSG00000044676 | 301   | 27  | 215   | 18  | 304   | 9    | 201   | 39  |
| Zygl1b  | ENSMUSG00000034636 | 2665  | 223 | 2061  | 190 | 2682  | 291  | 2292  | 252 |

**Supplementary Table S5.** RNASeq analysis of effects of angiotensin II (AngII) on mRNA expression in hearts from PKN2Het vs WT littermates: mRNAs significantly upregulated by AngII in WT hearts.

| Gene Symbol    | Ensembl gene id     | WT Vehicle |      | WT AngII |      | PKN2Het Vehicle |      | PKN2Het AngII |      |
|----------------|---------------------|------------|------|----------|------|-----------------|------|---------------|------|
|                |                     | Mean       | SD   | Mean     | SD   | Mean            | SD   | Mean          | SD   |
| March1         | ENSMUSG00000036469  | 56         | 11   | 114      | 66   | 64              | 15   | 90            | 21   |
| 1500011B03Rik  | ENSMUSG00000072694  | 30         | 9    | 54       | 13   | 33              | 8    | 48            | 9    |
| 1500015O10Rik  | ENSMUSG00000026051  | 3          | 2    | 49       | 80   | 5               | 3    | 18            | 14   |
| 4930503L19Rik  | ENSMUSG00000044906  | 133        | 18   | 213      | 40   | 136             | 22   | 156           | 26   |
| 9930111J21Rik2 | ENSMUSG00000069892  | 725        | 103  | 926      | 89   | 721             | 107  | 783           | 91   |
| Abca9          | ENSMUSG00000041797  | 849        | 55   | 1144     | 187  | 818             | 92   | 953           | 67   |
| Abhd2          | ENSMUSG00000039202  | 898        | 103  | 1060     | 61   | 933             | 139  | 1000          | 123  |
| AC105304.1     | ENSMUSG00000117110  | 1          | 2    | 19       | 19   | 2               | 2    | 11            | 8    |
| Acp5           | ENSMUSG00000001348  | 5          | 2    | 22       | 17   | 6               | 4    | 15            | 9    |
| Actb           | ENSMUSG00000029580  | 7471       | 1804 | 10178    | 1677 | 7763            | 1384 | 9365          | 1200 |
| Actg1          | ENSMUSG00000062825  | 6824       | 1047 | 8916     | 1194 | 7413            | 1015 | 8405          | 1266 |
| Actg2          | ENSMUSG00000059430  | 11         | 6    | 37       | 14   | 12              | 6    | 20            | 12   |
| Actn4          | ENSMUSG00000054808  | 2213       | 272  | 2742     | 211  | 2012            | 203  | 2417          | 171  |
| Actr2          | ENSMUSG00000020152  | 2099       | 200  | 2493     | 267  | 2101            | 71   | 2352          | 201  |
| Adam10         | ENSMUSG00000054693  | 1295       | 82   | 1540     | 84   | 1289            | 31   | 1416          | 75   |
| Adamts4        | ENSMUSG00000006403  | 26         | 22   | 120      | 29   | 38              | 22   | 83            | 38   |
| Adgra2         | ENSMUSG00000031486  | 286        | 38   | 404      | 66   | 291             | 29   | 400           | 70   |
| Adss           | ENSMUSG00000015961  | 296        | 25   | 391      | 63   | 284             | 33   | 321           | 15   |
| Aebp1          | ENSMUSG00000020473  | 297        | 22   | 678      | 352  | 334             | 100  | 516           | 123  |
| Agm            | ENSMUSG00000041936  | 958        | 125  | 1295     | 154  | 947             | 79   | 1136          | 70   |
| Ahnak2         | ENSMUSG00000072812  | 300        | 55   | 611      | 330  | 327             | 47   | 473           | 130  |
| Aida           | ENSMUSG00000042901  | 767        | 113  | 1024     | 80   | 877             | 107  | 902           | 132  |
| Akr1b8         | ENSMUSG00000029762  | 67         | 13   | 106      | 31   | 68              | 10   | 93            | 26   |
| Akt3           | ENSMUSG00000019699  | 651        | 50   | 856      | 71   | 640             | 112  | 760           | 47   |
| Aldh1a3        | ENSMUSG00000015134  | 25         | 2    | 51       | 12   | 25              | 7    | 49            | 8    |
| Amot           | ENSMUSG00000041688  | 452        | 43   | 612      | 111  | 514             | 116  | 652           | 97   |
| Antxr1         | ENSMUSG00000033420  | 343        | 48   | 747      | 479  | 332             | 36   | 524           | 184  |
| Anxa3          | ENSMUSG00000029484  | 637        | 92   | 881      | 124  | 558             | 119  | 714           | 80   |
| Anxa4          | ENSMUSG00000029994  | 390        | 35   | 552      | 99   | 380             | 26   | 495           | 39   |
| Anxa8          | ENSMUSG00000021950  | 10         | 5    | 45       | 20   | 13              | 5    | 25            | 12   |
| Aoah           | ENSMUSG00000021322  | 51         | 20   | 105      | 50   | 48              | 14   | 83            | 23   |
| Ap2b1          | ENSMUSG00000035152  | 1179       | 64   | 1470     | 164  | 1223            | 59   | 1427          | 130  |
| Ap3s1          | ENSMUSG00000024480  | 226        | 22   | 364      | 126  | 251             | 27   | 316           | 37   |
| Apaf1          | ENSMUSG00000019979  | 202        | 42   | 332      | 75   | 213             | 32   | 293           | 28   |
| Apobec1        | ENSMUSG00000040613  | 119        | 28   | 241      | 144  | 120             | 8    | 163           | 31   |
| Apobr          | ENSMUSG00000042759  | 32         | 3    | 70       | 17   | 32              | 9    | 51            | 18   |
| Apoll1b        | ENSMUSG000000091694 | 7          | 5    | 34       | 9    | 17              | 6    | 37            | 25   |
| App            | ENSMUSG000000022892 | 3981       | 381  | 4939     | 605  | 3820            | 129  | 4513          | 126  |
| Aqp8           | ENSMUSG00000030762  | 83         | 23   | 156      | 68   | 106             | 26   | 182           | 68   |
| Arf3           | ENSMUSG00000051853  | 700        | 31   | 853      | 47   | 714             | 16   | 777           | 34   |
| Arfip1         | ENSMUSG00000074513  | 425        | 63   | 585      | 108  | 425             | 15   | 463           | 26   |
| Arhgap23       | ENSMUSG00000049807  | 496        | 48   | 632      | 37   | 504             | 37   | 586           | 47   |
| Arhgap45       | ENSMUSG00000035697  | 124        | 18   | 203      | 68   | 131             | 23   | 172           | 35   |
| Arhgdia        | ENSMUSG00000025132  | 2274       | 183  | 2741     | 90   | 2286            | 149  | 2537          | 205  |
| Arhgef2        | ENSMUSG00000028059  | 885        | 125  | 1137     | 110  | 951             | 83   | 1051          | 107  |
| Arhgef39       | ENSMUSG00000051517  | 7          | 3    | 25       | 5    | 7               | 4    | 18            | 6    |
| Armex2         | ENSMUSG00000033436  | 204        | 22   | 300      | 52   | 209             | 17   | 270           | 18   |
| Arpc2          | ENSMUSG00000006304  | 2337       | 43   | 2757     | 185  | 2338            | 47   | 2652          | 121  |
| Arpin          | ENSMUSG00000039043  | 239        | 19   | 299      | 19   | 258             | 25   | 280           | 26   |
| Arrb2          | ENSMUSG00000060216  | 182        | 31   | 313      | 100  | 186             | 36   | 253           | 55   |
| Arsb           | ENSMUSG00000042082  | 304        | 35   | 427      | 70   | 298             | 13   | 358           | 32   |
| Aspn           | ENSMUSG00000021388  | 750        | 159  | 3970     | 5012 | 798             | 171  | 1825          | 1043 |
| Ass1           | ENSMUSG00000076441  | 79         | 24   | 147      | 71   | 80              | 5    | 118           | 24   |
| At3            | ENSMUSG00000024759  | 741        | 53   | 1024     | 135  | 748             | 50   | 882           | 82   |
| Atp6v0a4       | ENSMUSG00000038600  | 9          | 7    | 42       | 23   | 11              | 7    | 25            | 11   |
| Atp6v1h        | ENSMUSG00000033793  | 486        | 36   | 596      | 56   | 470             | 28   | 561           | 47   |
| Atp7a          | ENSMUSG00000033792  | 198        | 11   | 253      | 13   | 197             | 21   | 209           | 17   |
| Atp9a          | ENSMUSG00000027546  | 1025       | 69   | 1233     | 124  | 1046            | 42   | 1120          | 130  |
| AW551984       | ENSMUSG00000038112  | 5          | 2    | 17       | 8    | 7               | 4    | 17            | 10   |

|          |                    |      |      |      |      |      |     |      |     |
|----------|--------------------|------|------|------|------|------|-----|------|-----|
| B2m      | ENSMUSG00000060802 | 4421 | 1037 | 6550 | 1100 | 4422 | 785 | 4929 | 246 |
| B3galt2  | ENSMUSG00000033849 | 372  | 49   | 542  | 57   | 383  | 37  | 471  | 157 |
| B4galnt1 | ENSMUSG00000006731 | 31   | 7    | 66   | 39   | 32   | 6   | 48   | 11  |
| B4galt1  | ENSMUSG00000028413 | 1799 | 176  | 2095 | 181  | 1836 | 106 | 2087 | 131 |
| Baalc    | ENSMUSG00000022296 | 20   | 5    | 38   | 10   | 18   | 4   | 29   | 7   |
| Bax      | ENSMUSG00000003873 | 210  | 31   | 278  | 16   | 218  | 17  | 271  | 24  |
| BC037034 | ENSMUSG00000036948 | 67   | 7    | 102  | 13   | 66   | 9   | 74   | 11  |
| Bcl10    | ENSMUSG00000028191 | 379  | 38   | 473  | 26   | 405  | 34  | 468  | 34  |
| Bcl2     | ENSMUSG00000057329 | 294  | 11   | 378  | 46   | 307  | 30  | 367  | 43  |
| Bcl2a1b  | ENSMUSG00000089929 | 18   | 7    | 68   | 61   | 17   | 5   | 44   | 19  |
| Bcl3     | ENSMUSG00000053175 | 60   | 35   | 113  | 24   | 70   | 15  | 98   | 24  |
| Bcl6b    | ENSMUSG00000000317 | 820  | 250  | 1194 | 317  | 923  | 223 | 1077 | 280 |
| Bicc1    | ENSMUSG00000014329 | 681  | 54   | 1034 | 279  | 743  | 66  | 924  | 94  |
| Bin1     | ENSMUSG00000024381 | 163  | 26   | 241  | 35   | 165  | 22  | 215  | 15  |
| Bmp2k    | ENSMUSG00000034663 | 222  | 15   | 328  | 62   | 234  | 20  | 306  | 14  |
| Bora     | ENSMUSG00000022070 | 17   | 4    | 37   | 7    | 18   | 8   | 30   | 4   |
| C1qtnf3  | ENSMUSG00000058914 | 3    | 2    | 341  | 632  | 3    | 2   | 118  | 157 |
| C1qtnf5  | ENSMUSG00000079592 | 53   | 6    | 100  | 38   | 61   | 17  | 87   | 20  |
| C1qtnf7  | ENSMUSG00000061535 | 178  | 26   | 294  | 78   | 174  | 31  | 227  | 32  |
| C3ar1    | ENSMUSG00000040552 | 234  | 31   | 502  | 241  | 242  | 41  | 380  | 97  |
| Cacnb3   | ENSMUSG00000003352 | 53   | 8    | 108  | 38   | 53   | 6   | 75   | 17  |
| Callm5   | ENSMUSG00000049872 | 49   | 5    | 97   | 18   | 60   | 11  | 89   | 26  |
| Calm2    | ENSMUSG00000036438 | 2322 | 263  | 2921 | 526  | 2281 | 193 | 2735 | 103 |
| Camk1d   | ENSMUSG00000039145 | 125  | 28   | 197  | 13   | 146  | 26  | 154  | 32  |
| Camkk1   | ENSMUSG00000020785 | 29   | 5    | 54   | 12   | 30   | 5   | 42   | 7   |
| Capn6    | ENSMUSG00000067276 | 8    | 3    | 42   | 52   | 12   | 8   | 24   | 13  |
| Casp12   | ENSMUSG00000025887 | 208  | 53   | 318  | 96   | 186  | 49  | 260  | 34  |
| Casp3    | ENSMUSG00000031628 | 113  | 29   | 191  | 45   | 108  | 17  | 171  | 41  |
| Cbfb     | ENSMUSG00000031885 | 509  | 26   | 664  | 130  | 518  | 37  | 561  | 32  |
| Ccdc88a  | ENSMUSG00000032740 | 355  | 54   | 511  | 63   | 310  | 60  | 391  | 78  |
| Ccdc88b  | ENSMUSG00000047810 | 26   | 4    | 52   | 17   | 31   | 7   | 43   | 4   |
| Ccl12    | ENSMUSG00000035352 | 28   | 12   | 76   | 30   | 20   | 5   | 61   | 36  |
| Ccr2     | ENSMUSG00000049103 | 85   | 30   | 408  | 389  | 93   | 25  | 233  | 135 |
| Ccr5     | ENSMUSG00000079227 | 186  | 40   | 341  | 137  | 159  | 68  | 244  | 42  |
| Cd180    | ENSMUSG00000021624 | 33   | 12   | 77   | 31   | 53   | 18  | 71   | 11  |
| Cd24a    | ENSMUSG00000047139 | 79   | 19   | 145  | 26   | 90   | 14  | 161  | 75  |
| Cd2ap    | ENSMUSG00000061665 | 690  | 32   | 831  | 97   | 667  | 57  | 750  | 87  |
| Cd33     | ENSMUSG00000004609 | 150  | 35   | 242  | 42   | 149  | 35  | 189  | 29  |
| Cd52     | ENSMUSG00000000682 | 61   | 22   | 171  | 113  | 54   | 14  | 95   | 23  |
| Cd53     | ENSMUSG00000040747 | 129  | 18   | 286  | 154  | 144  | 34  | 221  | 59  |
| Cd55     | ENSMUSG00000026399 | 345  | 57   | 518  | 88   | 369  | 49  | 468  | 57  |
| Cd63     | ENSMUSG00000025351 | 1383 | 97   | 1809 | 371  | 1430 | 52  | 1693 | 169 |
| Cd80     | ENSMUSG00000075122 | 19   | 7    | 60   | 17   | 24   | 9   | 47   | 22  |
| Cd83     | ENSMUSG00000015396 | 132  | 30   | 202  | 45   | 132  | 31  | 168  | 13  |
| Cd86     | ENSMUSG00000022901 | 75   | 19   | 139  | 14   | 88   | 32  | 109  | 23  |
| Cdc25b   | ENSMUSG00000027330 | 92   | 22   | 163  | 19   | 92   | 22  | 150  | 40  |
| Cdc42se1 | ENSMUSG00000046722 | 468  | 71   | 617  | 41   | 442  | 53  | 554  | 68  |
| Cdc6     | ENSMUSG00000017499 | 18   | 6    | 40   | 11   | 16   | 6   | 33   | 8   |
| Cdc7     | ENSMUSG00000029283 | 20   | 3    | 41   | 10   | 29   | 11  | 30   | 8   |
| Cdca2    | ENSMUSG00000048922 | 13   | 3    | 38   | 8    | 27   | 15  | 36   | 10  |
| Cdca4    | ENSMUSG00000047832 | 122  | 18   | 180  | 26   | 120  | 24  | 154  | 24  |
| Cdk14    | ENSMUSG00000028926 | 200  | 28   | 273  | 53   | 192  | 35  | 226  | 37  |
| Cdkn3    | ENSMUSG00000037628 | 13   | 6    | 27   | 8    | 12   | 2   | 21   | 5   |
| Cdr2     | ENSMUSG00000030878 | 234  | 28   | 362  | 52   | 247  | 34  | 334  | 25  |
| Cdr2l    | ENSMUSG00000050910 | 97   | 21   | 164  | 22   | 96   | 12  | 136  | 9   |
| Cdt1     | ENSMUSG00000006585 | 24   | 1    | 51   | 16   | 26   | 8   | 47   | 12  |
| Cemip    | ENSMUSG00000052353 | 1    | 1    | 29   | 37   | 0    | 0   | 17   | 18  |
| Cenpn    | ENSMUSG00000031756 | 14   | 5    | 38   | 13   | 16   | 3   | 27   | 10  |
| Cep192   | ENSMUSG00000024542 | 181  | 30   | 290  | 42   | 205  | 41  | 226  | 32  |
| Cercam   | ENSMUSG00000039787 | 51   | 4    | 142  | 102  | 51   | 14  | 90   | 27  |
| Cggbp1   | ENSMUSG00000054604 | 811  | 96   | 987  | 62   | 796  | 114 | 900  | 95  |
| Chaf1a   | ENSMUSG00000002835 | 62   | 28   | 147  | 37   | 69   | 14  | 117  | 37  |
| Chaf1b   | ENSMUSG00000022945 | 12   | 2    | 37   | 18   | 18   | 4   | 36   | 9   |
| Chst2    | ENSMUSG00000033350 | 33   | 6    | 59   | 8    | 44   | 9   | 45   | 10  |
| Chsy3    | ENSMUSG00000058152 | 5    | 1    | 14   | 5    | 5    | 2   | 9    | 3   |
| Cip2a    | ENSMUSG00000033031 | 56   | 15   | 113  | 30   | 63   | 19  | 81   | 15  |
| Cks1b    | ENSMUSG00000028044 | 53   | 13   | 94   | 14   | 55   | 9   | 83   | 13  |

|           |                    |      |     |       |       |      |     |      |      |
|-----------|--------------------|------|-----|-------|-------|------|-----|------|------|
| Clca3a1   | ENSMUSG00000056025 | 11   | 2   | 33    | 21    | 15   | 8   | 17   | 9    |
| Cldn15    | ENSMUSG00000001739 | 49   | 9   | 95    | 9     | 66   | 28  | 67   | 17   |
| Clec11a   | ENSMUSG00000004473 | 16   | 2   | 53    | 48    | 14   | 4   | 31   | 14   |
| Clec12a   | ENSMUSG00000053063 | 76   | 11  | 211   | 106   | 102  | 28  | 134  | 18   |
| Clec4a1   | ENSMUSG00000049037 | 90   | 14  | 212   | 105   | 96   | 15  | 147  | 36   |
| Clec4a2   | ENSMUSG00000030148 | 46   | 12  | 104   | 63    | 40   | 6   | 79   | 23   |
| Clec4a3   | ENSMUSG00000043832 | 54   | 12  | 126   | 46    | 52   | 9   | 86   | 21   |
| Clspn     | ENSMUSG00000042489 | 17   | 7   | 42    | 12    | 17   | 3   | 38   | 23   |
| Cnn1      | ENSMUSG00000001349 | 37   | 23  | 130   | 75    | 42   | 17  | 53   | 24   |
| Cnn2      | ENSMUSG00000004665 | 793  | 93  | 1039  | 52    | 856  | 80  | 1002 | 98   |
| Cnrip1    | ENSMUSG00000044629 | 67   | 5   | 110   | 32    | 77   | 10  | 96   | 9    |
| Cntln     | ENSMUSG00000038070 | 189  | 18  | 279   | 45    | 181  | 18  | 235  | 37   |
| Cntrl     | ENSMUSG00000057110 | 277  | 35  | 379   | 18    | 284  | 40  | 270  | 21   |
| Col11a1   | ENSMUSG00000027966 | 2    | 3   | 52    | 76    | 2    | 2   | 12   | 11   |
| Col16a1   | ENSMUSG00000040690 | 187  | 39  | 603   | 471   | 192  | 60  | 420  | 186  |
| Col1a1    | ENSMUSG00000001506 | 1941 | 334 | 10243 | 9888  | 2115 | 63  | 5954 | 3420 |
| Col1a2    | ENSMUSG00000029661 | 2657 | 250 | 11812 | 10867 | 2786 | 231 | 7551 | 4300 |
| Col4a5    | ENSMUSG00000031274 | 763  | 91  | 1159  | 304   | 773  | 91  | 971  | 147  |
| Col5a3    | ENSMUSG00000004098 | 576  | 178 | 985   | 63    | 666  | 103 | 847  | 222  |
| Col7a1    | ENSMUSG00000025650 | 4    | 6   | 26    | 21    | 5    | 4   | 11   | 6    |
| Col8a2    | ENSMUSG00000056174 | 9    | 5   | 180   | 298   | 14   | 4   | 86   | 85   |
| Col9a2    | ENSMUSG00000028626 | 6    | 1   | 31    | 38    | 7    | 4   | 21   | 11   |
| Comp      | ENSMUSG00000031849 | 39   | 8   | 325   | 426   | 69   | 9   | 179  | 129  |
| Copbl     | ENSMUSG00000030754 | 983  | 86  | 1212  | 193   | 1045 | 57  | 1076 | 62   |
| Coro1a    | ENSMUSG00000030707 | 175  | 29  | 270   | 73    | 171  | 24  | 228  | 26   |
| Coro1b    | ENSMUSG00000024835 | 688  | 47  | 858   | 53    | 695  | 47  | 802  | 76   |
| Cplx2     | ENSMUSG00000025867 | 149  | 21  | 210   | 31    | 160  | 16  | 218  | 24   |
| Cpne8     | ENSMUSG00000052560 | 161  | 16  | 246   | 70    | 161  | 15  | 217  | 22   |
| Creb3l2   | ENSMUSG00000038648 | 1002 | 88  | 1355  | 234   | 1018 | 47  | 1231 | 121  |
| Crtap     | ENSMUSG00000032431 | 384  | 57  | 511   | 72    | 379  | 32  | 471  | 67   |
| Csf2ra    | ENSMUSG00000059326 | 56   | 11  | 101   | 28    | 65   | 12  | 82   | 17   |
| Csrp1     | ENSMUSG00000026421 | 868  | 80  | 1281  | 109   | 889  | 121 | 1075 | 145  |
| Cstb      | ENSMUSG00000005054 | 171  | 14  | 238   | 43    | 175  | 15  | 218  | 32   |
| Cthrc1    | ENSMUSG00000054196 | 3    | 3   | 221   | 380   | 5    | 2   | 92   | 112  |
| Ctsk      | ENSMUSG00000028111 | 95   | 23  | 247   | 204   | 90   | 21  | 156  | 59   |
| Ctss      | ENSMUSG00000038642 | 458  | 93  | 1279  | 617   | 459  | 103 | 843  | 274  |
| Ctnn      | ENSMUSG00000031078 | 793  | 94  | 1056  | 113   | 811  | 56  | 962  | 95   |
| Ctnnbp2nl | ENSMUSG00000062127 | 644  | 157 | 873   | 93    | 653  | 151 | 770  | 81   |
| Cx3cr1    | ENSMUSG00000052336 | 153  | 23  | 369   | 148   | 170  | 25  | 253  | 86   |
| Cxcl10    | ENSMUSG00000034855 | 12   | 4   | 57    | 37    | 12   | 8   | 27   | 6    |
| Cybb      | ENSMUSG00000015340 | 327  | 42  | 648   | 221   | 360  | 106 | 406  | 69   |
| Cysltr1   | ENSMUSG00000052821 | 54   | 23  | 122   | 68    | 67   | 22  | 119  | 47   |
| Cyth3     | ENSMUSG00000018001 | 939  | 142 | 1235  | 98    | 1006 | 115 | 1159 | 89   |
| Cyth4     | ENSMUSG00000018008 | 207  | 45  | 374   | 116   | 216  | 29  | 315  | 54   |
| D1Ert622e | ENSMUSG00000044768 | 81   | 14  | 134   | 22    | 88   | 9   | 109  | 16   |
| Dap       | ENSMUSG00000039168 | 262  | 38  | 433   | 140   | 293  | 35  | 371  | 55   |
| Dbf4      | ENSMUSG00000002297 | 39   | 11  | 81    | 24    | 39   | 8   | 63   | 4    |
| Dbnl      | ENSMUSG00000020476 | 472  | 46  | 575   | 30    | 501  | 31  | 573  | 37   |
| Dck       | ENSMUSG00000029366 | 104  | 18  | 188   | 15    | 109  | 4   | 138  | 16   |
| Dhx58     | ENSMUSG00000017830 | 37   | 15  | 76    | 24    | 54   | 15  | 63   | 11   |
| Dkk3      | ENSMUSG00000030772 | 52   | 16  | 247   | 258   | 56   | 20  | 169  | 78   |
| Dnm1      | ENSMUSG00000026825 | 162  | 38  | 244   | 43    | 172  | 24  | 214  | 33   |
| Dock11    | ENSMUSG00000031093 | 198  | 35  | 312   | 74    | 204  | 30  | 252  | 29   |
| Dock7     | ENSMUSG00000028556 | 383  | 56  | 520   | 72    | 415  | 36  | 422  | 61   |
| Dok3      | ENSMUSG00000035711 | 38   | 8   | 70    | 27    | 33   | 8   | 52   | 10   |
| Dpep2     | ENSMUSG00000053687 | 21   | 8   | 44    | 15    | 16   | 3   | 33   | 12   |
| Dpp7      | ENSMUSG00000026958 | 48   | 11  | 85    | 22    | 56   | 8   | 80   | 17   |
| Dpy19l1   | ENSMUSG00000043067 | 214  | 23  | 340   | 91    | 229  | 13  | 276  | 30   |
| Dram1     | ENSMUSG00000020057 | 109  | 11  | 158   | 29    | 104  | 11  | 139  | 11   |
| Dse       | ENSMUSG00000039497 | 182  | 24  | 294   | 74    | 230  | 55  | 247  | 27   |
| Dsel      | ENSMUSG00000038702 | 152  | 30  | 302   | 163   | 181  | 17  | 233  | 34   |
| E2f2      | ENSMUSG00000018983 | 15   | 9   | 47    | 2     | 35   | 28  | 45   | 12   |
| E2f3      | ENSMUSG00000016477 | 259  | 22  | 315   | 27    | 280  | 21  | 306  | 28   |
| E2f8      | ENSMUSG00000046179 | 31   | 20  | 49    | 20    | 32   | 12  | 50   | 22   |
| Egr2      | ENSMUSG00000037868 | 32   | 17  | 104   | 54    | 67   | 11  | 86   | 35   |
| Egr3      | ENSMUSG00000033730 | 55   | 46  | 127   | 33    | 126  | 43  | 192  | 110  |
| Eif2ak2   | ENSMUSG00000024079 | 457  | 54  | 612   | 78    | 452  | 48  | 564  | 48   |

|          |                    |      |     |      |      |      |     |      |      |
|----------|--------------------|------|-----|------|------|------|-----|------|------|
| Eif4ebp1 | ENSMUSG00000031490 | 600  | 42  | 768  | 49   | 633  | 27  | 785  | 117  |
| Elf1     | ENSMUSG00000036461 | 427  | 66  | 547  | 56   | 479  | 70  | 499  | 46   |
| Eln      | ENSMUSG00000029675 | 512  | 176 | 2249 | 1534 | 591  | 55  | 1327 | 606  |
| Enpp1    | ENSMUSG00000037370 | 187  | 9   | 495  | 317  | 181  | 24  | 350  | 178  |
| Epb4112  | ENSMUSG00000019978 | 1216 | 183 | 1533 | 194  | 1128 | 76  | 1296 | 65   |
| Epsti1   | ENSMUSG00000022014 | 40   | 10  | 90   | 32   | 45   | 8   | 66   | 11   |
| Ercc6l   | ENSMUSG00000051220 | 19   | 8   | 48   | 17   | 17   | 6   | 34   | 13   |
| Esm1     | ENSMUSG00000042379 | 32   | 4   | 64   | 10   | 34   | 9   | 54   | 17   |
| Etv4     | ENSMUSG00000017724 | 8    | 5   | 29   | 5    | 8    | 3   | 26   | 18   |
| Etv6     | ENSMUSG00000030199 | 527  | 36  | 643  | 63   | 544  | 47  | 566  | 37   |
| Evi2a    | ENSMUSG00000078771 | 85   | 15  | 172  | 58   | 103  | 15  | 147  | 30   |
| Evi2b    | ENSMUSG00000093938 | 37   | 8   | 106  | 37   | 54   | 8   | 77   | 17   |
| Ezh2     | ENSMUSG00000029687 | 114  | 28  | 176  | 40   | 98   | 20  | 147  | 19   |
| Fads2    | ENSMUSG00000024665 | 75   | 13  | 108  | 13   | 83   | 14  | 97   | 12   |
| Fam129a  | ENSMUSG00000026483 | 681  | 70  | 925  | 196  | 630  | 59  | 727  | 64   |
| Fam167b  | ENSMUSG00000050493 | 7    | 3   | 20   | 8    | 8    | 4   | 17   | 5    |
| Fam171b  | ENSMUSG00000048388 | 42   | 7   | 93   | 55   | 48   | 6   | 66   | 20   |
| Fam177a  | ENSMUSG00000095595 | 702  | 134 | 843  | 123  | 776  | 69  | 888  | 27   |
| Fam83d   | ENSMUSG00000027654 | 6    | 3   | 27   | 7    | 5    | 2   | 17   | 9    |
| Fam91a1  | ENSMUSG00000037119 | 520  | 42  | 707  | 99   | 525  | 28  | 606  | 35   |
| Fancd2   | ENSMUSG00000034023 | 13   | 4   | 33   | 8    | 13   | 6   | 28   | 18   |
| Fap      | ENSMUSG00000000392 | 100  | 8   | 185  | 87   | 98   | 34  | 134  | 42   |
| Farp1    | ENSMUSG00000025555 | 294  | 13  | 417  | 92   | 304  | 53  | 390  | 72   |
| Fat1     | ENSMUSG00000070047 | 995  | 230 | 1619 | 361  | 886  | 123 | 1302 | 330  |
| Fbn2     | ENSMUSG00000024598 | 25   | 8   | 112  | 120  | 38   | 10  | 67   | 32   |
| Fcer1g   | ENSMUSG00000058715 | 141  | 25  | 259  | 105  | 135  | 20  | 195  | 28   |
| Fcgr1    | ENSMUSG00000015947 | 58   | 17  | 140  | 69   | 68   | 8   | 103  | 30   |
| Fermt3   | ENSMUSG00000024965 | 71   | 21  | 121  | 22   | 77   | 11  | 108  | 24   |
| Fes      | ENSMUSG00000053158 | 170  | 34  | 266  | 19   | 189  | 43  | 230  | 55   |
| Fgd3     | ENSMUSG00000037946 | 46   | 14  | 84   | 22   | 51   | 10  | 76   | 20   |
| Fgl2     | ENSMUSG00000039899 | 863  | 65  | 1693 | 575  | 912  | 106 | 1331 | 391  |
| Fgr      | ENSMUSG00000028874 | 10   | 5   | 30   | 20   | 9    | 4   | 17   | 11   |
| Fhl1     | ENSMUSG00000023092 | 1773 | 169 | 2590 | 350  | 1838 | 138 | 2464 | 537  |
| Fibin    | ENSMUSG00000074971 | 181  | 32  | 511  | 420  | 193  | 39  | 346  | 121  |
| Flt3     | ENSMUSG00000042817 | 2    | 2   | 16   | 13   | 4    | 3   | 8    | 7    |
| Fmod     | ENSMUSG00000041559 | 30   | 16  | 384  | 621  | 81   | 65  | 169  | 122  |
| Fmr1     | ENSMUSG00000000838 | 269  | 36  | 431  | 176  | 300  | 35  | 342  | 37   |
| Fn1      | ENSMUSG00000026193 | 1579 | 300 | 7830 | 6886 | 1494 | 199 | 4711 | 3367 |
| Foxs1    | ENSMUSG00000074676 | 34   | 11  | 64   | 13   | 46   | 5   | 62   | 22   |
| Frem1    | ENSMUSG00000059049 | 8    | 10  | 51   | 68   | 8    | 4   | 31   | 24   |
| Fut11    | ENSMUSG00000039357 | 204  | 20  | 286  | 68   | 209  | 19  | 246  | 19   |
| Fxyd6    | ENSMUSG00000066705 | 485  | 36  | 809  | 394  | 515  | 53  | 620  | 96   |
| Fyb      | ENSMUSG00000022148 | 104  | 44  | 269  | 144  | 111  | 29  | 216  | 57   |
| Fzd1     | ENSMUSG00000044674 | 164  | 18  | 259  | 65   | 173  | 23  | 223  | 25   |
| G2e3     | ENSMUSG00000035293 | 143  | 24  | 208  | 59   | 161  | 20  | 204  | 41   |
| Gak      | ENSMUSG00000062234 | 517  | 39  | 618  | 25   | 529  | 64  | 553  | 30   |
| Garem2   | ENSMUSG00000044576 | 3    | 3   | 13   | 9    | 3    | 2   | 7    | 4    |
| Gas7     | ENSMUSG00000033066 | 461  | 108 | 644  | 104  | 455  | 58  | 590  | 51   |
| Gatm     | ENSMUSG00000027199 | 79   | 9   | 129  | 34   | 80   | 14  | 103  | 20   |
| Gcnt1    | ENSMUSG00000038843 | 85   | 7   | 138  | 43   | 89   | 8   | 117  | 12   |
| Gcnt4    | ENSMUSG00000091387 | 3    | 2   | 26   | 31   | 3    | 1   | 14   | 10   |
| Gem      | ENSMUSG00000028214 | 71   | 22  | 119  | 13   | 95   | 18  | 126  | 28   |
| Gen1     | ENSMUSG00000051235 | 17   | 8   | 43   | 15   | 30   | 19  | 41   | 16   |
| Gjc1     | ENSMUSG00000034520 | 443  | 31  | 538  | 31   | 438  | 34  | 472  | 43   |
| Glipr1   | ENSMUSG00000056888 | 19   | 3   | 61   | 50   | 17   | 5   | 34   | 19   |
| Gm15675  | ENSMUSG00000086825 | 23   | 4   | 56   | 23   | 34   | 12  | 43   | 15   |
| Gm1966   | ENSMUSG00000073902 | 34   | 9   | 90   | 39   | 50   | 9   | 72   | 22   |
| Gm2026   | ENSMUSG00000078886 | 29   | 10  | 71   | 41   | 64   | 45  | 50   | 32   |
| Gm20559  | ENSMUSG00000106734 | 158  | 25  | 249  | 51   | 169  | 19  | 173  | 37   |
| Gm30873  | ENSMUSG00000109341 | 6    | 4   | 25   | 10   | 11   | 7   | 20   | 4    |
| Gm36161  | ENSMUSG00000114608 | 18   | 6   | 51   | 47   | 19   | 6   | 34   | 17   |
| Gm3636   | ENSMUSG00000091754 | 16   | 5   | 43   | 19   | 24   | 10  | 23   | 5    |
| Gm39214  | ENSMUSG00000109754 | 252  | 32  | 351  | 45   | 256  | 25  | 363  | 83   |
| Gm42047  | ENSMUSG00000110631 | 86   | 19  | 248  | 70   | 75   | 22  | 169  | 103  |
| Gm45705  | ENSMUSG00000110481 | 13   | 3   | 29   | 7    | 14   | 4   | 21   | 3    |
| Gm47761  | ENSMUSG00000112478 | 9    | 2   | 26   | 8    | 7    | 2   | 17   | 10   |
| Gm49342  | ENSMUSG00000021871 | 79   | 19  | 135  | 20   | 95   | 11  | 98   | 23   |

|         |                    |       |      |       |      |       |      |       |      |
|---------|--------------------|-------|------|-------|------|-------|------|-------|------|
| Gm5431  | ENSMUSG00000058163 | 36    | 7    | 65    | 15   | 44    | 6    | 50    | 7    |
| Gm6377  | ENSMUSG00000048621 | 4     | 2    | 18    | 12   | 13    | 16   | 12    | 6    |
| Gm8995  | ENSMUSG00000063286 | 770   | 80   | 1033  | 133  | 749   | 121  | 889   | 142  |
| Gmip    | ENSMUSG00000036246 | 79    | 23   | 131   | 23   | 79    | 20   | 106   | 20   |
| Gnai2   | ENSMUSG00000032562 | 4185  | 325  | 4943  | 197  | 4287  | 161  | 4768  | 360  |
| Gnai3   | ENSMUSG00000000001 | 721   | 11   | 942   | 133  | 676   | 66   | 788   | 53   |
| Gnao1   | ENSMUSG00000031748 | 446   | 40   | 615   | 131  | 524   | 114  | 584   | 73   |
| Golim4  | ENSMUSG00000034109 | 732   | 55   | 1009  | 144  | 790   | 46   | 896   | 57   |
| Gpc6    | ENSMUSG00000058571 | 240   | 29   | 347   | 74   | 228   | 14   | 308   | 59   |
| Gpymb   | ENSMUSG00000029816 | 23    | 2    | 58    | 33   | 25    | 12   | 38    | 17   |
| Gpr176  | ENSMUSG00000040133 | 6     | 3    | 37    | 26   | 7     | 1    | 23    | 18   |
| Gpr34   | ENSMUSG00000040229 | 63    | 25   | 126   | 68   | 77    | 29   | 101   | 26   |
| Gpr39   | ENSMUSG00000026343 | 4     | 2    | 28    | 20   | 6     | 3    | 21    | 14   |
| Gpr65   | ENSMUSG00000021886 | 44    | 9    | 108   | 76   | 42    | 12   | 70    | 21   |
| Gpr68   | ENSMUSG00000047415 | 3     | 3    | 18    | 4    | 8     | 2    | 10    | 7    |
| Gpx8    | ENSMUSG00000021760 | 491   | 35   | 682   | 134  | 493   | 63   | 644   | 76   |
| Gria3   | ENSMUSG00000001986 | 27    | 6    | 74    | 55   | 40    | 11   | 71    | 37   |
| Gsap    | ENSMUSG00000039934 | 66    | 8    | 121   | 24   | 74    | 13   | 95    | 10   |
| Gxylt2  | ENSMUSG00000030074 | 171   | 37   | 519   | 541  | 157   | 23   | 308   | 184  |
| Hacd4   | ENSMUSG00000028497 | 224   | 6    | 334   | 92   | 257   | 33   | 288   | 32   |
| Has2    | ENSMUSG00000022367 | 27    | 6    | 50    | 13   | 28    | 8    | 42    | 6    |
| Haus8   | ENSMUSG00000035439 | 242   | 44   | 381   | 64   | 261   | 50   | 360   | 59   |
| Havcr2  | ENSMUSG00000020399 | 17    | 6    | 42    | 21   | 12    | 4    | 23    | 11   |
| Hbb-bt  | ENSMUSG00000073940 | 3565  | 1643 | 6280  | 1861 | 4671  | 1644 | 8009  | 3238 |
| Hck     | ENSMUSG00000003283 | 35    | 10   | 88    | 47   | 39    | 12   | 58    | 8    |
| Hdac1   | ENSMUSG00000028800 | 455   | 34   | 557   | 48   | 447   | 37   | 529   | 38   |
| Hexa    | ENSMUSG00000025232 | 1121  | 111  | 1417  | 213  | 1139  | 67   | 1382  | 81   |
| Hexb    | ENSMUSG00000021665 | 487   | 58   | 816   | 323  | 492   | 50   | 666   | 110  |
| Hjurp   | ENSMUSG00000044783 | 577   | 122  | 775   | 43   | 589   | 90   | 674   | 87   |
| Hmgb2   | ENSMUSG00000054717 | 115   | 21   | 211   | 30   | 135   | 37   | 202   | 60   |
| Hmgn3   | ENSMUSG00000066456 | 78    | 20   | 130   | 43   | 71    | 15   | 108   | 14   |
| Hpgd    | ENSMUSG00000031613 | 182   | 26   | 300   | 44   | 240   | 31   | 258   | 32   |
| Hpgds   | ENSMUSG00000029919 | 67    | 16   | 152   | 74   | 91    | 33   | 92    | 21   |
| Hspg2   | ENSMUSG00000028763 | 12506 | 1017 | 15279 | 1628 | 12610 | 707  | 14990 | 1190 |
| Iffo2   | ENSMUSG00000041025 | 210   | 56   | 296   | 34   | 208   | 41   | 260   | 55   |
| Ifi203  | ENSMUSG00000039997 | 891   | 161  | 1230  | 255  | 880   | 117  | 940   | 84   |
| Ifi209  | ENSMUSG00000043263 | 52    | 15   | 126   | 69   | 50    | 17   | 92    | 45   |
| Ifi211  | ENSMUSG00000026536 | 185   | 36   | 351   | 104  | 178   | 18   | 256   | 21   |
| Ifi30   | ENSMUSG00000031838 | 101   | 27   | 193   | 76   | 87    | 20   | 127   | 31   |
| Ifih1   | ENSMUSG00000026896 | 299   | 32   | 446   | 46   | 329   | 56   | 378   | 53   |
| Ifit1   | ENSMUSG00000034459 | 187   | 43   | 329   | 102  | 161   | 24   | 234   | 21   |
| Ifit2   | ENSMUSG00000045932 | 547   | 92   | 934   | 140  | 539   | 58   | 669   | 52   |
| Ifit3   | ENSMUSG00000074896 | 336   | 93   | 626   | 210  | 311   | 45   | 430   | 29   |
| Ifit3b  | ENSMUSG00000062488 | 122   | 30   | 208   | 57   | 123   | 22   | 150   | 9    |
| Igf1    | ENSMUSG00000020053 | 384   | 78   | 1064  | 595  | 422   | 57   | 770   | 126  |
| Igf2bp2 | ENSMUSG00000033581 | 72    | 26   | 122   | 41   | 102   | 14   | 135   | 38   |
| Igfbp2  | ENSMUSG00000039323 | 1     | 1    | 24    | 20   | 0     | 1    | 4     | 4    |
| Igfbp5  | ENSMUSG00000026185 | 2981  | 305  | 5165  | 1633 | 3493  | 830  | 4402  | 921  |
| Ighm    | ENSMUSG00000076617 | 206   | 22   | 302   | 49   | 234   | 29   | 292   | 34   |
| Igsf10  | ENSMUSG00000036334 | 145   | 33   | 315   | 123  | 162   | 38   | 247   | 69   |
| Ikzf1   | ENSMUSG00000018654 | 64    | 21   | 119   | 32   | 75    | 10   | 86    | 10   |
| Il13ra1 | ENSMUSG00000017057 | 1206  | 209  | 1526  | 234  | 1225  | 65   | 1443  | 213  |
| Il18rap | ENSMUSG00000026068 | 5     | 4    | 17    | 7    | 3     | 2    | 6     | 4    |
| Il1b    | ENSMUSG00000027398 | 20    | 8    | 71    | 68   | 17    | 7    | 29    | 8    |
| Il21r   | ENSMUSG00000030745 | 15    | 3    | 46    | 25   | 17    | 2    | 35    | 6    |
| Il2r    | ENSMUSG00000040612 | 25    | 9    | 63    | 21   | 39    | 23   | 51    | 20   |
| Irf5    | ENSMUSG00000029771 | 73    | 13   | 148   | 22   | 78    | 12   | 119   | 35   |
| Irf8    | ENSMUSG00000041515 | 118   | 13   | 229   | 76   | 128   | 21   | 193   | 26   |
| Isg15   | ENSMUSG00000035692 | 59    | 12   | 120   | 28   | 67    | 16   | 93    | 12   |
| Isg20   | ENSMUSG00000039236 | 86    | 30   | 130   | 16   | 102   | 27   | 144   | 32   |
| Islr    | ENSMUSG00000037206 | 560   | 95   | 865   | 285  | 608   | 50   | 774   | 128  |
| Itga4   | ENSMUSG00000027009 | 88    | 24   | 170   | 60   | 100   | 20   | 120   | 28   |
| Itgav   | ENSMUSG00000027087 | 584   | 81   | 920   | 293  | 645   | 110  | 863   | 204  |
| Itgax   | ENSMUSG00000030789 | 14    | 13   | 49    | 40   | 11    | 3    | 41    | 38   |
| Itgb1   | ENSMUSG00000025809 | 10648 | 748  | 12926 | 1642 | 10469 | 431  | 12265 | 1179 |
| Itgb2   | ENSMUSG00000000290 | 175   | 40   | 280   | 60   | 156   | 29   | 225   | 46   |
| Itgb3   | ENSMUSG00000020689 | 55    | 19   | 135   | 26   | 74    | 35   | 101   | 24   |



|         |                     |      |     |      |      |      |     |      |     |
|---------|---------------------|------|-----|------|------|------|-----|------|-----|
| Itgb8   | ENSMUSG00000025321  | 44   | 17  | 94   | 45   | 58   | 14  | 57   | 7   |
| Itgb11  | ENSMUSG00000032925  | 238  | 42  | 795  | 674  | 281  | 46  | 513  | 150 |
| Itih2   | ENSMUSG00000037254  | 10   | 2   | 36   | 22   | 10   | 1   | 20   | 5   |
| Itm2a   | ENSMUSG00000031239  | 204  | 26  | 483  | 405  | 214  | 32  | 305  | 66  |
| Kcne1   | ENSMUSG00000039639  | 91   | 46  | 147  | 42   | 92   | 14  | 127  | 27  |
| Kctd10  | ENSMUSG00000001098  | 1166 | 95  | 1425 | 67   | 1193 | 154 | 1325 | 119 |
| Kctd12  | ENSMUSG00000098557  | 889  | 110 | 1244 | 276  | 915  | 43  | 1073 | 34  |
| Kctd12b | ENSMUSG00000041633  | 620  | 130 | 959  | 330  | 830  | 137 | 891  | 240 |
| Kctd15  | ENSMUSG00000030499  | 38   | 5   | 65   | 13   | 39   | 8   | 54   | 12  |
| Kdelr3  | ENSMUSG00000010830  | 122  | 17  | 231  | 83   | 128  | 25  | 188  | 48  |
| Kif18a  | ENSMUSG00000027115  | 33   | 7   | 55   | 18   | 33   | 3   | 53   | 12  |
| Kif20b  | ENSMUSG00000024795  | 44   | 17  | 104  | 56   | 35   | 19  | 80   | 25  |
| Kirrel  | ENSMUSG00000041734  | 354  | 32  | 515  | 106  | 351  | 32  | 432  | 45  |
| Klhl29  | ENSMUSG00000020627  | 12   | 4   | 36   | 26   | 16   | 6   | 21   | 5   |
| Krt18   | ENSMUSG00000023043  | 11   | 4   | 41   | 28   | 17   | 8   | 20   | 7   |
| Lacc1   | ENSMUSG00000044350  | 110  | 10  | 170  | 40   | 111  | 18  | 129  | 16  |
| Lair1   | ENSMUSG00000055541  | 93   | 25  | 193  | 59   | 88   | 18  | 152  | 37  |
| Lbp     | ENSMUSG00000016024  | 114  | 14  | 211  | 51   | 141  | 27  | 174  | 37  |
| Ldlrad4 | ENSMUSG00000024544  | 207  | 23  | 293  | 57   | 198  | 24  | 230  | 26  |
| Lhfp    | ENSMUSG00000048332  | 883  | 63  | 1348 | 372  | 958  | 40  | 1113 | 122 |
| Lilrb4a | ENSMUSG000000112148 | 184  | 42  | 406  | 123  | 195  | 44  | 266  | 91  |
| Lix11   | ENSMUSG00000049288  | 862  | 45  | 1020 | 63   | 903  | 22  | 948  | 26  |
| Lmna    | ENSMUSG00000028063  | 1287 | 73  | 1552 | 83   | 1330 | 102 | 1508 | 161 |
| Lmnb1   | ENSMUSG00000024590  | 122  | 21  | 210  | 37   | 129  | 15  | 185  | 47  |
| Lox     | ENSMUSG00000024529  | 89   | 9   | 1050 | 1321 | 94   | 21  | 476  | 436 |
| Lox13   | ENSMUSG00000000693  | 104  | 36  | 311  | 233  | 87   | 12  | 196  | 70  |
| Lpcat2  | ENSMUSG00000033192  | 36   | 10  | 94   | 53   | 31   | 6   | 64   | 11  |
| Lpp     | ENSMUSG00000033306  | 1398 | 218 | 1794 | 95   | 1378 | 115 | 1689 | 226 |
| Lpxn    | ENSMUSG00000024696  | 18   | 5   | 55   | 29   | 22   | 7   | 34   | 9   |
| Lrmp    | ENSMUSG00000030263  | 36   | 7   | 68   | 14   | 45   | 10  | 53   | 5   |
| Lrrc32  | ENSMUSG00000090958  | 328  | 91  | 455  | 36   | 361  | 64  | 432  | 52  |
| Lrrc59  | ENSMUSG00000020869  | 766  | 27  | 883  | 28   | 772  | 44  | 888  | 71  |
| Lspl    | ENSMUSG00000018819  | 614  | 136 | 984  | 350  | 600  | 112 | 808  | 176 |
| Lst1    | ENSMUSG00000073412  | 16   | 5   | 43   | 19   | 20   | 5   | 34   | 7   |
| Ltbp2   | ENSMUSG00000002020  | 94   | 45  | 964  | 1120 | 126  | 62  | 578  | 514 |
| Ltbp3   | ENSMUSG00000024940  | 530  | 28  | 924  | 412  | 618  | 50  | 772  | 112 |
| Lum     | ENSMUSG00000036446  | 1447 | 238 | 3824 | 2686 | 1553 | 192 | 2795 | 564 |
| Lxn     | ENSMUSG00000047557  | 65   | 9   | 139  | 25   | 70   | 19  | 104  | 26  |
| Lyl1    | ENSMUSG00000034041  | 75   | 11  | 111  | 12   | 85   | 3   | 91   | 4   |
| Maf     | ENSMUSG00000055435  | 389  | 56  | 552  | 118  | 424  | 20  | 460  | 80  |
| Maff    | ENSMUSG00000042622  | 133  | 18  | 220  | 64   | 128  | 36  | 187  | 43  |
| Malt1   | ENSMUSG00000032688  | 196  | 29  | 270  | 27   | 193  | 17  | 212  | 27  |
| Mapre1  | ENSMUSG00000027479  | 1639 | 151 | 1876 | 92   | 1651 | 91  | 1859 | 64  |
| Marcks  | ENSMUSG00000069662  | 819  | 115 | 1485 | 784  | 999  | 154 | 1070 | 121 |
| Mastl   | ENSMUSG00000026779  | 21   | 19  | 58   | 17   | 22   | 7   | 58   | 28  |
| Matn2   | ENSMUSG00000022324  | 417  | 57  | 667  | 192  | 429  | 35  | 559  | 39  |
| Mcm5    | ENSMUSG00000005410  | 84   | 12  | 162  | 45   | 83   | 19  | 169  | 35  |
| Mcm6    | ENSMUSG00000026355  | 230  | 32  | 397  | 77   | 216  | 18  | 363  | 70  |
| Mcub    | ENSMUSG00000027994  | 41   | 14  | 77   | 15   | 37   | 4   | 50   | 10  |
| Mdk     | ENSMUSG00000027239  | 26   | 4   | 95   | 130  | 24   | 6   | 43   | 34  |
| Meg3    | ENSMUSG00000021268  | 123  | 46  | 231  | 107  | 121  | 17  | 140  | 38  |
| Megf10  | ENSMUSG00000024593  | 19   | 6   | 49   | 31   | 30   | 3   | 40   | 15  |
| Mex3c   | ENSMUSG00000037253  | 486  | 50  | 607  | 52   | 503  | 15  | 557  | 37  |
| Mfap2   | ENSMUSG00000060572  | 20   | 2   | 69   | 61   | 23   | 4   | 41   | 14  |
| Mfap3   | ENSMUSG00000020522  | 454  | 25  | 541  | 33   | 431  | 20  | 503  | 22  |
| Mgam    | ENSMUSG00000068587  | 9    | 4   | 32   | 24   | 15   | 4   | 30   | 21  |
| Mgat2   | ENSMUSG00000043998  | 423  | 27  | 547  | 64   | 443  | 34  | 503  | 31  |
| Mgp     | ENSMUSG00000030218  | 1671 | 257 | 3299 | 1832 | 1627 | 149 | 2424 | 267 |
| Milr1   | ENSMUSG00000040528  | 16   | 6   | 43   | 18   | 16   | 4   | 35   | 10  |
| Misl8a  | ENSMUSG00000022978  | 46   | 8   | 79   | 17   | 61   | 14  | 68   | 8   |
| Mkrn1   | ENSMUSG00000029922  | 598  | 102 | 779  | 95   | 681  | 119 | 829  | 128 |
| Mmp14   | ENSMUSG00000000957  | 291  | 39  | 862  | 471  | 332  | 50  | 582  | 198 |
| Mmp16   | ENSMUSG00000028226  | 14   | 6   | 34   | 13   | 18   | 6   | 22   | 9   |
| Mns1    | ENSMUSG00000032221  | 9    | 2   | 49   | 8    | 14   | 7   | 28   | 16  |
| Mob1a   | ENSMUSG00000043131  | 1089 | 121 | 1399 | 155  | 1053 | 73  | 1248 | 99  |
| Mpeg1   | ENSMUSG00000046805  | 387  | 93  | 1323 | 966  | 395  | 77  | 809  | 361 |
| Mpz11   | ENSMUSG00000026566  | 252  | 38  | 353  | 54   | 258  | 43  | 287  | 41  |

|         |                    |      |     |       |       |      |      |       |      |
|---------|--------------------|------|-----|-------|-------|------|------|-------|------|
| Mrc2    | ENSMUSG00000020695 | 462  | 41  | 913   | 394   | 473  | 31   | 716   | 159  |
| Ms4a14  | ENSMUSG00000099398 | 18   | 2   | 74    | 52    | 16   | 6    | 34    | 17   |
| Ms4a4b  | ENSMUSG00000056290 | 4    | 2   | 18    | 15    | 8    | 4    | 9     | 4    |
| Ms4a4c  | ENSMUSG00000024675 | 8    | 4   | 38    | 33    | 10   | 3    | 16    | 8    |
| Ms4a6d  | ENSMUSG00000024679 | 61   | 21  | 136   | 54    | 54   | 15   | 109   | 45   |
| Ms4a7   | ENSMUSG00000024672 | 65   | 11  | 296   | 303   | 51   | 5    | 166   | 95   |
| Mtfr2   | ENSMUSG00000019992 | 4    | 2   | 15    | 5     | 3    | 1    | 10    | 2    |
| Mthfd2  | ENSMUSG0000005667  | 41   | 11  | 81    | 14    | 49   | 16   | 81    | 18   |
| Mtmr11  | ENSMUSG00000045934 | 69   | 26  | 114   | 28    | 68   | 30   | 107   | 32   |
| Mtpn    | ENSMUSG00000029840 | 1161 | 76  | 1505  | 277   | 1222 | 89   | 1380  | 115  |
| Mx1     | ENSMUSG00000000386 | 20   | 10  | 55    | 32    | 17   | 6    | 22    | 11   |
| Mxra8   | ENSMUSG00000029070 | 431  | 61  | 782   | 329   | 511  | 145  | 714   | 119  |
| Myc     | ENSMUSG00000022346 | 48   | 8   | 98    | 19    | 58   | 7    | 95    | 39   |
| Myef2   | ENSMUSG00000027201 | 185  | 24  | 262   | 27    | 174  | 6    | 207   | 19   |
| Myh7    | ENSMUSG00000053093 | 1672 | 510 | 20844 | 27743 | 2490 | 1006 | 11438 | 8811 |
| Myh9    | ENSMUSG00000022443 | 4467 | 917 | 6229  | 813   | 4465 | 679  | 5733  | 609  |
| Myl9    | ENSMUSG00000067818 | 507  | 113 | 744   | 105   | 504  | 152  | 536   | 41   |
| Myo1e   | ENSMUSG00000032220 | 382  | 52  | 541   | 82    | 377  | 40   | 487   | 59   |
| Myo1g   | ENSMUSG00000020437 | 50   | 9   | 89    | 21    | 55   | 12   | 90    | 33   |
| Myo5a   | ENSMUSG00000034593 | 359  | 55  | 615   | 165   | 371  | 102  | 518   | 152  |
| Naalad2 | ENSMUSG00000043943 | 352  | 43  | 575   | 192   | 346  | 54   | 447   | 64   |
| Nab2    | ENSMUSG00000025402 | 178  | 29  | 277   | 77    | 177  | 31   | 248   | 30   |
| Nav1    | ENSMUSG00000009418 | 1498 | 290 | 1893  | 171   | 1457 | 90   | 1737  | 179  |
| Ncapd2  | ENSMUSG00000038252 | 298  | 45  | 437   | 112   | 363  | 44   | 394   | 55   |
| Nedd9   | ENSMUSG00000021365 | 728  | 336 | 1059  | 86    | 794  | 203  | 936   | 202  |
| Neil3   | ENSMUSG00000039396 | 10   | 3   | 35    | 11    | 13   | 11   | 23    | 8    |
| Neur13  | ENSMUSG00000047180 | 159  | 33  | 303   | 74    | 176  | 25   | 246   | 35   |
| Nfam1   | ENSMUSG00000058099 | 110  | 22  | 202   | 30    | 118  | 21   | 160   | 20   |
| Nfkbie  | ENSMUSG00000023947 | 37   | 6   | 81    | 15    | 38   | 5    | 56    | 8    |
| Nfkbiz  | ENSMUSG00000035356 | 92   | 25  | 164   | 59    | 103  | 9    | 151   | 32   |
| Nhs12   | ENSMUSG00000079481 | 276  | 31  | 399   | 49    | 272  | 39   | 339   | 24   |
| Nkd1    | ENSMUSG00000031661 | 22   | 8   | 42    | 10    | 25   | 6    | 30    | 7    |
| Nlgn2   | ENSMUSG00000051790 | 167  | 30  | 260   | 63    | 167  | 33   | 228   | 39   |
| Nmrk2   | ENSMUSG00000004939 | 73   | 9   | 158   | 71    | 68   | 15   | 132   | 76   |
| Nmt2    | ENSMUSG00000026643 | 286  | 28  | 378   | 59    | 277  | 25   | 339   | 48   |
| Nnmt    | ENSMUSG00000032271 | 42   | 5   | 88    | 24    | 47   | 10   | 60    | 8    |
| Nox4    | ENSMUSG00000030562 | 31   | 5   | 162   | 173   | 29   | 9    | 64    | 30   |
| Npdc1   | ENSMUSG00000015094 | 238  | 45  | 344   | 63    | 227  | 27   | 280   | 28   |
| Npl     | ENSMUSG00000042684 | 26   | 8   | 47    | 8     | 28   | 8    | 51    | 12   |
| Npnt    | ENSMUSG00000040998 | 22   | 7   | 57    | 25    | 31   | 14   | 28    | 9    |
| Nptxr   | ENSMUSG00000022421 | 69   | 12  | 105   | 10    | 64   | 14   | 94    | 14   |
| Nrep    | ENSMUSG00000042834 | 535  | 52  | 997   | 503   | 559  | 60   | 711   | 91   |
| Nrros   | ENSMUSG00000052384 | 157  | 25  | 231   | 32    | 162  | 27   | 220   | 28   |
| Nts     | ENSMUSG00000019890 | 21   | 8   | 42    | 6     | 25   | 4    | 33    | 13   |
| Nucb2   | ENSMUSG00000030659 | 137  | 19  | 239   | 55    | 144  | 20   | 174   | 24   |
| Nupr1   | ENSMUSG00000030717 | 60   | 10  | 196   | 120   | 74   | 8    | 130   | 33   |
| Nusap1  | ENSMUSG00000027306 | 48   | 17  | 132   | 40    | 45   | 9    | 116   | 36   |
| Nxpe4   | ENSMUSG00000044229 | 315  | 33  | 430   | 45    | 320  | 35   | 379   | 48   |
| Nxpe5   | ENSMUSG00000047592 | 11   | 6   | 35    | 8     | 9    | 4    | 28    | 15   |
| Oas1a   | ENSMUSG00000052776 | 82   | 18  | 149   | 24    | 88   | 14   | 121   | 8    |
| Oas3    | ENSMUSG00000032661 | 6    | 1   | 34    | 18    | 9    | 3    | 18    | 9    |
| Oas11   | ENSMUSG00000041827 | 32   | 9   | 56    | 13    | 38   | 7    | 48    | 5    |
| Oas12   | ENSMUSG00000029561 | 269  | 62  | 498   | 109   | 332  | 69   | 402   | 43   |
| Olf158  | ENSMUSG00000070423 | 167  | 26  | 236   | 25    | 154  | 13   | 204   | 33   |
| Olf156  | ENSMUSG00000040328 | 6    | 3   | 19    | 7     | 8    | 2    | 10    | 5    |
| Omd     | ENSMUSG00000048368 | 16   | 4   | 58    | 62    | 32   | 17   | 29    | 10   |
| Otulin1 | ENSMUSG00000056069 | 53   | 9   | 133   | 67    | 61   | 15   | 119   | 66   |
| P2rx7   | ENSMUSG00000029468 | 140  | 30  | 223   | 46    | 141  | 24   | 188   | 49   |
| P3h1    | ENSMUSG00000028641 | 217  | 25  | 313   | 43    | 242  | 18   | 308   | 55   |
| P4ha3   | ENSMUSG00000051048 | 2    | 2   | 23    | 32    | 1    | 1    | 11    | 10   |
| Pak1    | ENSMUSG00000030774 | 34   | 10  | 89    | 41    | 49   | 20   | 57    | 18   |
| Panx1   | ENSMUSG00000031934 | 35   | 11  | 98    | 49    | 42   | 21   | 76    | 30   |
| Parp9   | ENSMUSG00000022906 | 467  | 40  | 651   | 71    | 484  | 24   | 548   | 44   |
| Parpbp  | ENSMUSG00000035365 | 8    | 4   | 24    | 9     | 7    | 2    | 18    | 11   |
| Pcdh17  | ENSMUSG00000035566 | 299  | 64  | 458   | 76    | 316  | 37   | 426   | 89   |
| Pcsk5   | ENSMUSG00000024713 | 67   | 10  | 129   | 24    | 84   | 4    | 119   | 16   |
| Pdgfr1  | ENSMUSG00000031595 | 48   | 13  | 182   | 194   | 44   | 4    | 108   | 62   |

|          |                    |      |     |      |     |      |     |      |     |
|----------|--------------------|------|-----|------|-----|------|-----|------|-----|
| Pdk3     | ENSMUSG00000035232 | 44   | 14  | 83   | 17  | 53   | 21  | 69   | 7   |
| Pdlim2   | ENSMUSG00000022090 | 106  | 9   | 175  | 59  | 121  | 17  | 153  | 29  |
| Pdlim3   | ENSMUSG00000031636 | 187  | 22  | 301  | 87  | 190  | 20  | 249  | 48  |
| Pdpn     | ENSMUSG00000028583 | 91   | 16  | 188  | 37  | 105  | 17  | 159  | 30  |
| Pgm2     | ENSMUSG00000029171 | 116  | 24  | 174  | 30  | 127  | 15  | 159  | 19  |
| Phf11b   | ENSMUSG00000091649 | 41   | 10  | 91   | 36  | 39   | 9   | 65   | 19  |
| Phldb2   | ENSMUSG00000033149 | 633  | 66  | 824  | 141 | 626  | 28  | 795  | 54  |
| Pi15     | ENSMUSG00000067780 | 74   | 15  | 180  | 121 | 89   | 17  | 105  | 28  |
| Piezo1   | ENSMUSG00000014444 | 764  | 311 | 1009 | 184 | 762  | 82  | 868  | 67  |
| Piezo2   | ENSMUSG00000041482 | 24   | 11  | 103  | 100 | 27   | 10  | 60   | 26  |
| Pif1     | ENSMUSG00000041064 | 7    | 7   | 20   | 9   | 7    | 4   | 13   | 5   |
| Pik3ap1  | ENSMUSG00000025017 | 55   | 12  | 132  | 58  | 64   | 10  | 102  | 14  |
| Pik3c2a  | ENSMUSG00000030660 | 644  | 90  | 821  | 49  | 571  | 41  | 614  | 49  |
| Pik3cd   | ENSMUSG00000039936 | 104  | 25  | 184  | 49  | 123  | 16  | 148  | 46  |
| Pik3cg   | ENSMUSG00000020573 | 96   | 11  | 139  | 24  | 110  | 14  | 125  | 19  |
| Pik3r5   | ENSMUSG00000020901 | 24   | 7   | 70   | 31  | 28   | 9   | 52   | 21  |
| Pkd2     | ENSMUSG00000034462 | 934  | 68  | 1341 | 308 | 928  | 43  | 1049 | 85  |
| Pkhd111  | ENSMUSG00000038725 | 113  | 45  | 211  | 84  | 195  | 90  | 172  | 61  |
| Pkn3     | ENSMUSG00000026785 | 143  | 28  | 220  | 23  | 138  | 15  | 195  | 21  |
| Plac8    | ENSMUSG00000029322 | 10   | 2   | 54   | 49  | 9    | 5   | 21   | 10  |
| Plau     | ENSMUSG00000021822 | 120  | 25  | 172  | 15  | 122  | 29  | 160  | 33  |
| Plaur    | ENSMUSG00000046223 | 36   | 7   | 71   | 21  | 37   | 23  | 64   | 15  |
| Pld4     | ENSMUSG00000052160 | 158  | 21  | 294  | 102 | 174  | 44  | 228  | 58  |
| Plekha4  | ENSMUSG00000040428 | 34   | 16  | 87   | 40  | 51   | 13  | 73   | 38  |
| Plk1     | ENSMUSG00000030867 | 19   | 10  | 48   | 16  | 17   | 7   | 40   | 14  |
| Plk4     | ENSMUSG00000025758 | 70   | 9   | 110  | 26  | 68   | 16  | 112  | 44  |
| Plod3    | ENSMUSG00000004846 | 475  | 118 | 658  | 87  | 472  | 51  | 605  | 62  |
| Plp2     | ENSMUSG00000031146 | 570  | 31  | 793  | 128 | 592  | 14  | 724  | 133 |
| Plpp1    | ENSMUSG00000021759 | 1000 | 50  | 1160 | 56  | 1013 | 21  | 1087 | 43  |
| Plxdc2   | ENSMUSG00000026748 | 599  | 71  | 840  | 221 | 565  | 51  | 696  | 96  |
| Pou2f2   | ENSMUSG00000008496 | 37   | 5   | 109  | 53  | 61   | 19  | 105  | 35  |
| Ppfia1   | ENSMUSG00000037519 | 773  | 148 | 999  | 166 | 867  | 163 | 931  | 191 |
| Ppfibp1  | ENSMUSG00000016487 | 1707 | 135 | 2004 | 276 | 1903 | 142 | 1868 | 195 |
| Ppib     | ENSMUSG00000032383 | 1085 | 51  | 1440 | 242 | 1046 | 78  | 1281 | 107 |
| Ppp1r15b | ENSMUSG00000046062 | 750  | 74  | 889  | 76  | 775  | 49  | 880  | 44  |
| Ppp1r18  | ENSMUSG00000034595 | 415  | 70  | 651  | 61  | 435  | 37  | 557  | 57  |
| Pqlc3    | ENSMUSG00000045679 | 95   | 9   | 171  | 87  | 101  | 15  | 126  | 18  |
| Prelp    | ENSMUSG00000041577 | 1273 | 232 | 1575 | 178 | 1325 | 81  | 1511 | 142 |
| Prex1    | ENSMUSG00000039621 | 261  | 20  | 427  | 60  | 278  | 27  | 341  | 38  |
| Prim1    | ENSMUSG00000025395 | 42   | 9   | 75   | 26  | 45   | 8   | 65   | 14  |
| Prkcd    | ENSMUSG00000021948 | 246  | 36  | 398  | 115 | 245  | 27  | 325  | 36  |
| Prr5l    | ENSMUSG00000032841 | 24   | 3   | 49   | 21  | 25   | 8   | 44   | 16  |
| Prrt4    | ENSMUSG00000079654 | 41   | 13  | 75   | 15  | 44   | 3   | 68   | 12  |
| Prss23   | ENSMUSG00000039405 | 314  | 52  | 488  | 126 | 314  | 35  | 361  | 78  |
| Pstpip1  | ENSMUSG00000032322 | 21   | 5   | 54   | 31  | 21   | 3   | 37   | 15  |
| Ptafr    | ENSMUSG00000056529 | 107  | 31  | 167  | 16  | 115  | 20  | 154  | 29  |
| Ptbp1    | ENSMUSG00000006498 | 741  | 116 | 1045 | 159 | 740  | 51  | 886  | 127 |
| Pthlh    | ENSMUSG00000048776 | 10   | 3   | 24   | 10  | 10   | 4   | 20   | 5   |
| Ptk2b    | ENSMUSG00000059456 | 161  | 11  | 248  | 52  | 179  | 24  | 246  | 35  |
| Ptk7     | ENSMUSG00000023972 | 64   | 11  | 121  | 51  | 79   | 10  | 101  | 16  |
| Ptms     | ENSMUSG00000030122 | 1096 | 180 | 1556 | 255 | 1175 | 69  | 1354 | 123 |
| Ptn      | ENSMUSG00000029838 | 35   | 10  | 527  | 950 | 47   | 13  | 109  | 85  |
| Ptpn1    | ENSMUSG00000027540 | 383  | 52  | 516  | 71  | 406  | 46  | 484  | 90  |
| Ptpn12   | ENSMUSG00000028771 | 720  | 48  | 925  | 82  | 719  | 64  | 779  | 35  |
| Ptpn18   | ENSMUSG00000026126 | 35   | 12  | 64   | 9   | 54   | 15  | 62   | 12  |
| Ptpn6    | ENSMUSG00000004266 | 114  | 27  | 202  | 70  | 107  | 24  | 164  | 25  |
| Ptprc    | ENSMUSG00000026395 | 246  | 49  | 533  | 285 | 234  | 45  | 382  | 129 |
| Ptpre    | ENSMUSG00000041836 | 163  | 23  | 260  | 20  | 183  | 21  | 214  | 24  |
| Ptprf    | ENSMUSG00000033295 | 111  | 21  | 196  | 66  | 107  | 19  | 177  | 20  |
| Rab23    | ENSMUSG00000004768 | 193  | 52  | 284  | 32  | 226  | 32  | 252  | 58  |
| Rab32    | ENSMUSG00000019832 | 40   | 12  | 85   | 42  | 46   | 3   | 70   | 12  |
| Rab3il1  | ENSMUSG00000024663 | 211  | 18  | 296  | 51  | 216  | 26  | 283  | 32  |
| Rab5c    | ENSMUSG00000019173 | 838  | 81  | 1059 | 21  | 918  | 29  | 1032 | 128 |
| Rab8b    | ENSMUSG00000036943 | 406  | 32  | 589  | 93  | 439  | 43  | 531  | 48  |
| Rad50    | ENSMUSG00000020380 | 310  | 33  | 381  | 31  | 339  | 21  | 385  | 26  |
| Rai14    | ENSMUSG00000022246 | 173  | 18  | 300  | 114 | 173  | 15  | 241  | 57  |
| Rap1b    | ENSMUSG00000052681 | 1590 | 124 | 2099 | 385 | 1642 | 155 | 1892 | 156 |

|           |                     |      |     |      |     |      |     |      |     |
|-----------|---------------------|------|-----|------|-----|------|-----|------|-----|
| Rasa4     | ENSMUSG0000004952   | 143  | 26  | 261  | 113 | 138  | 14  | 162  | 33  |
| Rbbp8     | ENSMUSG00000041238  | 177  | 8   | 233  | 32  | 161  | 22  | 196  | 17  |
| Rbm3      | ENSMUSG00000031167  | 1065 | 243 | 1408 | 328 | 1097 | 137 | 1294 | 160 |
| Rbp1      | ENSMUSG00000046402  | 203  | 16  | 395  | 267 | 185  | 21  | 311  | 56  |
| Reps2     | ENSMUSG00000040855  | 67   | 11  | 117  | 35  | 105  | 41  | 101  | 23  |
| Rflnb     | ENSMUSG00000020846  | 1333 | 290 | 1883 | 230 | 1446 | 172 | 1704 | 352 |
| Rfx7      | ENSMUSG00000037674  | 332  | 31  | 421  | 33  | 374  | 29  | 376  | 17  |
| Rgs10     | ENSMUSG00000030844  | 114  | 9   | 181  | 62  | 108  | 10  | 146  | 24  |
| Rhoa      | ENSMUSG00000007815  | 4789 | 93  | 5216 | 118 | 4862 | 194 | 5112 | 92  |
| Rhod      | ENSMUSG00000041845  | 59   | 10  | 92   | 15  | 68   | 16  | 66   | 10  |
| Rhoj      | ENSMUSG00000046768  | 564  | 95  | 704  | 75  | 573  | 74  | 656  | 48  |
| Rhou      | ENSMUSG00000039960  | 110  | 28  | 173  | 59  | 135  | 9   | 173  | 41  |
| Rnase6    | ENSMUSG00000021880  | 9    | 5   | 29   | 15  | 13   | 7   | 14   | 2   |
| Robo1     | ENSMUSG00000022883  | 56   | 11  | 110  | 44  | 68   | 14  | 97   | 13  |
| Rpl10-ps3 | ENSMUSG00000058443  | 1037 | 413 | 1554 | 348 | 1563 | 299 | 1415 | 424 |
| Rpl3      | ENSMUSG00000060036  | 3377 | 296 | 4471 | 607 | 3263 | 335 | 4320 | 344 |
| Rps6ka1   | ENSMUSG00000003644  | 155  | 10  | 219  | 28  | 140  | 11  | 177  | 26  |
| Rtn4      | ENSMUSG00000020458  | 1597 | 115 | 2738 | 963 | 1691 | 68  | 2291 | 384 |
| Rtp4      | ENSMUSG00000033355  | 158  | 33  | 260  | 39  | 177  | 33  | 212  | 32  |
| Runx1     | ENSMUSG00000022952  | 63   | 29  | 176  | 93  | 54   | 10  | 115  | 46  |
| Slpr2     | ENSMUSG00000043895  | 122  | 33  | 225  | 28  | 161  | 13  | 210  | 36  |
| Samd14    | ENSMUSG00000047181  | 37   | 7   | 72   | 30  | 41   | 5   | 56   | 15  |
| Samsn1    | ENSMUSG00000022876  | 14   | 3   | 34   | 12  | 17   | 4   | 26   | 8   |
| Sat1      | ENSMUSG00000025283  | 655  | 35  | 1037 | 357 | 699  | 101 | 854  | 124 |
| Sbno2     | ENSMUSG00000035673  | 285  | 44  | 452  | 89  | 290  | 31  | 409  | 72  |
| Scara3    | ENSMUSG000000034463 | 56   | 13  | 114  | 45  | 58   | 2   | 87   | 26  |
| Scd2      | ENSMUSG00000025203  | 637  | 102 | 838  | 65  | 763  | 157 | 803  | 46  |
| Scn1b     | ENSMUSG00000019194  | 235  | 13  | 365  | 140 | 268  | 19  | 330  | 60  |
| Scpep1    | ENSMUSG00000000278  | 287  | 48  | 480  | 174 | 308  | 44  | 404  | 65  |
| Scrn1     | ENSMUSG00000019124  | 212  | 35  | 302  | 33  | 202  | 45  | 226  | 61  |
| Scube3    | ENSMUSG000000038677 | 5    | 4   | 20   | 12  | 8    | 3   | 16   | 11  |
| Sdc1      | ENSMUSG00000020592  | 116  | 15  | 220  | 98  | 124  | 18  | 164  | 39  |
| Sdcbp     | ENSMUSG00000028249  | 2167 | 214 | 2679 | 438 | 2118 | 92  | 2530 | 189 |
| Sdk1      | ENSMUSG00000039683  | 24   | 3   | 57   | 13  | 40   | 21  | 57   | 22  |
| Sec16b    | ENSMUSG00000026589  | 57   | 7   | 120  | 43  | 63   | 10  | 73   | 13  |
| Sele      | ENSMUSG00000026582  | 35   | 8   | 70   | 23  | 43   | 4   | 63   | 17  |
| Selplg    | ENSMUSG00000048163  | 63   | 15  | 127  | 38  | 67   | 10  | 99   | 16  |
| Sema6d    | ENSMUSG00000027200  | 1026 | 136 | 1377 | 210 | 1090 | 137 | 1238 | 97  |
| Serp1     | ENSMUSG00000027808  | 586  | 74  | 881  | 294 | 591  | 79  | 738  | 92  |
| Serpina3g | ENSMUSG00000041481  | 9    | 5   | 29   | 16  | 12   | 5   | 21   | 10  |
| Serpina3i | ENSMUSG00000079014  | 3    | 2   | 17   | 15  | 2    | 2   | 10   | 8   |
| Serpina3n | ENSMUSG00000021091  | 176  | 100 | 698  | 430 | 134  | 41  | 495  | 374 |
| Serpina1a | ENSMUSG00000044734  | 77   | 13  | 216  | 200 | 93   | 25  | 137  | 59  |
| Serpine1  | ENSMUSG00000037411  | 794  | 250 | 1688 | 848 | 832  | 284 | 1309 | 495 |
| Serpine2  | ENSMUSG00000026249  | 478  | 38  | 814  | 242 | 497  | 57  | 623  | 60  |
| Serping1  | ENSMUSG00000023224  | 1822 | 273 | 2473 | 457 | 1827 | 186 | 2279 | 296 |
| Sertad4   | ENSMUSG00000016262  | 105  | 17  | 221  | 144 | 112  | 18  | 169  | 32  |
| Sfrp1     | ENSMUSG00000031548  | 345  | 30  | 981  | 861 | 365  | 40  | 683  | 270 |
| Sfrp2     | ENSMUSG00000027996  | 43   | 4   | 313  | 445 | 47   | 8   | 154  | 132 |
| Sfxn3     | ENSMUSG00000025212  | 216  | 19  | 310  | 29  | 224  | 5   | 272  | 31  |
| Sgce      | ENSMUSG00000004631  | 294  | 28  | 387  | 53  | 287  | 38  | 342  | 18  |
| Sh3bgrl   | ENSMUSG00000031246  | 918  | 89  | 1283 | 246 | 887  | 122 | 1015 | 78  |
| Shc2      | ENSMUSG00000020312  | 50   | 9   | 88   | 30  | 52   | 6   | 71   | 5   |
| Shcbp1    | ENSMUSG00000022322  | 19   | 11  | 66   | 49  | 19   | 6   | 42   | 16  |
| Shisa4    | ENSMUSG00000041889  | 45   | 8   | 85   | 28  | 49   | 10  | 83   | 18  |
| Shisa5    | ENSMUSG00000025647  | 705  | 100 | 1028 | 56  | 749  | 29  | 862  | 118 |
| Shtn1     | ENSMUSG00000041362  | 111  | 11  | 174  | 21  | 133  | 10  | 158  | 33  |
| Siglece   | ENSMUSG00000030474  | 31   | 11  | 61   | 22  | 29   | 7   | 49   | 8   |
| Sirpa     | ENSMUSG00000037902  | 816  | 78  | 1138 | 211 | 857  | 29  | 986  | 159 |
| Ska1      | ENSMUSG00000036223  | 3    | 3   | 16   | 11  | 2    | 2   | 11   | 8   |
| Ska3      | ENSMUSG00000021965  | 7    | 5   | 20   | 4   | 7    | 1   | 19   | 6   |
| Skil      | ENSMUSG00000027660  | 581  | 92  | 881  | 203 | 556  | 78  | 727  | 130 |
| Skp2      | ENSMUSG00000054115  | 26   | 2   | 53   | 9   | 32   | 9   | 43   | 12  |
| Sla       | ENSMUSG00000022372  | 69   | 14  | 123  | 46  | 60   | 7   | 74   | 15  |
| Slamf7    | ENSMUSG00000038179  | 16   | 7   | 59   | 44  | 20   | 9   | 31   | 22  |
| Slbp      | ENSMUSG00000004642  | 270  | 27  | 364  | 58  | 264  | 33  | 311  | 22  |
| Slc15a3   | ENSMUSG00000024737  | 89   | 19  | 150  | 23  | 90   | 18  | 130  | 28  |

|          |                    |      |     |      |     |      |     |      |     |
|----------|--------------------|------|-----|------|-----|------|-----|------|-----|
| Slc20a1  | ENSMUSG00000027397 | 373  | 83  | 570  | 141 | 383  | 75  | 430  | 73  |
| Slc25a24 | ENSMUSG00000040322 | 184  | 16  | 278  | 63  | 197  | 22  | 246  | 35  |
| Slc25a45 | ENSMUSG00000024818 | 85   | 11  | 134  | 30  | 87   | 26  | 111  | 13  |
| Slc39a6  | ENSMUSG00000024270 | 135  | 18  | 213  | 64  | 147  | 13  | 187  | 32  |
| Slc7a8   | ENSMUSG00000022180 | 85   | 8   | 120  | 20  | 95   | 6   | 114  | 11  |
| Slc9a1   | ENSMUSG00000028854 | 394  | 28  | 509  | 56  | 454  | 36  | 435  | 54  |
| Slc9a9   | ENSMUSG00000031129 | 122  | 18  | 169  | 14  | 122  | 7   | 161  | 18  |
| Slco2a1  | ENSMUSG00000032548 | 79   | 12  | 158  | 76  | 109  | 32  | 151  | 52  |
| Slfn1    | ENSMUSG00000078763 | 6    | 3   | 30   | 22  | 7    | 4   | 14   | 5   |
| Slfn4    | ENSMUSG00000000204 | 4    | 3   | 37   | 45  | 3    | 3   | 7    | 6   |
| Slfn8    | ENSMUSG00000035208 | 92   | 15  | 162  | 48  | 81   | 9   | 133  | 41  |
| Smc4     | ENSMUSG00000034349 | 507  | 95  | 871  | 221 | 482  | 64  | 678  | 208 |
| Smg1     | ENSMUSG00000030655 | 1722 | 260 | 2176 | 77  | 1762 | 176 | 1909 | 93  |
| Snhg18   | ENSMUSG00000096956 | 105  | 9   | 186  | 61  | 111  | 26  | 157  | 23  |
| Snx18    | ENSMUSG00000042364 | 553  | 47  | 696  | 92  | 562  | 61  | 610  | 52  |
| Snx20    | ENSMUSG00000031662 | 19   | 11  | 47   | 15  | 23   | 2   | 34   | 9   |
| Snx5     | ENSMUSG00000027423 | 1439 | 125 | 1707 | 156 | 1541 | 86  | 1646 | 122 |
| Soat1    | ENSMUSG00000026600 | 139  | 29  | 253  | 90  | 127  | 33  | 216  | 79  |
| Sp3      | ENSMUSG00000027109 | 1028 | 55  | 1219 | 141 | 1088 | 81  | 1139 | 66  |
| Spi1     | ENSMUSG00000002111 | 75   | 11  | 144  | 49  | 95   | 22  | 131  | 8   |
| Spidr    | ENSMUSG00000041974 | 67   | 16  | 111  | 18  | 68   | 12  | 82   | 12  |
| Spin4    | ENSMUSG00000071722 | 30   | 7   | 51   | 5   | 34   | 7   | 38   | 7   |
| Spn      | ENSMUSG00000051457 | 31   | 12  | 75   | 26  | 34   | 10  | 54   | 21  |
| Spp1     | ENSMUSG00000029304 | 7    | 3   | 219  | 250 | 5    | 2   | 107  | 189 |
| Spred1   | ENSMUSG00000027351 | 771  | 71  | 991  | 172 | 810  | 79  | 960  | 76  |
| Sprr2a2  | ENSMUSG00000068893 | 5    | 4   | 45   | 45  | 7    | 3   | 19   | 6   |
| Spty2d1  | ENSMUSG00000049516 | 303  | 36  | 432  | 55  | 340  | 21  | 357  | 39  |
| Sqle     | ENSMUSG00000022351 | 22   | 13  | 44   | 9   | 32   | 12  | 32   | 12  |
| Srgap1   | ENSMUSG00000020121 | 122  | 17  | 179  | 21  | 119  | 24  | 155  | 30  |
| Ssh1     | ENSMUSG00000042121 | 389  | 56  | 482  | 27  | 429  | 54  | 403  | 41  |
| St14     | ENSMUSG00000031995 | 4    | 1   | 21   | 10  | 6    | 4   | 18   | 19  |
| Star     | ENSMUSG00000031574 | 18   | 11  | 140  | 152 | 32   | 27  | 93   | 89  |
| Stk26    | ENSMUSG00000031112 | 14   | 4   | 39   | 26  | 33   | 20  | 26   | 15  |
| Stk32c   | ENSMUSG00000015981 | 20   | 5   | 41   | 5   | 22   | 5   | 29   | 4   |
| Stt3a    | ENSMUSG00000032116 | 850  | 44  | 1211 | 182 | 933  | 75  | 948  | 77  |
| Stxbp2   | ENSMUSG00000004626 | 39   | 12  | 87   | 17  | 33   | 5   | 50   | 10  |
| Sulf2    | ENSMUSG00000006800 | 1067 | 166 | 1425 | 253 | 1164 | 107 | 1386 | 119 |
| Susd2    | ENSMUSG00000006342 | 39   | 13  | 86   | 24  | 45   | 10  | 49   | 10  |
| Susd5    | ENSMUSG00000086596 | 20   | 9   | 62   | 31  | 26   | 9   | 31   | 13  |
| Synpo    | ENSMUSG00000043079 | 2231 | 119 | 2747 | 352 | 2295 | 170 | 2766 | 301 |
| Syt12    | ENSMUSG00000049303 | 54   | 21  | 128  | 28  | 50   | 24  | 89   | 45  |
| Tagln    | ENSMUSG00000032085 | 483  | 160 | 931  | 216 | 458  | 122 | 542  | 128 |
| Taok3    | ENSMUSG00000061288 | 238  | 28  | 320  | 48  | 253  | 36  | 307  | 26  |
| Tbpl1    | ENSMUSG00000071359 | 277  | 18  | 347  | 9   | 269  | 16  | 294  | 34  |
| Tbx15    | ENSMUSG00000027868 | 14   | 5   | 36   | 21  | 18   | 11  | 36   | 10  |
| Tbxas1   | ENSMUSG00000029925 | 62   | 14  | 104  | 27  | 75   | 23  | 89   | 12  |
| Tcaf1    | ENSMUSG00000036667 | 298  | 59  | 423  | 88  | 292  | 16  | 368  | 39  |
| Tceal9   | ENSMUSG00000042712 | 276  | 42  | 454  | 184 | 290  | 28  | 356  | 21  |
| Tcirg1   | ENSMUSG00000001750 | 143  | 21  | 252  | 50  | 181  | 41  | 211  | 53  |
| Tent5a   | ENSMUSG00000032265 | 352  | 77  | 521  | 110 | 348  | 40  | 469  | 106 |
| Tent5c   | ENSMUSG00000044468 | 180  | 62  | 415  | 151 | 316  | 121 | 530  | 280 |
| Tep1     | ENSMUSG00000006281 | 281  | 10  | 425  | 52  | 275  | 19  | 343  | 44  |
| Tgfb1i1  | ENSMUSG00000030782 | 331  | 73  | 487  | 33  | 326  | 41  | 417  | 38  |
| Tgfb3    | ENSMUSG00000021253 | 358  | 51  | 819  | 586 | 360  | 30  | 577  | 163 |
| Tgfbr1   | ENSMUSG00000007613 | 473  | 61  | 783  | 295 | 536  | 62  | 608  | 144 |
| Tgfbr2   | ENSMUSG00000032440 | 1323 | 221 | 1904 | 229 | 1360 | 84  | 1637 | 48  |
| Tgif2    | ENSMUSG00000062175 | 15   | 4   | 33   | 9   | 22   | 11  | 27   | 10  |
| Themis2  | ENSMUSG00000037731 | 94   | 14  | 167  | 25  | 103  | 12  | 120  | 24  |
| Thoc1    | ENSMUSG00000024287 | 393  | 27  | 507  | 81  | 425  | 40  | 457  | 36  |
| Tifab    | ENSMUSG00000049625 | 51   | 11  | 93   | 26  | 49   | 6   | 72   | 19  |
| Tlr1     | ENSMUSG00000044827 | 25   | 12  | 79   | 59  | 23   | 4   | 49   | 22  |
| Tlr2     | ENSMUSG00000027995 | 103  | 10  | 196  | 69  | 107  | 15  | 152  | 23  |
| Tlr6     | ENSMUSG00000051498 | 15   | 4   | 36   | 10  | 18   | 9   | 18   | 10  |
| Tlr7     | ENSMUSG00000044583 | 100  | 10  | 218  | 51  | 119  | 44  | 182  | 57  |
| Tm6sf1   | ENSMUSG00000038623 | 189  | 36  | 283  | 38  | 193  | 35  | 228  | 22  |
| Tmem119  | ENSMUSG00000054675 | 65   | 21  | 180  | 126 | 65   | 6   | 118  | 38  |
| Tmem132a | ENSMUSG00000024736 | 173  | 25  | 238  | 29  | 190  | 15  | 225  | 33  |

|          |                    |      |     |      |     |      |     |      |     |
|----------|--------------------|------|-----|------|-----|------|-----|------|-----|
| Tmem165  | ENSMUSG00000029234 | 367  | 42  | 504  | 119 | 398  | 39  | 467  | 29  |
| Tmem184c | ENSMUSG00000031617 | 277  | 31  | 380  | 62  | 313  | 36  | 352  | 23  |
| Tmem198b | ENSMUSG00000047090 | 101  | 18  | 156  | 32  | 99   | 12  | 129  | 16  |
| Tmem273  | ENSMUSG00000041707 | 12   | 5   | 33   | 15  | 17   | 6   | 24   | 6   |
| Tmem45a  | ENSMUSG00000022754 | 60   | 25  | 158  | 66  | 68   | 11  | 112  | 16  |
| Tmem51   | ENSMUSG00000040616 | 54   | 4   | 82   | 7   | 68   | 8   | 69   | 12  |
| Tnfrsf1b | ENSMUSG00000028599 | 240  | 51  | 378  | 73  | 263  | 41  | 340  | 52  |
| Tnnt3    | ENSMUSG00000061723 | 6    | 2   | 29   | 39  | 5    | 3   | 17   | 17  |
| Tns3     | ENSMUSG00000020422 | 616  | 54  | 885  | 194 | 633  | 54  | 721  | 71  |
| Tor3a    | ENSMUSG00000060519 | 274  | 45  | 395  | 49  | 295  | 22  | 340  | 25  |
| Tram2    | ENSMUSG00000041779 | 231  | 36  | 333  | 42  | 225  | 59  | 272  | 55  |
| Trf      | ENSMUSG00000032554 | 860  | 217 | 1129 | 103 | 862  | 83  | 1027 | 78  |
| Trim30a  | ENSMUSG00000030921 | 325  | 27  | 481  | 93  | 321  | 43  | 427  | 50  |
| Trip13   | ENSMUSG00000021569 | 9    | 5   | 30   | 12  | 10   | 2   | 26   | 8   |
| Trp53i11 | ENSMUSG00000068735 | 646  | 173 | 926  | 105 | 688  | 75  | 760  | 211 |
| Tshz3    | ENSMUSG00000021217 | 83   | 14  | 129  | 7   | 86   | 15  | 111  | 16  |
| Tsku     | ENSMUSG00000049580 | 67   | 12  | 104  | 26  | 53   | 7   | 91   | 27  |
| Tspan18  | ENSMUSG00000027217 | 290  | 49  | 403  | 41  | 317  | 28  | 366  | 89  |
| Tspo     | ENSMUSG00000041736 | 297  | 21  | 484  | 201 | 308  | 28  | 397  | 63  |
| Ttyh3    | ENSMUSG00000036565 | 273  | 38  | 397  | 63  | 320  | 15  | 336  | 32  |
| Tubb2b   | ENSMUSG00000045136 | 49   | 15  | 127  | 28  | 62   | 34  | 105  | 43  |
| Txndc5   | ENSMUSG00000038991 | 889  | 51  | 1133 | 196 | 889  | 39  | 1068 | 85  |
| Ube216   | ENSMUSG00000027078 | 317  | 72  | 521  | 98  | 342  | 63  | 524  | 145 |
| Uchl1    | ENSMUSG00000029223 | 115  | 13  | 232  | 135 | 124  | 16  | 194  | 68  |
| Ugdh     | ENSMUSG00000029201 | 332  | 33  | 438  | 36  | 370  | 92  | 419  | 88  |
| Upp1     | ENSMUSG00000020407 | 78   | 13  | 127  | 37  | 87   | 15  | 115  | 29  |
| Usp18    | ENSMUSG00000030107 | 82   | 19  | 133  | 27  | 74   | 13  | 106  | 20  |
| Usp6nl   | ENSMUSG00000039046 | 217  | 31  | 297  | 27  | 260  | 46  | 269  | 17  |
| Vash1    | ENSMUSG00000021256 | 340  | 36  | 487  | 83  | 322  | 15  | 460  | 115 |
| Vasn     | ENSMUSG00000039646 | 131  | 17  | 195  | 17  | 135  | 19  | 160  | 13  |
| Vasp     | ENSMUSG00000030403 | 602  | 62  | 764  | 80  | 624  | 92  | 708  | 80  |
| Vgll3    | ENSMUSG00000091243 | 127  | 49  | 249  | 84  | 167  | 31  | 215  | 72  |
| Vsir     | ENSMUSG00000020101 | 544  | 130 | 797  | 85  | 643  | 20  | 694  | 88  |
| Was      | ENSMUSG00000031165 | 34   | 9   | 71   | 17  | 40   | 6   | 48   | 12  |
| Wipf1    | ENSMUSG00000075284 | 572  | 54  | 783  | 47  | 562  | 70  | 635  | 43  |
| Wispl    | ENSMUSG00000005124 | 27   | 8   | 174  | 241 | 30   | 12  | 82   | 66  |
| Wnt9b    | ENSMUSG00000018486 | 9    | 5   | 34   | 16  | 8    | 4   | 21   | 10  |
| Wsb1     | ENSMUSG00000017677 | 413  | 65  | 588  | 117 | 430  | 59  | 499  | 86  |
| Wwtr1    | ENSMUSG00000027803 | 1788 | 70  | 2201 | 189 | 1899 | 86  | 2118 | 63  |
| Xaf1     | ENSMUSG00000040483 | 194  | 44  | 280  | 32  | 185  | 32  | 215  | 10  |
| Xcr1     | ENSMUSG00000060509 | 4    | 4   | 16   | 13  | 3    | 2   | 5    | 4   |
| Yes1     | ENSMUSG00000014932 | 493  | 48  | 631  | 79  | 517  | 38  | 549  | 53  |
| Yipf5    | ENSMUSG00000024487 | 306  | 19  | 418  | 92  | 321  | 20  | 373  | 55  |
| Ywhaq    | ENSMUSG00000076432 | 1324 | 72  | 1556 | 97  | 1256 | 62  | 1410 | 136 |
| Zbp1     | ENSMUSG00000027514 | 37   | 19  | 92   | 33  | 37   | 4   | 63   | 13  |
| Zdhhc20  | ENSMUSG00000021969 | 297  | 35  | 512  | 168 | 404  | 125 | 438  | 107 |
| Zfas1    | ENSMUSG00000074578 | 115  | 9   | 200  | 96  | 116  | 17  | 147  | 30  |
| Zfp185   | ENSMUSG00000031351 | 15   | 3   | 69   | 100 | 28   | 22  | 34   | 12  |
| Zfp3612  | ENSMUSG00000045817 | 834  | 75  | 1082 | 70  | 960  | 66  | 1042 | 116 |
| Zfp385b  | ENSMUSG00000027016 | 105  | 21  | 153  | 38  | 106  | 21  | 148  | 29  |
| Zfp948   | ENSMUSG00000067931 | 153  | 16  | 226  | 55  | 139  | 21  | 197  | 20  |
| Zmat3    | ENSMUSG00000027663 | 267  | 23  | 355  | 37  | 287  | 4   | 337  | 50  |

**Supplementary Table S6.** RNASeq analysis of effects of angiotensin II (AngII) on mRNA expression in hearts from PKN2Het vs WT littermates: mRNAs significantly downregulated by AngII in WT hearts.

| Gene Symbol   | Ensembl gene id    | WT Vehicle |      | WT AngII |      | PKN2Het Vehicle |      | PKN2Het AngII |      |
|---------------|--------------------|------------|------|----------|------|-----------------|------|---------------|------|
|               |                    | Mean       | SD   | Mean     | SD   | Mean            | SD   | Mean          | SD   |
| 0610040J01Rik | ENSMUSG00000060512 | 86         | 12   | 50       | 19   | 78              | 10   | 62            | 9    |
| 1600014C10Rik | ENSMUSG00000054676 | 741        | 15   | 595      | 54   | 669             | 41   | 652           | 77   |
| 1700123M08Rik | ENSMUSG00000085614 | 65         | 5    | 40       | 9    | 59              | 6    | 47            | 7    |
| 2010001K21Rik | ENSMUSG00000051606 | 55         | 21   | 18       | 7    | 54              | 24   | 32            | 15   |
| 2310015K22Rik | ENSMUSG00000101257 | 17         | 5    | 5        | 2    | 14              | 3    | 6             | 4    |
| 2700097O09Rik | ENSMUSG00000062198 | 195        | 23   | 141      | 15   | 172             | 25   | 159           | 20   |
| 2900097C17Rik | ENSMUSG00000102869 | 6799       | 384  | 5461     | 338  | 6885            | 478  | 6050          | 659  |
| 5830417I10Rik | ENSMUSG00000078684 | 1015       | 96   | 743      | 87   | 964             | 152  | 776           | 61   |
| A330023F24Rik | ENSMUSG00000096929 | 201        | 38   | 119      | 33   | 138             | 27   | 115           | 44   |
| Abcb10        | ENSMUSG00000031974 | 999        | 42   | 743      | 124  | 1019            | 76   | 871           | 93   |
| Abcb8         | ENSMUSG00000028973 | 1023       | 86   | 729      | 145  | 1062            | 134  | 871           | 63   |
| Abcd3         | ENSMUSG00000028127 | 2749       | 274  | 2096     | 283  | 2698            | 193  | 2334          | 334  |
| Abhd10        | ENSMUSG00000033157 | 265        | 34   | 203      | 14   | 258             | 14   | 237           | 14   |
| AC131339.2    | ENSMUSG00000116656 | 8254       | 1201 | 5715     | 1421 | 7792            | 541  | 6468          | 972  |
| Acaa2         | ENSMUSG00000036880 | 13252      | 1380 | 8259     | 2391 | 12324           | 1059 | 9258          | 1215 |
| Acacb         | ENSMUSG00000042010 | 7443       | 571  | 5153     | 1077 | 7777            | 973  | 6190          | 276  |
| Acad12        | ENSMUSG00000042647 | 1869       | 179  | 1262     | 208  | 1828            | 141  | 1493          | 156  |
| Acad8         | ENSMUSG00000031969 | 768        | 60   | 549      | 63   | 690             | 83   | 672           | 41   |
| Acadm         | ENSMUSG00000062908 | 23340      | 1838 | 16479    | 3425 | 22611           | 922  | 17864         | 1871 |
| Acads         | ENSMUSG00000029545 | 2580       | 67   | 1841     | 326  | 2630            | 310  | 2033          | 223  |
| Acadsb        | ENSMUSG00000030861 | 2976       | 193  | 2400     | 192  | 2851            | 242  | 2623          | 299  |
| Acadv1        | ENSMUSG00000018574 | 16703      | 1281 | 11802    | 3040 | 16035           | 839  | 13194         | 640  |
| Acat1         | ENSMUSG00000032047 | 11595      | 1306 | 8601     | 2045 | 11394           | 1310 | 9863          | 770  |
| Aco2          | ENSMUSG00000022477 | 41047      | 2512 | 30674    | 4778 | 41075           | 2487 | 35785         | 2269 |
| Acot2         | ENSMUSG00000021226 | 1314       | 144  | 912      | 240  | 1349            | 225  | 975           | 53   |
| Acot7         | ENSMUSG00000028937 | 819        | 45   | 640      | 57   | 804             | 63   | 691           | 52   |
| Acox1         | ENSMUSG00000020777 | 5964       | 375  | 4807     | 434  | 5983            | 629  | 5289          | 513  |
| Acp6          | ENSMUSG00000028093 | 375        | 19   | 285      | 28   | 360             | 30   | 302           | 31   |
| Acs11         | ENSMUSG00000018796 | 21401      | 1598 | 15516    | 3710 | 21505           | 1628 | 18159         | 1993 |
| Acs16         | ENSMUSG00000020333 | 322        | 47   | 199      | 38   | 318             | 50   | 264           | 61   |
| Acsm5         | ENSMUSG00000030972 | 83         | 17   | 31       | 11   | 61              | 9    | 36            | 8    |
| Acy3          | ENSMUSG00000024866 | 300        | 15   | 192      | 35   | 310             | 25   | 238           | 34   |
| Adamts7       | ENSMUSG00000032363 | 320        | 21   | 222      | 35   | 323             | 29   | 246           | 59   |
| Adck1         | ENSMUSG00000021044 | 486        | 19   | 381      | 49   | 484             | 24   | 447           | 35   |
| Adcy1         | ENSMUSG00000020431 | 128        | 33   | 66       | 23   | 142             | 11   | 108           | 33   |
| Adhfe1        | ENSMUSG00000025911 | 1463       | 160  | 926      | 241  | 1480            | 91   | 1152          | 46   |
| Adipor2       | ENSMUSG00000030168 | 2471       | 47   | 2151     | 151  | 2493            | 164  | 2345          | 116  |
| Adralb        | ENSMUSG00000050541 | 489        | 73   | 272      | 64   | 473             | 98   | 320           | 63   |
| Afg11         | ENSMUSG00000038302 | 1113       | 135  | 844      | 176  | 1027            | 95   | 958           | 51   |
| Afg311        | ENSMUSG00000031967 | 1302       | 67   | 991      | 162  | 1222            | 123  | 1128          | 81   |
| Afg312        | ENSMUSG00000024527 | 3400       | 269  | 2686     | 386  | 3367            | 188  | 3160          | 98   |
| Agl           | ENSMUSG00000033400 | 6620       | 574  | 5262     | 429  | 6615            | 587  | 5784          | 471  |
| Agtppb1       | ENSMUSG00000021557 | 3401       | 239  | 2676     | 267  | 3243            | 152  | 2747          | 370  |
| Agtr1a        | ENSMUSG00000049115 | 735        | 120  | 525      | 56   | 733             | 94   | 602           | 75   |
| AI464131      | ENSMUSG00000046312 | 274        | 30   | 170      | 37   | 300             | 45   | 212           | 57   |
| Ak1           | ENSMUSG00000026817 | 8786       | 736  | 6676     | 1141 | 8306            | 245  | 7478          | 570  |
| Ak3           | ENSMUSG00000024782 | 2865       | 206  | 2428     | 194  | 2737            | 50   | 2646          | 143  |
| Akap1         | ENSMUSG00000018428 | 3302       | 350  | 2545     | 516  | 3554            | 412  | 3012          | 130  |
| Akr1b3        | ENSMUSG00000001642 | 4099       | 333  | 3107     | 569  | 4024            | 229  | 3471          | 308  |
| Akr1e1        | ENSMUSG00000045410 | 600        | 74   | 471      | 42   | 501             | 55   | 559           | 71   |
| Akr7a5        | ENSMUSG00000028743 | 466        | 29   | 337      | 42   | 459             | 49   | 383           | 48   |
| Akt2          | ENSMUSG00000004056 | 3610       | 431  | 2539     | 315  | 3460            | 299  | 2896          | 149  |
| Aktip         | ENSMUSG00000031667 | 1230       | 73   | 958      | 87   | 1211            | 51   | 1043          | 104  |
| Aldh5a1       | ENSMUSG00000035936 | 1096       | 126  | 715      | 113  | 1087            | 105  | 893           | 121  |
| Aldoa         | ENSMUSG00000030695 | 35858      | 1289 | 30804    | 2263 | 36705           | 2352 | 34386         | 2290 |
| Alkbh5        | ENSMUSG00000042650 | 2176       | 139  | 1835     | 156  | 2250            | 270  | 1962          | 35   |
| Alkbh7        | ENSMUSG00000002661 | 389        | 36   | 284      | 50   | 398             | 51   | 341           | 39   |
| Amd1          | ENSMUSG00000075232 | 2921       | 695  | 1957     | 248  | 2352            | 376  | 2046          | 448  |
| Anapc13       | ENSMUSG00000035048 | 991        | 52   | 835      | 73   | 936             | 44   | 898           | 50   |

|               |                    |       |      |       |      |       |      |       |      |
|---------------|--------------------|-------|------|-------|------|-------|------|-------|------|
| Ank           | ENSMUSG00000022265 | 4065  | 84   | 3017  | 442  | 4145  | 294  | 3446  | 202  |
| Ank2          | ENSMUSG00000032826 | 3236  | 377  | 2426  | 262  | 3245  | 406  | 2934  | 430  |
| Anks1         | ENSMUSG00000024219 | 1418  | 123  | 1011  | 201  | 1347  | 177  | 1118  | 141  |
| Anxa1         | ENSMUSG00000021866 | 1492  | 129  | 1141  | 185  | 1489  | 130  | 1259  | 107  |
| Apba3         | ENSMUSG00000004931 | 676   | 58   | 507   | 64   | 671   | 72   | 610   | 77   |
| Apobec2       | ENSMUSG00000040694 | 3232  | 195  | 2680  | 271  | 3255  | 84   | 2930  | 192  |
| Arfgap2       | ENSMUSG00000027255 | 1072  | 50   | 921   | 18   | 1095  | 72   | 979   | 38   |
| Arhgap26      | ENSMUSG00000036452 | 1156  | 166  | 889   | 88   | 1003  | 90   | 905   | 186  |
| Arhgef17      | ENSMUSG00000032875 | 1622  | 105  | 1309  | 145  | 1648  | 171  | 1396  | 65   |
| Arhgef19      | ENSMUSG00000028919 | 631   | 130  | 395   | 97   | 630   | 134  | 502   | 132  |
| Arl2          | ENSMUSG00000024944 | 429   | 20   | 345   | 25   | 432   | 32   | 371   | 18   |
| Armc2         | ENSMUSG00000071324 | 597   | 48   | 445   | 104  | 615   | 73   | 517   | 100  |
| Art3          | ENSMUSG00000034842 | 4846  | 519  | 3712  | 598  | 4603  | 497  | 4111  | 546  |
| Art5          | ENSMUSG00000070424 | 186   | 40   | 126   | 25   | 137   | 17   | 109   | 25   |
| As3mt         | ENSMUSG00000003559 | 1028  | 40   | 757   | 113  | 983   | 51   | 838   | 64   |
| Asb18         | ENSMUSG00000067081 | 499   | 48   | 355   | 63   | 568   | 74   | 485   | 101  |
| Asb8          | ENSMUSG00000048175 | 1440  | 34   | 1106  | 130  | 1405  | 108  | 1243  | 39   |
| Atp5a1        | ENSMUSG00000025428 | 73890 | 5007 | 52519 | 8597 | 73310 | 4969 | 61155 | 3605 |
| Atp5b         | ENSMUSG00000025393 | 81983 | 4027 | 60525 | 7907 | 80175 | 3926 | 68956 | 5579 |
| Atp5d         | ENSMUSG00000003072 | 5810  | 313  | 4470  | 769  | 5730  | 539  | 5074  | 535  |
| Atp5e         | ENSMUSG00000016252 | 4682  | 460  | 3624  | 408  | 4707  | 229  | 4130  | 508  |
| Atp5g3        | ENSMUSG00000018770 | 18004 | 1331 | 13448 | 2291 | 18271 | 996  | 15327 | 1271 |
| Atp5o         | ENSMUSG00000022956 | 14204 | 841  | 11103 | 1882 | 13615 | 536  | 12332 | 665  |
| Atrip         | ENSMUSG00000025646 | 240   | 48   | 178   | 13   | 214   | 7    | 169   | 22   |
| Auh           | ENSMUSG00000021460 | 1320  | 84   | 937   | 128  | 1302  | 50   | 1114  | 103  |
| B4gat1        | ENSMUSG00000047379 | 686   | 31   | 550   | 51   | 714   | 60   | 593   | 58   |
| Banf2os       | ENSMUSG00000086384 | 37    | 10   | 18    | 9    | 34    | 8    | 23    | 6    |
| Bap1          | ENSMUSG00000021901 | 906   | 50   | 726   | 88   | 873   | 45   | 830   | 87   |
| BB218582      | ENSMUSG00000085218 | 104   | 20   | 66    | 19   | 93    | 12   | 74    | 18   |
| BC025920      | ENSMUSG00000074862 | 63    | 12   | 38    | 10   | 58    | 6    | 40    | 6    |
| Bcas2         | ENSMUSG00000005687 | 603   | 47   | 499   | 33   | 607   | 16   | 526   | 34   |
| Bcat2         | ENSMUSG00000030826 | 1208  | 96   | 917   | 126  | 1160  | 104  | 1012  | 77   |
| Bcl2l13       | ENSMUSG00000009112 | 1949  | 142  | 1520  | 239  | 2093  | 293  | 1695  | 182  |
| Bsg           | ENSMUSG00000023175 | 18883 | 1349 | 15208 | 1807 | 18987 | 778  | 17057 | 1251 |
| Btbd2         | ENSMUSG00000003344 | 522   | 41   | 395   | 30   | 524   | 83   | 414   | 33   |
| Bzw2          | ENSMUSG00000020547 | 2728  | 225  | 2062  | 260  | 2680  | 103  | 2352  | 189  |
| C030006K11Rik | ENSMUSG00000116138 | 646   | 57   | 430   | 81   | 638   | 91   | 512   | 103  |
| C530005A16Rik | ENSMUSG00000085408 | 50    | 10   | 25    | 6    | 47    | 2    | 34    | 5    |
| Cacfd1        | ENSMUSG00000015488 | 733   | 54   | 563   | 73   | 706   | 29   | 560   | 60   |
| Cacnb2        | ENSMUSG00000057914 | 1546  | 266  | 1014  | 149  | 1369  | 192  | 1040  | 154  |
| Cacng6        | ENSMUSG00000078815 | 34    | 9    | 13    | 6    | 28    | 11   | 13    | 6    |
| Cadm4         | ENSMUSG00000054793 | 295   | 26   | 180   | 39   | 288   | 32   | 216   | 22   |
| Calr3         | ENSMUSG00000019732 | 237   | 30   | 185   | 7    | 218   | 18   | 193   | 10   |
| Cars2         | ENSMUSG00000056228 | 540   | 40   | 408   | 58   | 563   | 48   | 458   | 53   |
| Ccdc85c       | ENSMUSG00000084883 | 758   | 52   | 536   | 118  | 780   | 117  | 613   | 80   |
| Ccl11         | ENSMUSG00000020676 | 47    | 16   | 18    | 6    | 28    | 8    | 22    | 12   |
| Cd59a         | ENSMUSG00000032679 | 1574  | 127  | 1303  | 120  | 1547  | 105  | 1280  | 69   |
| Cd99l2        | ENSMUSG00000035776 | 1839  | 81   | 1579  | 95   | 1863  | 109  | 1697  | 59   |
| Cdh2          | ENSMUSG00000024304 | 7013  | 593  | 5762  | 276  | 7154  | 806  | 6155  | 511  |
| Cdip1         | ENSMUSG00000004071 | 1222  | 78   | 994   | 157  | 1254  | 99   | 1121  | 69   |
| Cdkl5         | ENSMUSG00000031292 | 275   | 46   | 190   | 15   | 246   | 19   | 225   | 37   |
| Cdkn1c        | ENSMUSG00000037664 | 381   | 66   | 236   | 40   | 329   | 26   | 256   | 83   |
| Cds2          | ENSMUSG00000058793 | 4266  | 154  | 3435  | 371  | 4238  | 261  | 3575  | 214  |
| Cep128        | ENSMUSG00000061533 | 288   | 24   | 199   | 59   | 257   | 34   | 220   | 53   |
| Cep63         | ENSMUSG00000032534 | 767   | 47   | 629   | 48   | 738   | 59   | 684   | 37   |
| Ces1d         | ENSMUSG00000056973 | 2184  | 133  | 1205  | 405  | 1975  | 180  | 1372  | 236  |
| Chchd10       | ENSMUSG00000049422 | 5597  | 303  | 4264  | 732  | 5732  | 395  | 4864  | 565  |
| Chchd2        | ENSMUSG00000070493 | 5866  | 649  | 4709  | 645  | 5829  | 370  | 5166  | 564  |
| Chrm2         | ENSMUSG00000045613 | 2913  | 381  | 2078  | 129  | 2822  | 350  | 2290  | 539  |
| Chrna2        | ENSMUSG00000022041 | 51    | 20   | 23    | 5    | 42    | 10   | 23    | 6    |
| Cirbp         | ENSMUSG00000045193 | 506   | 100  | 381   | 38   | 528   | 31   | 425   | 70   |
| Cisd1         | ENSMUSG00000037710 | 2524  | 194  | 2038  | 264  | 2499  | 82   | 2259  | 149  |
| Clcn3         | ENSMUSG00000004319 | 1219  | 147  | 945   | 108  | 1163  | 87   | 993   | 110  |
| Clpp          | ENSMUSG00000002660 | 608   | 48   | 457   | 72   | 598   | 7    | 499   | 95   |
| Clstn1        | ENSMUSG00000039953 | 1769  | 192  | 1482  | 75   | 1642  | 58   | 1584  | 93   |
| Cluh          | ENSMUSG00000020741 | 5745  | 385  | 4121  | 818  | 6093  | 799  | 5032  | 263  |
| Cmbl          | ENSMUSG00000022235 | 621   | 59   | 470   | 81   | 594   | 54   | 495   | 52   |



|           |                    |       |      |       |      |       |      |       |      |
|-----------|--------------------|-------|------|-------|------|-------|------|-------|------|
| Cobl1     | ENSMUSG00000034903 | 1935  | 295  | 1391  | 206  | 1921  | 162  | 1717  | 245  |
| Cog7      | ENSMUSG00000034951 | 461   | 24   | 365   | 35   | 450   | 38   | 403   | 33   |
| Colq      | ENSMUSG00000057606 | 238   | 48   | 142   | 30   | 274   | 25   | 195   | 33   |
| Coq10a    | ENSMUSG00000039914 | 3593  | 171  | 2600  | 450  | 3601  | 150  | 3083  | 271  |
| Coq2      | ENSMUSG00000029319 | 1358  | 71   | 1066  | 109  | 1353  | 65   | 1154  | 62   |
| Coq7      | ENSMUSG00000030652 | 1122  | 100  | 786   | 155  | 1106  | 99   | 884   | 88   |
| Coq9      | ENSMUSG00000031782 | 6190  | 445  | 4627  | 906  | 6154  | 410  | 5544  | 503  |
| Corin     | ENSMUSG00000005220 | 3746  | 79   | 2720  | 217  | 3571  | 374  | 2889  | 594  |
| Cox4i1    | ENSMUSG00000031818 | 22284 | 812  | 17754 | 1611 | 22070 | 1141 | 19696 | 1055 |
| Cox5a     | ENSMUSG00000000088 | 11595 | 608  | 8951  | 1587 | 11127 | 414  | 10060 | 740  |
| Cox5b     | ENSMUSG00000061518 | 10424 | 672  | 8385  | 1343 | 10221 | 301  | 9039  | 577  |
| Cox7a1    | ENSMUSG00000074218 | 8954  | 697  | 6119  | 1540 | 8610  | 451  | 7040  | 827  |
| Cox8b     | ENSMUSG00000025488 | 6504  | 621  | 4961  | 1023 | 6394  | 477  | 5556  | 903  |
| Cpt2      | ENSMUSG00000028607 | 3334  | 182  | 2311  | 520  | 3272  | 298  | 2688  | 241  |
| Crat      | ENSMUSG00000026853 | 8544  | 365  | 5905  | 1336 | 8462  | 672  | 6705  | 567  |
| Cs        | ENSMUSG00000005683 | 24899 | 2214 | 17482 | 3393 | 24790 | 1691 | 20831 | 1885 |
| Ctnna1    | ENSMUSG00000037815 | 10146 | 341  | 7973  | 731  | 9700  | 499  | 8679  | 771  |
| Ctsf      | ENSMUSG00000083282 | 632   | 56   | 508   | 41   | 584   | 26   | 503   | 28   |
| Cul4a     | ENSMUSG00000031446 | 2213  | 84   | 1944  | 75   | 2181  | 132  | 2162  | 67   |
| Cuta      | ENSMUSG00000024194 | 357   | 31   | 286   | 29   | 351   | 28   | 325   | 26   |
| Cux2      | ENSMUSG00000042589 | 305   | 54   | 194   | 43   | 272   | 63   | 232   | 37   |
| Cxadr     | ENSMUSG00000022865 | 914   | 145  | 688   | 47   | 929   | 123  | 924   | 91   |
| Cyb5d2    | ENSMUSG00000057778 | 378   | 41   | 287   | 32   | 380   | 40   | 322   | 22   |
| Cyfp2     | ENSMUSG00000020340 | 4903  | 247  | 3825  | 494  | 5110  | 622  | 4425  | 316  |
| Cyhr1     | ENSMUSG00000053929 | 1686  | 63   | 1426  | 122  | 1706  | 105  | 1462  | 118  |
| Cyp1a1    | ENSMUSG00000032315 | 14    | 10   | 3     | 1    | 10    | 6    | 3     | 1    |
| Cyth1     | ENSMUSG00000017132 | 1083  | 120  | 785   | 146  | 1045  | 114  | 943   | 140  |
| D17H6S53E | ENSMUSG00000043311 | 205   | 17   | 148   | 28   | 206   | 24   | 200   | 19   |
| D2hgdh    | ENSMUSG00000073609 | 648   | 30   | 491   | 28   | 640   | 53   | 550   | 62   |
| D5Erd579e | ENSMUSG00000029190 | 3086  | 284  | 2426  | 238  | 2994  | 183  | 2459  | 146  |
| Dap3      | ENSMUSG00000068921 | 1533  | 99   | 1172  | 166  | 1441  | 33   | 1291  | 61   |
| Ddt       | ENSMUSG00000001666 | 477   | 14   | 371   | 59   | 468   | 31   | 410   | 47   |
| Decr1     | ENSMUSG00000028223 | 8479  | 863  | 5924  | 1566 | 7835  | 344  | 6512  | 520  |
| Dele1     | ENSMUSG00000024442 | 2437  | 95   | 1683  | 363  | 2478  | 270  | 2004  | 115  |
| Dgat2     | ENSMUSG00000030747 | 4953  | 461  | 3276  | 860  | 4835  | 519  | 3984  | 545  |
| Dhodh     | ENSMUSG00000031730 | 247   | 18   | 159   | 24   | 232   | 20   | 214   | 23   |
| Dhrs11    | ENSMUSG00000034449 | 676   | 56   | 455   | 62   | 690   | 48   | 551   | 73   |
| Dhrs4     | ENSMUSG00000022210 | 1099  | 57   | 894   | 97   | 1070  | 35   | 930   | 39   |
| Diablo    | ENSMUSG00000029433 | 1178  | 83   | 980   | 91   | 1146  | 35   | 1105  | 48   |
| Dip2c     | ENSMUSG00000048264 | 1657  | 88   | 1255  | 180  | 1673  | 186  | 1363  | 98   |
| Dirc2     | ENSMUSG00000022848 | 917   | 63   | 720   | 74   | 897   | 73   | 778   | 36   |
| Dis3l     | ENSMUSG00000032396 | 666   | 19   | 538   | 31   | 657   | 38   | 594   | 19   |
| Dlst      | ENSMUSG00000004789 | 11654 | 750  | 8617  | 1895 | 11270 | 555  | 10153 | 788  |
| Dmpk      | ENSMUSG00000030409 | 5934  | 219  | 4888  | 565  | 5867  | 505  | 5423  | 498  |
| Dnaaf3    | ENSMUSG00000055809 | 112   | 12   | 66    | 8    | 98    | 18   | 67    | 9    |
| Dnajb2    | ENSMUSG00000026203 | 1197  | 57   | 1005  | 70   | 1211  | 30   | 1066  | 80   |
| Dnajb9    | ENSMUSG00000014905 | 945   | 82   | 775   | 43   | 973   | 79   | 828   | 109  |
| Dnajc28   | ENSMUSG00000039763 | 1292  | 140  | 949   | 125  | 1268  | 112  | 1025  | 90   |
| Doc2g     | ENSMUSG00000024871 | 2878  | 347  | 2069  | 419  | 3127  | 217  | 2451  | 320  |
| Drosha    | ENSMUSG00000022191 | 1389  | 86   | 1151  | 83   | 1380  | 106  | 1191  | 65   |
| Dsc2      | ENSMUSG00000024331 | 1098  | 132  | 758   | 132  | 1038  | 80   | 880   | 140  |
| Dusp18    | ENSMUSG00000047205 | 1193  | 123  | 695   | 186  | 1165  | 123  | 828   | 151  |
| Dusp23    | ENSMUSG00000026544 | 177   | 25   | 131   | 14   | 183   | 13   | 153   | 7    |
| Dym       | ENSMUSG00000035765 | 1390  | 74   | 1135  | 99   | 1419  | 90   | 1253  | 76   |
| Dynll2    | ENSMUSG00000020483 | 8450  | 781  | 6147  | 789  | 8457  | 316  | 7374  | 749  |
| E2f6      | ENSMUSG00000057469 | 1947  | 96   | 1553  | 144  | 1933  | 82   | 1731  | 69   |
| Ech1      | ENSMUSG00000053898 | 18987 | 2037 | 11742 | 3859 | 18009 | 1245 | 12749 | 1792 |
| Echdc3    | ENSMUSG00000039063 | 427   | 19   | 300   | 49   | 428   | 30   | 350   | 42   |
| Echs1     | ENSMUSG00000025465 | 4828  | 268  | 3779  | 465  | 4896  | 284  | 4167  | 357  |
| Eci1      | ENSMUSG00000024132 | 3819  | 262  | 2675  | 691  | 3634  | 65   | 3027  | 306  |
| Ecpas     | ENSMUSG00000050812 | 5520  | 139  | 4646  | 405  | 5619  | 641  | 4989  | 290  |
| Ecsit     | ENSMUSG00000066839 | 1352  | 92   | 1050  | 152  | 1386  | 47   | 1218  | 79   |
| Eef1a2    | ENSMUSG00000016349 | 19816 | 1103 | 16353 | 1766 | 20590 | 904  | 18385 | 1605 |
| Eef1d     | ENSMUSG00000055762 | 2212  | 97   | 1867  | 139  | 2077  | 103  | 2044  | 101  |
| Efcab2    | ENSMUSG00000026495 | 2803  | 355  | 2211  | 241  | 2798  | 209  | 2383  | 245  |
| Efnb3     | ENSMUSG00000003934 | 1231  | 119  | 643   | 238  | 1266  | 236  | 811   | 246  |
| Egflam    | ENSMUSG00000042961 | 374   | 53   | 240   | 63   | 279   | 55   | 262   | 40   |

|         |                    |       |      |       |      |       |      |       |      |
|---------|--------------------|-------|------|-------|------|-------|------|-------|------|
| Egln1   | ENSMUSG00000031987 | 9248  | 229  | 6578  | 1044 | 9122  | 656  | 7541  | 559  |
| Eid2b   | ENSMUSG00000070705 | 191   | 16   | 132   | 14   | 196   | 26   | 154   | 37   |
| Eml2    | ENSMUSG00000040811 | 379   | 40   | 285   | 35   | 408   | 44   | 337   | 30   |
| Endog   | ENSMUSG00000015337 | 455   | 64   | 312   | 72   | 475   | 50   | 367   | 54   |
| Eno3    | ENSMUSG00000060600 | 20868 | 2272 | 14909 | 3162 | 20388 | 959  | 17554 | 1469 |
| Enpp5   | ENSMUSG00000023960 | 482   | 40   | 367   | 31   | 452   | 24   | 401   | 59   |
| Entpd4b | ENSMUSG00000022066 | 1245  | 62   | 1009  | 104  | 1249  | 57   | 1115  | 37   |
| Ephx2   | ENSMUSG00000022040 | 5045  | 182  | 3683  | 568  | 4643  | 192  | 4079  | 372  |
| Epm2a   | ENSMUSG00000055493 | 816   | 72   | 609   | 39   | 825   | 73   | 714   | 58   |
| Erc1    | ENSMUSG00000030172 | 1343  | 106  | 1011  | 106  | 1205  | 149  | 1073  | 45   |
| Esrrb   | ENSMUSG00000021255 | 570   | 46   | 424   | 77   | 607   | 56   | 500   | 36   |
| Esrrg   | ENSMUSG00000026610 | 1115  | 169  | 852   | 111  | 1188  | 192  | 986   | 138  |
| Etfb    | ENSMUSG00000032314 | 11167 | 800  | 7804  | 1484 | 10775 | 533  | 8929  | 812  |
| Etfb    | ENSMUSG00000004610 | 8827  | 431  | 6069  | 1637 | 8450  | 419  | 6927  | 725  |
| Etfhd   | ENSMUSG00000027809 | 13588 | 811  | 9757  | 2314 | 12812 | 772  | 10703 | 771  |
| Extl1   | ENSMUSG00000028838 | 505   | 28   | 354   | 91   | 508   | 68   | 427   | 38   |
| Fam131a | ENSMUSG00000050821 | 452   | 30   | 325   | 65   | 445   | 59   | 370   | 46   |
| Fam20b  | ENSMUSG00000033557 | 2462  | 33   | 2046  | 249  | 2441  | 169  | 2285  | 137  |
| Fam210a | ENSMUSG00000038121 | 5630  | 318  | 3910  | 672  | 5594  | 632  | 4548  | 152  |
| Farp2   | ENSMUSG00000034066 | 407   | 27   | 323   | 41   | 400   | 28   | 340   | 23   |
| Fastkd2 | ENSMUSG00000025962 | 921   | 102  | 730   | 94   | 816   | 39   | 814   | 51   |
| Fbp2    | ENSMUSG00000021456 | 422   | 72   | 243   | 83   | 363   | 23   | 250   | 9    |
| Fbxo21  | ENSMUSG00000032898 | 802   | 70   | 590   | 81   | 829   | 129  | 684   | 55   |
| Fbxo31  | ENSMUSG00000052934 | 1386  | 125  | 967   | 187  | 1389  | 148  | 1079  | 71   |
| Fbxo32  | ENSMUSG00000022358 | 4438  | 248  | 3382  | 496  | 4609  | 317  | 3689  | 462  |
| Fdft1   | ENSMUSG00000021273 | 812   | 58   | 545   | 97   | 811   | 49   | 633   | 82   |
| Fem1a   | ENSMUSG00000043683 | 4314  | 280  | 3250  | 616  | 4473  | 492  | 3867  | 370  |
| Fhl     | ENSMUSG00000026526 | 7500  | 576  | 5659  | 1050 | 7018  | 180  | 6388  | 586  |
| Fhod3   | ENSMUSG00000034295 | 6968  | 897  | 4787  | 812  | 6949  | 852  | 5943  | 560  |
| Fign    | ENSMUSG00000075324 | 264   | 50   | 152   | 48   | 282   | 77   | 222   | 62   |
| Fkbp4   | ENSMUSG00000030357 | 7033  | 609  | 4753  | 1205 | 6950  | 342  | 5630  | 654  |
| Flad1   | ENSMUSG00000042642 | 928   | 42   | 703   | 107  | 840   | 64   | 785   | 91   |
| Fmc1    | ENSMUSG00000019689 | 622   | 55   | 458   | 87   | 580   | 55   | 484   | 71   |
| Fn3k    | ENSMUSG00000025175 | 262   | 26   | 173   | 19   | 252   | 25   | 208   | 27   |
| Fndc5   | ENSMUSG00000001334 | 7755  | 469  | 5429  | 1330 | 7876  | 453  | 6619  | 559  |
| Foxo3   | ENSMUSG00000048756 | 1906  | 138  | 1489  | 235  | 1807  | 100  | 1507  | 232  |
| Foxo4   | ENSMUSG00000042903 | 1026  | 58   | 818   | 81   | 1020  | 106  | 883   | 76   |
| Foxo6os | ENSMUSG00000084929 | 123   | 20   | 70    | 22   | 91    | 13   | 97    | 30   |
| Fsd2    | ENSMUSG00000038663 | 7461  | 469  | 5809  | 1017 | 7438  | 469  | 6588  | 359  |
| Fth1    | ENSMUSG00000024661 | 24620 | 1681 | 21525 | 749  | 25292 | 1474 | 22765 | 1350 |
| Fuz     | ENSMUSG00000011658 | 154   | 17   | 113   | 4    | 143   | 29   | 114   | 25   |
| Fxr2    | ENSMUSG00000018765 | 2087  | 79   | 1668  | 103  | 2112  | 177  | 1949  | 154  |
| Gart    | ENSMUSG00000022962 | 791   | 63   | 621   | 72   | 729   | 62   | 724   | 31   |
| Gcsh    | ENSMUSG00000034424 | 1021  | 36   | 874   | 74   | 1000  | 34   | 954   | 42   |
| Gfm1    | ENSMUSG00000027774 | 4053  | 240  | 3035  | 442  | 3973  | 430  | 3372  | 259  |
| Gfm2    | ENSMUSG00000021666 | 1266  | 144  | 1001  | 118  | 1229  | 127  | 1128  | 100  |
| Gfra1   | ENSMUSG00000025089 | 261   | 28   | 179   | 47   | 276   | 25   | 195   | 40   |
| Ghitm   | ENSMUSG00000041028 | 10888 | 1003 | 9249  | 687  | 10712 | 845  | 9689  | 126  |
| Glo1    | ENSMUSG00000024026 | 1952  | 124  | 1549  | 162  | 1830  | 76   | 1663  | 101  |
| Gm10644 | ENSMUSG00000074219 | 30    | 3    | 13    | 5    | 21    | 6    | 18    | 7    |
| Gm20619 | ENSMUSG00000093482 | 85    | 17   | 53    | 4    | 91    | 12   | 73    | 11   |
| Gm29170 | ENSMUSG00000100455 | 84    | 16   | 48    | 12   | 73    | 11   | 60    | 14   |
| Gm33543 | ENSMUSG00000110353 | 38    | 12   | 18    | 6    | 30    | 9    | 24    | 10   |
| Gm36827 | ENSMUSG00000112327 | 289   | 42   | 195   | 41   | 280   | 51   | 188   | 31   |
| Gm37829 | ENSMUSG00000104453 | 1373  | 82   | 1009  | 161  | 1372  | 115  | 1141  | 137  |
| Gm40604 | ENSMUSG00000112800 | 20    | 10   | 8     | 4    | 11    | 3    | 8     | 3    |
| Gm43672 | ENSMUSG00000106019 | 412   | 67   | 247   | 76   | 363   | 75   | 322   | 88   |
| Gm45012 | ENSMUSG00000109052 | 77    | 14   | 44    | 18   | 83    | 8    | 50    | 6    |
| Gm47547 | ENSMUSG00000114196 | 4410  | 804  | 3053  | 766  | 4397  | 589  | 3371  | 749  |
| Gm49083 | ENSMUSG00000115354 | 278   | 31   | 195   | 62   | 260   | 7    | 202   | 31   |
| Gm49130 | ENSMUSG00000115234 | 52    | 12   | 23    | 9    | 54    | 13   | 29    | 9    |
| Gm49477 | ENSMUSG00000116066 | 359   | 37   | 242   | 50   | 366   | 16   | 279   | 49   |
| Gm826   | ENSMUSG00000074623 | 78    | 4    | 53    | 10   | 73    | 9    | 60    | 9    |
| Gna12   | ENSMUSG00000000149 | 3048  | 223  | 2381  | 429  | 3083  | 284  | 2577  | 277  |
| Gnpat   | ENSMUSG00000031985 | 4943  | 161  | 3883  | 434  | 4842  | 240  | 4332  | 164  |
| Got1    | ENSMUSG00000025190 | 12937 | 538  | 8755  | 1664 | 12760 | 639  | 10615 | 1253 |
| Got2    | ENSMUSG00000031672 | 15403 | 947  | 11510 | 1822 | 15607 | 1320 | 13207 | 1045 |

|          |                    |       |      |       |      |       |      |       |      |
|----------|--------------------|-------|------|-------|------|-------|------|-------|------|
| Gpd2     | ENSMUSG00000026827 | 401   | 24   | 334   | 32   | 392   | 48   | 398   | 25   |
| Gpn1     | ENSMUSG00000064037 | 443   | 41   | 349   | 55   | 348   | 21   | 379   | 15   |
| Gpr155   | ENSMUSG00000041762 | 432   | 52   | 326   | 29   | 393   | 31   | 316   | 35   |
| Gpr22    | ENSMUSG00000044067 | 1368  | 315  | 717   | 244  | 1339  | 221  | 933   | 230  |
| Gpr27    | ENSMUSG00000072875 | 177   | 17   | 110   | 8    | 189   | 36   | 153   | 20   |
| Gpt      | ENSMUSG00000022546 | 376   | 38   | 239   | 62   | 389   | 47   | 298   | 58   |
| Grb14    | ENSMUSG00000026888 | 3020  | 238  | 2239  | 419  | 3074  | 220  | 2499  | 294  |
| Gsta4    | ENSMUSG00000032348 | 1102  | 100  | 835   | 91   | 1063  | 51   | 979   | 106  |
| Gstk1    | ENSMUSG00000029864 | 1045  | 99   | 635   | 177  | 1034  | 85   | 737   | 172  |
| Gstm1    | ENSMUSG00000058135 | 2900  | 228  | 2007  | 410  | 2765  | 233  | 2247  | 280  |
| Gstm7    | ENSMUSG00000004035 | 451   | 36   | 268   | 66   | 397   | 64   | 313   | 83   |
| Gstp1    | ENSMUSG00000060803 | 1530  | 60   | 1249  | 118  | 1564  | 76   | 1343  | 113  |
| Gstt1    | ENSMUSG00000001663 | 186   | 22   | 128   | 20   | 182   | 23   | 129   | 13   |
| Gypc     | ENSMUSG00000090523 | 589   | 35   | 453   | 36   | 560   | 48   | 489   | 47   |
| Gys1     | ENSMUSG00000003865 | 2308  | 136  | 1765  | 214  | 2462  | 310  | 2076  | 150  |
| Gzmm     | ENSMUSG00000054206 | 67    | 4    | 40    | 12   | 60    | 12   | 51    | 9    |
| H2-Ke6   | ENSMUSG00000073422 | 624   | 79   | 486   | 54   | 621   | 40   | 499   | 38   |
| H2afv    | ENSMUSG00000041126 | 582   | 47   | 479   | 48   | 560   | 29   | 511   | 53   |
| Hadh     | ENSMUSG00000027984 | 9800  | 579  | 6798  | 1554 | 9433  | 502  | 7758  | 928  |
| Hadhb    | ENSMUSG00000059447 | 37787 | 3939 | 27391 | 5861 | 37795 | 3637 | 30089 | 2124 |
| Hbs1l    | ENSMUSG00000019977 | 1596  | 64   | 1363  | 99   | 1582  | 55   | 1431  | 99   |
| Hcn4     | ENSMUSG00000032338 | 215   | 29   | 145   | 22   | 226   | 22   | 167   | 29   |
| Hdhd2    | ENSMUSG00000025421 | 925   | 39   | 718   | 100  | 905   | 51   | 782   | 86   |
| Heatr5b  | ENSMUSG00000039414 | 1026  | 107  | 806   | 74   | 965   | 134  | 837   | 66   |
| Helt     | ENSMUSG00000047171 | 27    | 9    | 8     | 2    | 21    | 5    | 16    | 10   |
| Herc3    | ENSMUSG00000029804 | 1105  | 188  | 784   | 144  | 1110  | 191  | 995   | 112  |
| Hibadh   | ENSMUSG00000029776 | 4598  | 354  | 3506  | 554  | 4704  | 186  | 4030  | 384  |
| Hikeshi  | ENSMUSG00000062797 | 431   | 18   | 351   | 14   | 437   | 49   | 395   | 29   |
| Hk2      | ENSMUSG00000000628 | 7061  | 664  | 5062  | 953  | 7161  | 711  | 6174  | 483  |
| Hlf      | ENSMUSG00000003949 | 702   | 180  | 377   | 124  | 587   | 150  | 396   | 181  |
| Hmgcs2   | ENSMUSG00000027875 | 274   | 33   | 184   | 30   | 225   | 17   | 152   | 50   |
| Hnmt     | ENSMUSG00000026986 | 222   | 26   | 145   | 18   | 233   | 31   | 181   | 38   |
| Hopx     | ENSMUSG00000059325 | 3360  | 233  | 2164  | 627  | 3438  | 319  | 2591  | 663  |
| Hrc      | ENSMUSG00000038239 | 19722 | 920  | 12511 | 2864 | 19104 | 720  | 15198 | 1393 |
| Hsd17b10 | ENSMUSG00000025260 | 1979  | 163  | 1487  | 242  | 1984  | 101  | 1624  | 232  |
| Hsd12    | ENSMUSG00000028383 | 5524  | 757  | 4049  | 946  | 5605  | 677  | 4510  | 583  |
| Hspa5    | ENSMUSG00000026864 | 12991 | 1134 | 9421  | 1954 | 11342 | 633  | 10018 | 1044 |
| Hspa9    | ENSMUSG00000024359 | 16027 | 1269 | 12152 | 2141 | 15522 | 684  | 14164 | 919  |
| Hspd1    | ENSMUSG00000025980 | 8960  | 680  | 6784  | 1395 | 8344  | 426  | 7562  | 640  |
| Htra1    | ENSMUSG00000006205 | 1381  | 97   | 1023  | 118  | 1387  | 133  | 1174  | 135  |
| Iars2    | ENSMUSG00000026618 | 2409  | 99   | 1873  | 136  | 2398  | 100  | 2171  | 120  |
| Idh2     | ENSMUSG00000030541 | 25832 | 1566 | 18548 | 3665 | 26906 | 2049 | 21457 | 2197 |
| Idh3a    | ENSMUSG00000032279 | 10211 | 1028 | 7707  | 867  | 10029 | 629  | 8753  | 799  |
| Idh3b    | ENSMUSG00000027406 | 11455 | 1144 | 8621  | 1973 | 11227 | 459  | 9312  | 738  |
| Ids      | ENSMUSG00000035847 | 844   | 113  | 686   | 22   | 705   | 81   | 678   | 78   |
| Idua     | ENSMUSG00000033540 | 381   | 15   | 288   | 34   | 343   | 21   | 312   | 19   |
| Il10rb   | ENSMUSG00000022969 | 2740  | 90   | 2327  | 186  | 2766  | 76   | 2592  | 101  |
| Immt     | ENSMUSG00000052337 | 11137 | 723  | 8672  | 1433 | 10924 | 555  | 9873  | 547  |
| Imp3     | ENSMUSG00000032288 | 386   | 37   | 293   | 37   | 353   | 24   | 333   | 39   |
| Insyn1   | ENSMUSG00000066607 | 332   | 30   | 244   | 41   | 353   | 22   | 296   | 17   |
| Isca1    | ENSMUSG00000044792 | 5523  | 385  | 4556  | 545  | 5614  | 212  | 5191  | 315  |
| Iscu     | ENSMUSG00000025825 | 1538  | 101  | 1296  | 84   | 1533  | 74   | 1368  | 132  |
| Isoc2a   | ENSMUSG00000086784 | 619   | 51   | 458   | 90   | 619   | 73   | 511   | 50   |
| Kars     | ENSMUSG00000031948 | 2130  | 77   | 1818  | 133  | 2087  | 64   | 1922  | 99   |
| Kcnb1    | ENSMUSG00000050556 | 1529  | 86   | 1149  | 198  | 1362  | 171  | 1226  | 75   |
| Kcnd3    | ENSMUSG00000040896 | 419   | 52   | 304   | 54   | 437   | 49   | 338   | 38   |
| Kcng2    | ENSMUSG00000059852 | 1131  | 114  | 738   | 153  | 1222  | 266  | 957   | 140  |
| Kcnip2   | ENSMUSG00000025221 | 2873  | 266  | 2038  | 321  | 2700  | 318  | 2226  | 310  |
| Kcnk3    | ENSMUSG00000049265 | 4069  | 294  | 2872  | 660  | 4507  | 692  | 3530  | 463  |
| Kctd9    | ENSMUSG00000034327 | 1736  | 135  | 1293  | 231  | 1770  | 104  | 1588  | 97   |
| Khdrbs3  | ENSMUSG00000022332 | 876   | 67   | 638   | 92   | 898   | 73   | 738   | 119  |
| Kif16b   | ENSMUSG00000038844 | 1579  | 142  | 1284  | 141  | 1624  | 143  | 1458  | 52   |
| Kif1c    | ENSMUSG00000020821 | 13040 | 401  | 10864 | 1290 | 13509 | 1540 | 11810 | 481  |
| Kif21a   | ENSMUSG00000022629 | 911   | 67   | 703   | 90   | 899   | 40   | 823   | 111  |
| Klf9     | ENSMUSG00000033863 | 2073  | 327  | 1580  | 218  | 1929  | 244  | 1672  | 332  |
| Klhl21   | ENSMUSG00000073700 | 1596  | 96   | 1232  | 219  | 1629  | 106  | 1373  | 96   |
| Klhl33   | ENSMUSG00000090799 | 489   | 94   | 262   | 86   | 446   | 37   | 313   | 87   |

|          |                    |       |      |       |      |       |      |       |      |
|----------|--------------------|-------|------|-------|------|-------|------|-------|------|
| Kpna6    | ENSMUSG0000003731  | 2025  | 137  | 1642  | 186  | 1978  | 88   | 1813  | 64   |
| Ky       | ENSMUSG00000035606 | 445   | 33   | 251   | 85   | 458   | 49   | 367   | 57   |
| Kyat1    | ENSMUSG00000039648 | 379   | 27   | 294   | 42   | 380   | 16   | 314   | 20   |
| L2hgdh   | ENSMUSG00000020988 | 1075  | 56   | 746   | 101  | 1069  | 51   | 876   | 104  |
| Lclat1   | ENSMUSG00000054469 | 3111  | 302  | 2399  | 376  | 3091  | 319  | 2588  | 234  |
| Ldhh     | ENSMUSG00000030246 | 22959 | 1639 | 15955 | 3136 | 22470 | 933  | 18647 | 1684 |
| Letm1    | ENSMUSG00000005299 | 2120  | 191  | 1513  | 340  | 2063  | 206  | 1803  | 214  |
| Lias     | ENSMUSG00000029199 | 931   | 93   | 751   | 90   | 903   | 34   | 834   | 53   |
| Limch1   | ENSMUSG00000037736 | 5052  | 422  | 3923  | 326  | 5049  | 205  | 4581  | 477  |
| Lingo3   | ENSMUSG00000051067 | 229   | 41   | 120   | 47   | 252   | 73   | 159   | 48   |
| Lmbrd1   | ENSMUSG00000073725 | 1143  | 53   | 960   | 76   | 1105  | 87   | 1035  | 39   |
| Lmo7     | ENSMUSG00000033060 | 8272  | 652  | 6224  | 773  | 7881  | 612  | 7367  | 993  |
| Lonp1    | ENSMUSG00000041168 | 2317  | 80   | 2025  | 163  | 2376  | 150  | 2252  | 87   |
| Lonrf2   | ENSMUSG00000048814 | 202   | 35   | 126   | 24   | 204   | 39   | 153   | 25   |
| Lpin1    | ENSMUSG00000020593 | 4444  | 676  | 2968  | 594  | 4769  | 532  | 3724  | 386  |
| Lpl      | ENSMUSG00000015568 | 90429 | 5374 | 71420 | 8174 | 93258 | 8317 | 80525 | 6094 |
| Lrpprc   | ENSMUSG00000024120 | 4237  | 451  | 2986  | 400  | 4181  | 326  | 3537  | 377  |
| Lrrc3b   | ENSMUSG00000045201 | 506   | 44   | 333   | 72   | 477   | 50   | 367   | 53   |
| Lsm14b   | ENSMUSG00000039108 | 972   | 35   | 742   | 85   | 914   | 50   | 896   | 76   |
| Lynx1    | ENSMUSG00000022594 | 5026  | 322  | 3722  | 716  | 5034  | 369  | 4308  | 264  |
| Maf1     | ENSMUSG00000022553 | 1093  | 59   | 891   | 57   | 1121  | 107  | 1002  | 47   |
| Magi3    | ENSMUSG00000052539 | 1616  | 181  | 1196  | 121  | 1556  | 176  | 1327  | 166  |
| Magt1    | ENSMUSG00000031232 | 1232  | 137  | 942   | 126  | 1216  | 90   | 994   | 120  |
| Malsu1   | ENSMUSG00000029815 | 281   | 28   | 208   | 15   | 260   | 23   | 236   | 30   |
| Map10    | ENSMUSG00000050930 | 149   | 21   | 98    | 15   | 151   | 17   | 112   | 10   |
| Map1lc3a | ENSMUSG00000027602 | 4603  | 222  | 3864  | 305  | 4713  | 378  | 4049  | 447  |
| Mapk8ip3 | ENSMUSG00000024163 | 1609  | 148  | 1286  | 127  | 1571  | 128  | 1366  | 102  |
| Mars2    | ENSMUSG00000046994 | 370   | 47   | 284   | 34   | 364   | 34   | 304   | 25   |
| Mccc1    | ENSMUSG00000027709 | 2112  | 94   | 1589  | 261  | 2026  | 95   | 1662  | 118  |
| Mdgal    | ENSMUSG00000043557 | 283   | 40   | 180   | 25   | 255   | 46   | 211   | 43   |
| Mdh2     | ENSMUSG00000019179 | 16876 | 703  | 12970 | 2129 | 16369 | 1034 | 14499 | 734  |
| Me1      | ENSMUSG00000032418 | 2846  | 130  | 2349  | 226  | 2697  | 138  | 2438  | 237  |
| Med12l   | ENSMUSG00000056476 | 211   | 24   | 139   | 35   | 199   | 27   | 142   | 38   |
| Med9     | ENSMUSG00000061650 | 383   | 8    | 302   | 30   | 383   | 23   | 347   | 23   |
| Mettl7a1 | ENSMUSG00000054619 | 740   | 30   | 561   | 48   | 684   | 59   | 597   | 63   |
| Mfn1     | ENSMUSG00000027668 | 8217  | 628  | 6382  | 1129 | 8242  | 170  | 7059  | 753  |
| Mfn2     | ENSMUSG00000029020 | 15414 | 955  | 11184 | 2042 | 15810 | 1644 | 13241 | 705  |
| Mgme1    | ENSMUSG00000027424 | 350   | 28   | 255   | 46   | 337   | 12   | 267   | 30   |
| Mgrn1    | ENSMUSG00000022517 | 3397  | 191  | 2489  | 420  | 3480  | 322  | 2787  | 167  |
| Mhrt     | ENSMUSG00000097652 | 413   | 27   | 294   | 60   | 414   | 38   | 328   | 38   |
| Migal    | ENSMUSG00000054942 | 412   | 61   | 323   | 8    | 409   | 40   | 383   | 35   |
| Mipep    | ENSMUSG00000021993 | 1364  | 63   | 983   | 167  | 1394  | 126  | 1103  | 71   |
| Milt6    | ENSMUSG00000038437 | 1839  | 74   | 1515  | 116  | 1801  | 105  | 1533  | 96   |
| Mlxip    | ENSMUSG00000038342 | 1090  | 98   | 876   | 108  | 1082  | 85   | 963   | 38   |
| Mmaa     | ENSMUSG00000037022 | 603   | 23   | 460   | 70   | 572   | 47   | 517   | 37   |
| Mmadhc   | ENSMUSG00000026766 | 1760  | 184  | 1400  | 199  | 1684  | 61   | 1526  | 84   |
| Mov10l1  | ENSMUSG00000015365 | 912   | 70   | 518   | 82   | 908   | 73   | 735   | 108  |
| Mpi      | ENSMUSG00000032306 | 1513  | 105  | 1202  | 137  | 1517  | 24   | 1387  | 104  |
| Mpped2   | ENSMUSG00000016386 | 351   | 88   | 229   | 30   | 340   | 24   | 247   | 36   |
| Mpst     | ENSMUSG00000071711 | 347   | 22   | 269   | 21   | 344   | 35   | 280   | 23   |
| Mpv17    | ENSMUSG00000107283 | 1098  | 32   | 873   | 90   | 1118  | 80   | 934   | 104  |
| Mrpl14   | ENSMUSG00000023939 | 682   | 54   | 516   | 77   | 739   | 35   | 586   | 87   |
| Mrpl16   | ENSMUSG00000024683 | 961   | 36   | 784   | 75   | 930   | 52   | 848   | 97   |
| Mrpl28   | ENSMUSG00000024181 | 1210  | 39   | 882   | 132  | 1171  | 81   | 1020  | 121  |
| Mrpl37   | ENSMUSG00000028622 | 1184  | 43   | 904   | 135  | 1161  | 34   | 1046  | 74   |
| Mrpl38   | ENSMUSG00000020775 | 704   | 31   | 534   | 72   | 674   | 41   | 611   | 58   |
| Mrpl39   | ENSMUSG00000022889 | 1365  | 91   | 1053  | 180  | 1335  | 40   | 1087  | 56   |
| Mrpl4    | ENSMUSG00000003299 | 1028  | 38   | 792   | 138  | 1029  | 93   | 915   | 137  |
| Mrpl45   | ENSMUSG00000018882 | 1187  | 97   | 837   | 153  | 1100  | 58   | 1043  | 54   |
| Mrps26   | ENSMUSG00000037740 | 355   | 39   | 258   | 24   | 351   | 18   | 326   | 26   |
| Mrps35   | ENSMUSG00000040112 | 1312  | 76   | 991   | 219  | 1236  | 59   | 1132  | 63   |
| Mrps6    | ENSMUSG00000039680 | 361   | 20   | 285   | 16   | 354   | 19   | 300   | 4    |
| Msrb2    | ENSMUSG00000023094 | 1067  | 66   | 775   | 115  | 1023  | 25   | 865   | 63   |
| Mtftp1   | ENSMUSG00000004748 | 1636  | 82   | 1103  | 322  | 1626  | 114  | 1320  | 90   |
| Mtfr1l   | ENSMUSG00000046671 | 2563  | 65   | 2169  | 189  | 2622  | 122  | 2390  | 105  |
| Mtg2     | ENSMUSG00000039069 | 366   | 31   | 275   | 26   | 387   | 9    | 312   | 16   |
| Mtmr4    | ENSMUSG00000018401 | 533   | 95   | 415   | 52   | 508   | 47   | 429   | 38   |

|         |                    |        |       |        |       |        |       |        |       |
|---------|--------------------|--------|-------|--------|-------|--------|-------|--------|-------|
| Mto1    | ENSMUSG00000032342 | 481    | 27    | 368    | 46    | 450    | 40    | 405    | 41    |
| Mtr     | ENSMUSG00000021311 | 3225   | 471   | 2012   | 528   | 2736   | 435   | 2132   | 259   |
| Mtus2   | ENSMUSG00000029651 | 2962   | 248   | 2267   | 102   | 3029   | 325   | 2381   | 425   |
| Myadml2 | ENSMUSG00000025141 | 267    | 6     | 178    | 37    | 256    | 34    | 227    | 25    |
| Mybbpla | ENSMUSG00000040463 | 1302   | 174   | 1041   | 48    | 1189   | 167   | 1099   | 79    |
| Myh14   | ENSMUSG00000030739 | 1825   | 190   | 1436   | 214   | 1992   | 381   | 1613   | 123   |
| Myh6    | ENSMUSG00000040752 | 416670 | 31586 | 295124 | 67491 | 432469 | 60382 | 365274 | 31724 |
| Mylip   | ENSMUSG00000038175 | 408    | 59    | 322    | 55    | 361    | 21    | 336    | 42    |
| Myzap   | ENSMUSG00000041361 | 8078   | 741   | 6069   | 777   | 8163   | 545   | 7067   | 721   |
| Nampt   | ENSMUSG00000020572 | 4880   | 529   | 3965   | 206   | 4631   | 388   | 3944   | 359   |
| Nbas    | ENSMUSG00000020576 | 829    | 71    | 596    | 58    | 720    | 104   | 703    | 64    |
| Ndrg2   | ENSMUSG00000004558 | 19416  | 536   | 16383  | 1310  | 19419  | 1235  | 17364  | 725   |
| Ndufa10 | ENSMUSG00000026260 | 9566   | 706   | 7436   | 1132  | 9920   | 331   | 8450   | 886   |
| Ndufa8  | ENSMUSG00000026895 | 4878   | 294   | 3771   | 635   | 4757   | 148   | 4279   | 331   |
| Ndufa9  | ENSMUSG00000000399 | 9480   | 996   | 7084   | 1337  | 9287   | 369   | 7867   | 703   |
| Ndufs1  | ENSMUSG00000025968 | 15975  | 1815  | 11734  | 2163  | 15650  | 1579  | 13236  | 1027  |
| Ndufs2  | ENSMUSG00000013593 | 16031  | 729   | 11634  | 1773  | 15858  | 991   | 13476  | 1336  |
| Ndufs3  | ENSMUSG00000005510 | 6047   | 349   | 4620   | 872   | 5917   | 121   | 5197   | 447   |
| Ndufs7  | ENSMUSG00000020153 | 3525   | 187   | 2485   | 513   | 3595   | 317   | 2923   | 370   |
| Ndufv1  | ENSMUSG00000037916 | 9773   | 762   | 6974   | 1216  | 9669   | 615   | 8148   | 626   |
| Nectin2 | ENSMUSG00000062300 | 413    | 36    | 310    | 34    | 417    | 41    | 335    | 50    |
| Nek9    | ENSMUSG00000034290 | 4497   | 135   | 3774   | 292   | 4482   | 346   | 4215   | 107   |
| Nfe2l1  | ENSMUSG00000038615 | 10454  | 393   | 8704   | 788   | 10418  | 916   | 9618   | 241   |
| Nfs1    | ENSMUSG00000027618 | 1552   | 137   | 1235   | 133   | 1562   | 117   | 1353   | 125   |
| Ngrn    | ENSMUSG00000047084 | 316    | 43    | 243    | 18    | 297    | 10    | 268    | 29    |
| Nmnat3  | ENSMUSG00000032456 | 318    | 32    | 227    | 37    | 294    | 26    | 237    | 22    |
| Nomo1   | ENSMUSG00000030835 | 2843   | 188   | 2392   | 196   | 2879   | 272   | 2584   | 198   |
| Npepps  | ENSMUSG00000001441 | 2325   | 152   | 1944   | 99    | 2270   | 128   | 2110   | 152   |
| Npri2   | ENSMUSG00000010057 | 233    | 23    | 177    | 25    | 218    | 16    | 188    | 17    |
| Nqo2    | ENSMUSG00000046949 | 946    | 76    | 768    | 84    | 944    | 37    | 822    | 27    |
| Nr1d1   | ENSMUSG00000020889 | 2205   | 482   | 1594   | 392   | 2278   | 416   | 1686   | 114   |
| Nr3c2   | ENSMUSG00000031618 | 554    | 97    | 352    | 33    | 533    | 70    | 406    | 87    |
| Nsmce1  | ENSMUSG00000030750 | 572    | 26    | 425    | 55    | 506    | 32    | 480    | 49    |
| Nsun4   | ENSMUSG00000028706 | 668    | 48    | 514    | 69    | 656    | 35    | 592    | 35    |
| Nt5c1a  | ENSMUSG00000054958 | 221    | 21    | 132    | 21    | 214    | 28    | 180    | 22    |
| Nt5dc3  | ENSMUSG00000054027 | 1591   | 190   | 1169   | 296   | 1701   | 183   | 1426   | 165   |
| Ntn1    | ENSMUSG00000020902 | 1895   | 146   | 1435   | 153   | 2064   | 197   | 1793   | 251   |
| Nudc    | ENSMUSG00000028851 | 1219   | 28    | 997    | 119   | 1222   | 68    | 1116   | 61    |
| Nudt3   | ENSMUSG00000024213 | 2420   | 197   | 1955   | 179   | 2428   | 117   | 2144   | 103   |
| Nudt6   | ENSMUSG00000050174 | 240    | 31    | 183    | 19    | 270    | 13    | 214    | 24    |
| Oat     | ENSMUSG00000030934 | 4023   | 214   | 3428   | 322   | 3893   | 236   | 3570   | 97    |
| Ogdh    | ENSMUSG00000020456 | 39640  | 2492  | 29734  | 4328  | 41635  | 5116  | 35518  | 902   |
| Oma1    | ENSMUSG00000035069 | 520    | 27    | 382    | 67    | 517    | 40    | 433    | 46    |
| Opa1    | ENSMUSG00000038084 | 5644   | 514   | 4210   | 706   | 5735   | 550   | 5001   | 562   |
| Oplah   | ENSMUSG00000022562 | 803    | 117   | 550    | 66    | 755    | 147   | 645    | 45    |
| Optn    | ENSMUSG00000026672 | 2167   | 261   | 1708   | 294   | 2308   | 86    | 2033   | 94    |
| Osbp    | ENSMUSG00000024687 | 2871   | 112   | 2475   | 227   | 3049   | 216   | 2682   | 119   |
| Osbp12  | ENSMUSG00000039050 | 924    | 46    | 750    | 55    | 906    | 59    | 792    | 22    |
| Osbp16  | ENSMUSG00000042359 | 560    | 64    | 401    | 56    | 579    | 105   | 481    | 24    |
| Osgep   | ENSMUSG00000006289 | 680    | 53    | 499    | 68    | 589    | 47    | 573    | 41    |
| Otud4   | ENSMUSG00000036990 | 1969   | 261   | 1551   | 87    | 1916   | 144   | 1630   | 131   |
| Oxa1l   | ENSMUSG00000000959 | 1341   | 57    | 1036   | 150   | 1356   | 195   | 1142   | 95    |
| Oxct1   | ENSMUSG00000022186 | 26538  | 1570  | 20521  | 2412  | 25456  | 2358  | 23051  | 1272  |
| Oxnad1  | ENSMUSG00000021906 | 1147   | 104   | 870    | 148   | 1159   | 96    | 1055   | 90    |
| Pacsin2 | ENSMUSG00000016664 | 4608   | 491   | 3453   | 568   | 4770   | 416   | 3975   | 269   |
| Pccb    | ENSMUSG00000032527 | 1749   | 37    | 1306   | 178   | 1783   | 212   | 1458   | 93    |
| Pcp4l1  | ENSMUSG00000038370 | 3448   | 91    | 2643   | 293   | 3460   | 188   | 3005   | 313   |
| Pde2a   | ENSMUSG00000110195 | 1585   | 126   | 1282   | 143   | 1439   | 108   | 1257   | 211   |
| Pdf     | ENSMUSG00000078931 | 565    | 42    | 418    | 72    | 575    | 29    | 492    | 19    |
| Pdk2    | ENSMUSG00000038967 | 7045   | 426   | 4922   | 991   | 7351   | 661   | 5815   | 537   |
| Pdss2   | ENSMUSG00000038240 | 428    | 19    | 288    | 48    | 415    | 44    | 365    | 47    |
| Pdzd2   | ENSMUSG00000022197 | 1958   | 240   | 1387   | 312   | 1714   | 300   | 1447   | 149   |
| Peg13   | ENSMUSG00000106847 | 1266   | 135   | 996    | 129   | 1259   | 67    | 1062   | 102   |
| Perm1   | ENSMUSG00000078486 | 6061   | 537   | 4239   | 948   | 6388   | 499   | 5164   | 309   |
| Pex10   | ENSMUSG00000029047 | 216    | 17    | 157    | 21    | 236    | 16    | 189    | 19    |
| Pex6    | ENSMUSG00000002763 | 536    | 39    | 383    | 52    | 543    | 100   | 441    | 44    |
| Pfkl    | ENSMUSG00000020277 | 1893   | 156   | 1558   | 139   | 1871   | 165   | 1710   | 80    |

|          |                    |       |      |       |      |       |      |       |      |
|----------|--------------------|-------|------|-------|------|-------|------|-------|------|
| Pfkm     | ENSMUSG00000033065 | 18225 | 1341 | 12907 | 1890 | 18352 | 1337 | 14993 | 396  |
| Pgm5     | ENSMUSG00000041731 | 2496  | 117  | 1972  | 181  | 2577  | 106  | 2310  | 218  |
| Phf20    | ENSMUSG00000038116 | 645   | 141  | 463   | 64   | 547   | 79   | 484   | 111  |
| Phkg1    | ENSMUSG00000025537 | 414   | 78   | 217   | 95   | 351   | 52   | 195   | 50   |
| Phpt1    | ENSMUSG00000036504 | 592   | 39   | 477   | 58   | 591   | 19   | 515   | 20   |
| Phyh     | ENSMUSG00000026664 | 9819  | 550  | 7600  | 1012 | 9908  | 282  | 8331  | 547  |
| Pigg     | ENSMUSG00000029263 | 357   | 15   | 277   | 13   | 360   | 32   | 317   | 44   |
| Pigv     | ENSMUSG00000043257 | 190   | 34   | 113   | 16   | 185   | 35   | 150   | 33   |
| Pik3r4   | ENSMUSG00000032571 | 510   | 63   | 421   | 32   | 453   | 52   | 451   | 38   |
| Pim3     | ENSMUSG00000035828 | 1043  | 153  | 638   | 156  | 989   | 141  | 713   | 162  |
| Pip4k2c  | ENSMUSG00000025417 | 839   | 38   | 718   | 27   | 859   | 49   | 781   | 35   |
| Pitpnc1  | ENSMUSG00000040430 | 2019  | 131  | 1451  | 306  | 1945  | 148  | 1677  | 225  |
| Pitrm1   | ENSMUSG00000021193 | 1183  | 91   | 917   | 87   | 1076  | 97   | 982   | 47   |
| Plin4    | ENSMUSG00000002831 | 3263  | 103  | 2596  | 321  | 3280  | 102  | 2808  | 366  |
| Plpbb    | ENSMUSG00000031485 | 1297  | 158  | 1038  | 125  | 1269  | 103  | 1218  | 88   |
| Pmpca    | ENSMUSG00000026926 | 2809  | 172  | 2292  | 228  | 2800  | 157  | 2538  | 100  |
| Pnpla2   | ENSMUSG00000025509 | 4617  | 330  | 3361  | 654  | 4556  | 476  | 3773  | 317  |
| Poldip2  | ENSMUSG00000001100 | 2037  | 140  | 1588  | 200  | 2103  | 131  | 1870  | 118  |
| Polr2b   | ENSMUSG00000029250 | 1491  | 97   | 1240  | 88   | 1445  | 75   | 1325  | 88   |
| Polr2e   | ENSMUSG00000004667 | 833   | 69   | 697   | 28   | 814   | 44   | 761   | 49   |
| Polr2m   | ENSMUSG00000032199 | 4202  | 139  | 3527  | 289  | 4270  | 294  | 3840  | 106  |
| Ppara    | ENSMUSG00000022383 | 730   | 69   | 463   | 119  | 639   | 77   | 525   | 69   |
| Ppm1k    | ENSMUSG00000037826 | 2243  | 337  | 1519  | 318  | 2006  | 174  | 1607  | 419  |
| Ppp1r12b | ENSMUSG00000073557 | 7349  | 246  | 5778  | 1053 | 8073  | 1048 | 6703  | 244  |
| Ppp1r26  | ENSMUSG00000035829 | 123   | 33   | 63    | 14   | 99    | 6    | 69    | 7    |
| Ppp1r3d  | ENSMUSG00000049999 | 323   | 31   | 243   | 23   | 344   | 39   | 274   | 29   |
| Ppp5c    | ENSMUSG0000003099  | 1134  | 58   | 913   | 91   | 1135  | 59   | 1032  | 79   |
| Ppt2     | ENSMUSG00000015474 | 570   | 20   | 441   | 69   | 579   | 54   | 505   | 43   |
| Prdx6    | ENSMUSG00000026701 | 3412  | 145  | 2618  | 272  | 3250  | 102  | 2855  | 190  |
| Prkaca   | ENSMUSG00000005469 | 4064  | 153  | 3118  | 405  | 4060  | 252  | 3598  | 192  |
| Prkag1   | ENSMUSG00000067713 | 1480  | 97   | 1136  | 121  | 1449  | 53   | 1228  | 110  |
| Prkce    | ENSMUSG00000045038 | 1038  | 123  | 798   | 114  | 1083  | 139  | 932   | 92   |
| Prpf19   | ENSMUSG00000024735 | 3570  | 220  | 2865  | 389  | 3749  | 422  | 3240  | 103  |
| Prpf8    | ENSMUSG00000020850 | 3805  | 235  | 3158  | 312  | 3806  | 301  | 3465  | 198  |
| Psap     | ENSMUSG00000004207 | 20301 | 713  | 16734 | 1671 | 20510 | 1354 | 18075 | 1122 |
| Psm2     | ENSMUSG00000006998 | 4504  | 254  | 3688  | 415  | 4294  | 293  | 4129  | 211  |
| Ptcd3    | ENSMUSG00000063884 | 3497  | 444  | 2527  | 522  | 3299  | 255  | 2951  | 253  |
| Ptov1    | ENSMUSG00000038502 | 994   | 34   | 794   | 32   | 947   | 73   | 875   | 61   |
| Ptpn3    | ENSMUSG00000038764 | 1516  | 118  | 1158  | 191  | 1433  | 94   | 1204  | 64   |
| Pttg1    | ENSMUSG00000020415 | 1218  | 104  | 917   | 152  | 1220  | 46   | 1000  | 82   |
| Pxmp2    | ENSMUSG00000029499 | 803   | 44   | 554   | 114  | 790   | 47   | 628   | 75   |
| Pygm     | ENSMUSG00000032648 | 19355 | 1268 | 13869 | 2475 | 19815 | 1520 | 16110 | 975  |
| Qdpr     | ENSMUSG00000015806 | 905   | 53   | 716   | 59   | 901   | 38   | 833   | 92   |
| Qsox2    | ENSMUSG00000036327 | 354   | 29   | 255   | 33   | 340   | 26   | 293   | 34   |
| R3hdm4   | ENSMUSG00000035781 | 843   | 29   | 689   | 82   | 840   | 52   | 717   | 45   |
| Rab12    | ENSMUSG00000023460 | 2932  | 232  | 2405  | 100  | 2976  | 158  | 2577  | 278  |
| Rab28    | ENSMUSG00000029128 | 1501  | 127  | 1261  | 120  | 1546  | 89   | 1421  | 64   |
| Rab3a    | ENSMUSG00000031840 | 556   | 31   | 385   | 62   | 576   | 29   | 459   | 63   |
| Rai2     | ENSMUSG00000043518 | 607   | 58   | 481   | 89   | 647   | 60   | 562   | 52   |
| Ralgapa2 | ENSMUSG00000037110 | 2617  | 245  | 1978  | 383  | 2581  | 274  | 2195  | 200  |
| Ralgapb  | ENSMUSG00000027652 | 1478  | 136  | 1208  | 120  | 1466  | 153  | 1287  | 73   |
| Rapsn    | ENSMUSG00000002104 | 164   | 14   | 112   | 16   | 166   | 20   | 118   | 21   |
| Rasd2    | ENSMUSG00000034472 | 85    | 16   | 52    | 8    | 87    | 5    | 67    | 16   |
| Rbbp5    | ENSMUSG00000026439 | 503   | 77   | 394   | 43   | 462   | 27   | 433   | 19   |
| Rbfa     | ENSMUSG00000024570 | 537   | 27   | 421   | 57   | 552   | 37   | 476   | 23   |
| Rbm20    | ENSMUSG00000043639 | 4345  | 353  | 3333  | 538  | 4405  | 474  | 3671  | 314  |
| Rbm24    | ENSMUSG00000038132 | 2769  | 152  | 2054  | 213  | 2701  | 211  | 2285  | 323  |
| Rbpms    | ENSMUSG00000031586 | 2091  | 178  | 1725  | 171  | 2143  | 145  | 1933  | 119  |
| Rdm1     | ENSMUSG00000010362 | 355   | 44   | 260   | 27   | 395   | 55   | 308   | 50   |
| Retnla   | ENSMUSG00000061100 | 77    | 26   | 28    | 12   | 70    | 10   | 47    | 28   |
| Retsat   | ENSMUSG00000056666 | 937   | 102  | 713   | 90   | 893   | 134  | 765   | 34   |
| Rgs7     | ENSMUSG00000026527 | 36    | 12   | 15    | 6    | 19    | 3    | 25    | 6    |
| Rhobtb2  | ENSMUSG00000022075 | 496   | 77   | 385   | 66   | 531   | 42   | 452   | 21   |
| Rhot2    | ENSMUSG00000025733 | 3078  | 130  | 2175  | 480  | 3032  | 157  | 2480  | 193  |
| Rmnd1    | ENSMUSG00000019763 | 878   | 53   | 704   | 63   | 926   | 55   | 800   | 97   |
| Rnf114   | ENSMUSG00000006418 | 1224  | 48   | 1047  | 46   | 1232  | 102  | 1117  | 38   |
| Rpal     | ENSMUSG00000000751 | 1034  | 51   | 817   | 60   | 1036  | 89   | 910   | 49   |

|            |                     |       |      |       |      |       |      |       |      |
|------------|---------------------|-------|------|-------|------|-------|------|-------|------|
| Rpap1      | ENSMUSG00000034032  | 295   | 38   | 221   | 36   | 319   | 44   | 271   | 27   |
| Rpusd4     | ENSMUSG00000032044  | 283   | 14   | 221   | 31   | 291   | 18   | 238   | 21   |
| Rragd      | ENSMUSG00000028278  | 3170  | 310  | 2413  | 232  | 3220  | 162  | 2839  | 371  |
| Rrn3       | ENSMUSG00000022682  | 1172  | 63   | 954   | 93   | 1149  | 64   | 1040  | 78   |
| Rtn4ipl    | ENSMUSG00000019864  | 1524  | 104  | 1118  | 239  | 1538  | 112  | 1315  | 140  |
| Rufy1      | ENSMUSG00000020375  | 709   | 60   | 558   | 43   | 649   | 12   | 610   | 48   |
| Rxrg       | ENSMUSG00000015843  | 1040  | 79   | 760   | 162  | 1102  | 94   | 896   | 96   |
| Samm50     | ENSMUSG00000022437  | 4316  | 204  | 3494  | 463  | 4136  | 107  | 3926  | 74   |
| Sbkl       | ENSMUSG00000042978  | 1288  | 124  | 1004  | 171  | 1329  | 89   | 1218  | 118  |
| Scgb1c1    | ENSMUSG00000038801  | 156   | 23   | 101   | 19   | 163   | 23   | 131   | 27   |
| Scn4a      | ENSMUSG00000001027  | 691   | 157  | 407   | 125  | 675   | 132  | 480   | 75   |
| Scn4b      | ENSMUSG00000046480  | 1055  | 187  | 607   | 202  | 976   | 267  | 669   | 172  |
| Scrn3      | ENSMUSG00000008226  | 772   | 46   | 634   | 36   | 772   | 89   | 686   | 45   |
| Sdhd       | ENSMUSG00000009863  | 12188 | 749  | 9065  | 1722 | 11819 | 503  | 9978  | 990  |
| Sdhd       | ENSMUSG00000058076  | 7127  | 66   | 5010  | 729  | 7101  | 434  | 5730  | 395  |
| Sdr39u1    | ENSMUSG00000022223  | 1168  | 90   | 858   | 177  | 1171  | 36   | 977   | 118  |
| Sel1l      | ENSMUSG00000020964  | 1913  | 94   | 1550  | 157  | 1805  | 94   | 1646  | 186  |
| Sesn1      | ENSMUSG00000038332  | 2443  | 189  | 2090  | 127  | 2405  | 179  | 2161  | 117  |
| Sipa1l2    | ENSMUSG00000001995  | 1430  | 165  | 1122  | 105  | 1540  | 153  | 1327  | 56   |
| Sirt5      | ENSMUSG00000054021  | 574   | 24   | 464   | 39   | 573   | 30   | 507   | 40   |
| Slc16a7    | ENSMUSG00000020102  | 227   | 56   | 144   | 27   | 216   | 67   | 189   | 39   |
| Slc25a11   | ENSMUSG00000014606  | 8077  | 561  | 5928  | 1242 | 7992  | 341  | 6986  | 662  |
| Slc25a12   | ENSMUSG00000027010  | 4184  | 351  | 2893  | 395  | 4194  | 379  | 3611  | 151  |
| Slc25a13   | ENSMUSG00000015112  | 2989  | 324  | 2199  | 145  | 3029  | 276  | 2574  | 268  |
| Slc25a20   | ENSMUSG00000032602  | 3086  | 349  | 2262  | 477  | 3063  | 140  | 2521  | 210  |
| Slc25a3    | ENSMUSG00000061904  | 25015 | 1211 | 18063 | 2479 | 25124 | 1400 | 20806 | 1485 |
| Slc25a33   | ENSMUSG00000028982  | 271   | 36   | 196   | 32   | 254   | 25   | 214   | 18   |
| Slc26a6    | ENSMUSG00000023259  | 159   | 5    | 105   | 24   | 133   | 7    | 122   | 15   |
| Slc2a4     | ENSMUSG00000018566  | 6195  | 156  | 4116  | 759  | 6192  | 600  | 4937  | 362  |
| Slc36a2    | ENSMUSG00000020264  | 315   | 40   | 215   | 36   | 309   | 9    | 239   | 36   |
| Slc38a3    | ENSMUSG00000010064  | 939   | 97   | 638   | 211  | 1037  | 121  | 746   | 126  |
| Slc41a1    | ENSMUSG00000013275  | 1492  | 118  | 1131  | 142  | 1374  | 124  | 1187  | 145  |
| Slc4a4     | ENSMUSG00000060961  | 964   | 160  | 696   | 87   | 861   | 146  | 774   | 132  |
| Slc7a1     | ENSMUSG00000041313  | 1469  | 249  | 990   | 213  | 1397  | 281  | 1151  | 217  |
| Slc9a8     | ENSMUSG00000039463  | 533   | 54   | 422   | 27   | 481   | 53   | 424   | 37   |
| Slco3a1    | ENSMUSG00000025790  | 1897  | 213  | 1577  | 239  | 1938  | 213  | 1809  | 168  |
| Smco1      | ENSMUSG00000046345  | 280   | 33   | 173   | 42   | 270   | 15   | 222   | 35   |
| Smg5       | ENSMUSG00000001415  | 1134  | 42   | 904   | 93   | 1081  | 79   | 1020  | 136  |
| Smim1l     | ENSMUSG00000051989  | 669   | 30   | 545   | 65   | 628   | 41   | 590   | 28   |
| Snai3      | ENSMUSG00000006587  | 49    | 18   | 24    | 5    | 45    | 14   | 35    | 8    |
| Snrpn      | ENSMUSG000000102252 | 939   | 55   | 661   | 136  | 989   | 67   | 760   | 142  |
| Sod1       | ENSMUSG00000022982  | 3578  | 226  | 3002  | 251  | 3367  | 134  | 3215  | 151  |
| Sod2       | ENSMUSG00000006818  | 12266 | 831  | 8665  | 1885 | 11982 | 506  | 9979  | 664  |
| Sord       | ENSMUSG00000027227  | 4541  | 245  | 3023  | 680  | 4444  | 324  | 3516  | 336  |
| Spr        | ENSMUSG00000033735  | 665   | 53   | 505   | 56   | 683   | 71   | 580   | 44   |
| Spsb1      | ENSMUSG00000039911  | 519   | 41   | 383   | 46   | 499   | 68   | 431   | 61   |
| Sptb       | ENSMUSG00000021061  | 3814  | 253  | 2892  | 391  | 4015  | 448  | 3358  | 226  |
| St3gal3    | ENSMUSG00000028538  | 1047  | 50   | 840   | 121  | 1048  | 65   | 941   | 63   |
| St6galnac6 | ENSMUSG00000026811  | 1129  | 64   | 895   | 132  | 1127  | 72   | 981   | 112  |
| Stard10    | ENSMUSG00000030688  | 330   | 75   | 189   | 43   | 297   | 12   | 242   | 66   |
| Stard7     | ENSMUSG00000027367  | 3728  | 299  | 2766  | 387  | 3568  | 81   | 3253  | 316  |
| Stk11      | ENSMUSG00000003068  | 1448  | 37   | 1205  | 94   | 1447  | 59   | 1293  | 70   |
| Ston2      | ENSMUSG00000020961  | 279   | 82   | 178   | 41   | 317   | 59   | 217   | 35   |
| Stub1      | ENSMUSG00000039615  | 1096  | 59   | 905   | 66   | 1104  | 71   | 1014  | 92   |
| Suclg1     | ENSMUSG00000052738  | 6364  | 514  | 4599  | 1021 | 6012  | 279  | 5327  | 363  |
| Suclg2     | ENSMUSG00000061838  | 4105  | 321  | 2961  | 428  | 4037  | 119  | 3294  | 228  |
| Suox       | ENSMUSG00000049858  | 473   | 53   | 354   | 36   | 448   | 32   | 405   | 21   |
| Susd6      | ENSMUSG00000021133  | 2324  | 150  | 1943  | 183  | 2364  | 108  | 2034  | 109  |
| Svip       | ENSMUSG00000074093  | 948   | 93   | 733   | 96   | 873   | 98   | 769   | 67   |
| Swsap1     | ENSMUSG00000051238  | 126   | 10   | 90    | 15   | 118   | 11   | 105   | 11   |
| Syt7       | ENSMUSG00000024743  | 873   | 100  | 595   | 126  | 831   | 116  | 700   | 57   |
| Tango2     | ENSMUSG00000013539  | 2372  | 272  | 1812  | 121  | 2322  | 147  | 1927  | 149  |
| Tango6     | ENSMUSG00000041949  | 231   | 19   | 170   | 17   | 230   | 31   | 201   | 14   |
| Tars2      | ENSMUSG00000028107  | 667   | 59   | 489   | 66   | 606   | 23   | 549   | 66   |
| Tarsl2     | ENSMUSG00000030515  | 1088  | 105  | 839   | 102  | 1083  | 60   | 931   | 19   |
| Taz        | ENSMUSG00000009995  | 683   | 45   | 574   | 36   | 641   | 57   | 573   | 45   |
| Tbrg4      | ENSMUSG00000000384  | 909   | 70   | 673   | 136  | 897   | 113  | 763   | 112  |

|            |                    |        |      |       |       |        |      |       |      |
|------------|--------------------|--------|------|-------|-------|--------|------|-------|------|
| Tcaim      | ENSMUSG00000046603 | 1091   | 140  | 752   | 164   | 1078   | 129  | 865   | 134  |
| Tcap       | ENSMUSG00000007877 | 15023  | 5676 | 9524  | 3481  | 11808  | 3513 | 10365 | 2562 |
| Tcp1112    | ENSMUSG00000020034 | 2121   | 130  | 1478  | 128   | 2131   | 148  | 1765  | 222  |
| Tecrl      | ENSMUSG00000049537 | 1305   | 197  | 1030  | 90    | 1191   | 128  | 1094  | 181  |
| Tent4b     | ENSMUSG00000036779 | 610    | 55   | 482   | 40    | 562    | 52   | 508   | 45   |
| Tesc       | ENSMUSG00000029359 | 1119   | 84   | 854   | 76    | 1160   | 95   | 937   | 103  |
| Thrb       | ENSMUSG00000021779 | 495    | 72   | 351   | 62    | 440    | 76   | 311   | 43   |
| Tmbim6     | ENSMUSG00000023010 | 3804   | 173  | 3339  | 158   | 3817   | 189  | 3501  | 211  |
| Tmc7       | ENSMUSG00000042246 | 203    | 26   | 121   | 17    | 221    | 36   | 169   | 29   |
| Tmem135    | ENSMUSG00000039428 | 983    | 73   | 725   | 115   | 985    | 79   | 815   | 63   |
| Tmem143    | ENSMUSG00000002781 | 1504   | 67   | 919   | 258   | 1446   | 221  | 1083  | 117  |
| Tmem177    | ENSMUSG00000036975 | 283    | 12   | 189   | 34    | 271    | 12   | 216   | 21   |
| Tmem250-ps | ENSMUSG00000087679 | 1255   | 42   | 1017  | 136   | 1234   | 98   | 1140  | 53   |
| Tmem38a    | ENSMUSG00000031791 | 7478   | 344  | 5801  | 950   | 7515   | 482  | 6828  | 346  |
| Tmem50b    | ENSMUSG00000022964 | 927    | 63   | 728   | 73    | 909    | 32   | 769   | 105  |
| Tmem70     | ENSMUSG00000025940 | 1686   | 231  | 1310  | 188   | 1682   | 176  | 1404  | 135  |
| Tmem82     | ENSMUSG00000043085 | 271    | 51   | 168   | 43    | 257    | 20   | 187   | 17   |
| Tmem94     | ENSMUSG00000020747 | 1735   | 172  | 1255  | 258   | 1762   | 215  | 1313  | 178  |
| Tmod1      | ENSMUSG00000028328 | 6866   | 511  | 5456  | 542   | 6671   | 424  | 6180  | 413  |
| Tmod4      | ENSMUSG00000005628 | 378    | 37   | 254   | 60    | 361    | 43   | 317   | 59   |
| Tnfaip8    | ENSMUSG00000062210 | 1646   | 269  | 1190  | 267   | 1502   | 102  | 1310  | 232  |
| Tnip3      | ENSMUSG00000044162 | 52     | 11   | 27    | 13    | 47     | 4    | 42    | 4    |
| Tnni3      | ENSMUSG00000035458 | 63108  | 4479 | 42722 | 10485 | 61514  | 1321 | 48873 | 5226 |
| Tnnt2      | ENSMUSG00000026414 | 110161 | 8926 | 87055 | 9068  | 105408 | 3834 | 92241 | 8335 |
| Tom112     | ENSMUSG00000000538 | 2948   | 122  | 2426  | 287   | 2928   | 258  | 2694  | 186  |
| Trabd2b    | ENSMUSG00000070867 | 3038   | 207  | 2320  | 372   | 3187   | 181  | 2778  | 256  |
| Tsc22d1    | ENSMUSG00000022010 | 4439   | 536  | 3676  | 350   | 4405   | 178  | 4019  | 379  |
| Tspan3     | ENSMUSG00000032324 | 2417   | 116  | 2074  | 132   | 2505   | 165  | 2302  | 52   |
| Tspyl4     | ENSMUSG00000039485 | 376    | 62   | 276   | 18    | 382    | 85   | 298   | 73   |
| Ttc19      | ENSMUSG00000042298 | 902    | 120  | 684   | 71    | 896    | 69   | 748   | 78   |
| Tufm       | ENSMUSG00000073838 | 3132   | 215  | 2311  | 479   | 3147   | 191  | 2714  | 265  |
| Twnk       | ENSMUSG00000025209 | 604    | 21   | 452   | 67    | 607    | 59   | 505   | 23   |
| Txnrd2     | ENSMUSG00000075704 | 527    | 35   | 362   | 47    | 464    | 30   | 431   | 49   |
| Ubac2      | ENSMUSG00000041765 | 482    | 28   | 351   | 27    | 440    | 56   | 380   | 38   |
| Ubl7       | ENSMUSG00000055720 | 695    | 84   | 565   | 67    | 663    | 44   | 641   | 37   |
| Ubr2       | ENSMUSG00000023977 | 2578   | 83   | 1942  | 289   | 2546   | 196  | 2215  | 196  |
| Ucp3       | ENSMUSG00000032942 | 1264   | 355  | 659   | 227   | 1281   | 331  | 698   | 271  |
| Unc45b     | ENSMUSG00000018845 | 3432   | 81   | 2694  | 372   | 3138   | 382  | 2858  | 156  |
| Uqcc1      | ENSMUSG00000005882 | 3454   | 270  | 2476  | 553   | 3363   | 150  | 2909  | 228  |
| Uqcr1      | ENSMUSG00000025651 | 15130  | 710  | 10190 | 2080  | 15168  | 907  | 12233 | 1293 |
| Uqcrfsl    | ENSMUSG00000038462 | 13197  | 914  | 10056 | 1838  | 12772  | 692  | 11183 | 890  |
| Urod       | ENSMUSG00000028684 | 800    | 46   | 616   | 62    | 756    | 47   | 678   | 29   |
| Usf2       | ENSMUSG00000058239 | 1261   | 122  | 1046  | 81    | 1203   | 37   | 1081  | 60   |
| Vcp        | ENSMUSG00000028452 | 9696   | 493  | 8255  | 496   | 9439   | 494  | 9118  | 332  |
| Vdac1      | ENSMUSG00000020402 | 17517  | 801  | 13326 | 1578  | 17010  | 633  | 14751 | 342  |
| Vdac3      | ENSMUSG00000008892 | 6247   | 446  | 4930  | 675   | 5939   | 119  | 5490  | 330  |
| Vegfb      | ENSMUSG00000024962 | 2831   | 191  | 2209  | 301   | 2977   | 265  | 2434  | 179  |
| Vps26a     | ENSMUSG00000020078 | 1810   | 210  | 1524  | 43    | 1767   | 104  | 1632  | 155  |
| Vwa8       | ENSMUSG00000058997 | 6184   | 159  | 4148  | 762   | 5901   | 635  | 4704  | 407  |
| Wbp2       | ENSMUSG00000034341 | 1379   | 72   | 1162  | 115   | 1438   | 101  | 1294  | 92   |
| Wdrc1      | ENSMUSG00000037622 | 1386   | 86   | 1042  | 217   | 1413   | 154  | 1245  | 104  |
| Wfs1       | ENSMUSG00000039474 | 1806   | 82   | 1416  | 252   | 1797   | 191  | 1634  | 135  |
| Whrn       | ENSMUSG00000039137 | 481    | 110  | 307   | 100   | 542    | 79   | 382   | 97   |
| Wnk2       | ENSMUSG00000037989 | 1441   | 166  | 821   | 252   | 1510   | 204  | 1013  | 246  |
| Ybx1       | ENSMUSG00000028639 | 11917  | 513  | 10296 | 764   | 11978  | 639  | 10588 | 490  |
| Ywhae      | ENSMUSG00000020849 | 5973   | 224  | 5142  | 422   | 5882   | 295  | 5570  | 239  |
| Zadh2      | ENSMUSG00000049090 | 1687   | 130  | 1330  | 146   | 1727   | 133  | 1433  | 161  |
| Zfp113     | ENSMUSG00000037007 | 207    | 26   | 137   | 20    | 206    | 31   | 160   | 32   |
| Zfp536     | ENSMUSG00000043456 | 134    | 18   | 70    | 15    | 120    | 18   | 92    | 13   |
| Zfp629     | ENSMUSG00000045639 | 654    | 44   | 510   | 45    | 651    | 90   | 565   | 56   |
| Zfyve21    | ENSMUSG00000021286 | 406    | 15   | 295   | 34    | 394    | 31   | 309   | 42   |
| Znrf1      | ENSMUSG00000033545 | 850    | 52   | 714   | 48    | 788    | 71   | 705   | 40   |



**Supplementary Table S7.** RNASeq analysis of effects of angiotensin II (AngII) on mRNA expression in hearts from PKN2Het vs WT littermates: mRNAs significantly upregulated by AngII in PKN2Het hearts.

| Gene Symbol   | Ensembl gene id    | WT Vehicle |     | WT AngII |      | PKN2Het Vehicle |     | PKN2Het AngII |     |
|---------------|--------------------|------------|-----|----------|------|-----------------|-----|---------------|-----|
|               |                    | Mean       | SD  | Mean     | SD   | Mean            | SD  | Mean          | SD  |
| 1500004A13Rik | ENSMUSG00000098912 | 28         | 5   | 38       | 8    | 20              | 7   | 48            | 20  |
| 4931406P16Rik | ENSMUSG00000066571 | 1213       | 197 | 1375     | 110  | 1210            | 171 | 1441          | 195 |
| 6430584L05Rik | ENSMUSG00000108228 | 2          | 1   | 7        | 2    | 3               | 1   | 69            | 99  |
| AC165271.1    | ENSMUSG00000116641 | 7          | 2   | 16       | 5    | 5               | 2   | 19            | 12  |
| Adgrd1        | ENSMUSG00000044017 | 191        | 51  | 269      | 56   | 169             | 19  | 249           | 49  |
| Akap2         | ENSMUSG00000038729 | 3768       | 234 | 4279     | 435  | 3521            | 379 | 4095          | 258 |
| Aldh18a1      | ENSMUSG00000025007 | 242        | 27  | 280      | 13   | 215             | 33  | 299           | 35  |
| Ano6          | ENSMUSG00000064210 | 778        | 83  | 929      | 100  | 694             | 56  | 876           | 34  |
| Anp32b        | ENSMUSG00000028333 | 1235       | 54  | 1423     | 104  | 1216            | 59  | 1418          | 76  |
| Arhgef12      | ENSMUSG00000059495 | 6349       | 600 | 6661     | 1008 | 6125            | 289 | 7218          | 254 |
| Arrb1         | ENSMUSG00000018909 | 877        | 101 | 1086     | 152  | 816             | 90  | 1086          | 112 |
| Atp8b2        | ENSMUSG00000060671 | 531        | 139 | 704      | 103  | 413             | 28  | 673           | 34  |
| Atxn1l        | ENSMUSG00000069895 | 724        | 111 | 785      | 64   | 708             | 86  | 852           | 141 |
| B3gnt3        | ENSMUSG00000031803 | 234        | 39  | 304      | 15   | 213             | 12  | 289           | 30  |
| C5ar1         | ENSMUSG00000049130 | 107        | 17  | 173      | 40   | 78              | 18  | 156           | 56  |
| Capn2         | ENSMUSG00000026509 | 2021       | 126 | 2295     | 152  | 1873            | 94  | 2199          | 142 |
| Ccl12         | ENSMUSG00000035352 | 28         | 12  | 76       | 30   | 20              | 5   | 61            | 36  |
| Ccl2          | ENSMUSG00000035385 | 56         | 15  | 106      | 46   | 42              | 6   | 111           | 80  |
| Cd302         | ENSMUSG00000060703 | 206        | 18  | 297      | 71   | 176             | 17  | 266           | 37  |
| Cdc42ep4      | ENSMUSG00000041598 | 293        | 84  | 306      | 18   | 242             | 49  | 312           | 39  |
| Cdc42se1      | ENSMUSG00000046722 | 468        | 71  | 617      | 41   | 442             | 53  | 554           | 68  |
| Cebpa         | ENSMUSG00000034957 | 116        | 16  | 166      | 28   | 115             | 23  | 164           | 26  |
| Cenpi         | ENSMUSG00000031262 | 14         | 6   | 28       | 12   | 6               | 3   | 28            | 9   |
| Ces2e         | ENSMUSG00000031886 | 82         | 18  | 89       | 16   | 65              | 19  | 108           | 34  |
| Clic5         | ENSMUSG00000023959 | 7647       | 453 | 8817     | 809  | 7809            | 595 | 9603          | 708 |
| Cmklr1        | ENSMUSG00000042190 | 507        | 144 | 618      | 103  | 422             | 100 | 579           | 89  |
| Col4a3        | ENSMUSG00000079465 | 203        | 49  | 299      | 93   | 199             | 27  | 307           | 35  |
| Cyb56l        | ENSMUSG00000019590 | 237        | 62  | 314      | 54   | 200             | 32  | 299           | 78  |
| Cyb5r1        | ENSMUSG00000026456 | 363        | 22  | 410      | 23   | 351             | 26  | 444           | 45  |
| Dbn2          | ENSMUSG00000017734 | 265        | 25  | 310      | 15   | 218             | 53  | 285           | 36  |
| Ddah2         | ENSMUSG00000007039 | 240        | 14  | 299      | 36   | 214             | 30  | 292           | 28  |
| Ddr2          | ENSMUSG00000026674 | 1034       | 140 | 1163     | 154  | 869             | 156 | 1130          | 83  |
| Dpysl2        | ENSMUSG00000022048 | 377        | 57  | 499      | 48   | 329             | 67  | 433           | 23  |
| Dsn1          | ENSMUSG00000027635 | 32         | 10  | 50       | 10   | 25              | 6   | 47            | 8   |
| Eif4a1        | ENSMUSG00000059796 | 3380       | 300 | 3664     | 494  | 3084            | 168 | 3826          | 261 |
| Elmo1         | ENSMUSG00000041112 | 303        | 38  | 395      | 22   | 278             | 56  | 438           | 50  |
| Elov1l        | ENSMUSG00000006390 | 286        | 23  | 361      | 51   | 246             | 37  | 316           | 43  |
| Enc1          | ENSMUSG00000041773 | 293        | 76  | 382      | 15   | 273             | 69  | 390           | 41  |
| Erf           | ENSMUSG00000040857 | 309        | 56  | 363      | 54   | 285             | 58  | 372           | 48  |
| Fabp5         | ENSMUSG00000027533 | 788        | 95  | 996      | 167  | 674             | 83  | 989           | 37  |
| Fam102b       | ENSMUSG00000040339 | 516        | 79  | 657      | 85   | 447             | 67  | 598           | 79  |
| Fgf6          | ENSMUSG00000000183 | 19         | 11  | 37       | 18   | 16              | 6   | 40            | 17  |
| Fkbp5         | ENSMUSG00000024222 | 356        | 106 | 469      | 65   | 289             | 55  | 412           | 74  |
| Gba           | ENSMUSG00000028048 | 219        | 25  | 275      | 46   | 194             | 36  | 270           | 21  |
| Gm10275       | ENSMUSG00000069682 | 2119       | 213 | 2280     | 303  | 1958            | 234 | 2331          | 159 |
| Gm14005       | ENSMUSG00000074813 | 25         | 6   | 32       | 5    | 23              | 3   | 43            | 5   |
| Gm15542       | ENSMUSG00000083396 | 41         | 20  | 74       | 30   | 32              | 14  | 92            | 41  |
| Gm21188       | ENSMUSG00000095609 | 24         | 11  | 52       | 38   | 12              | 6   | 39            | 17  |
| Gm8430        | ENSMUSG00000055093 | 747        | 208 | 891      | 177  | 614             | 182 | 1041          | 66  |
| Gngt2         | ENSMUSG00000038811 | 179        | 19  | 226      | 24   | 170             | 41  | 224           | 28  |
| Hbegf         | ENSMUSG00000024486 | 285        | 26  | 375      | 79   | 293             | 20  | 445           | 97  |
| Hmox1         | ENSMUSG00000005413 | 189        | 79  | 278      | 49   | 151             | 19  | 270           | 45  |
| Hnrnpf        | ENSMUSG00000042079 | 2929       | 181 | 3120     | 203  | 2667            | 95  | 3177          | 258 |
| Hnrnpk        | ENSMUSG00000021546 | 4424       | 263 | 4608     | 377  | 3979            | 132 | 4710          | 317 |
| Hsp90aa1      | ENSMUSG00000021270 | 4809       | 792 | 5821     | 774  | 4154            | 437 | 5635          | 799 |
| Id3           | ENSMUSG00000007872 | 547        | 96  | 629      | 46   | 503             | 70  | 613           | 81  |
| Ier5          | ENSMUSG00000056708 | 536        | 123 | 783      | 105  | 482             | 61  | 803           | 298 |
| Ilk           | ENSMUSG00000030890 | 1549       | 39  | 1714     | 90   | 1475            | 117 | 1685          | 57  |
| Itpr2         | ENSMUSG00000030287 | 666        | 151 | 771      | 158  | 613             | 94  | 776           | 101 |

|         |                    |      |     |      |     |      |     |      |     |
|---------|--------------------|------|-----|------|-----|------|-----|------|-----|
| Jpt1    | ENSMUSG00000020737 | 841  | 76  | 987  | 49  | 790  | 37  | 1002 | 107 |
| Jpt2    | ENSMUSG00000024165 | 169  | 19  | 197  | 35  | 141  | 33  | 226  | 44  |
| Lama2   | ENSMUSG00000019899 | 3507 | 352 | 3968 | 325 | 3362 | 180 | 4015 | 379 |
| Layn    | ENSMUSG00000060594 | 73   | 12  | 116  | 39  | 72   | 19  | 117  | 25  |
| Limal   | ENSMUSG00000023022 | 869  | 137 | 1044 | 86  | 750  | 124 | 1003 | 145 |
| Ly6a    | ENSMUSG00000075602 | 1892 | 294 | 2356 | 309 | 1658 | 287 | 2262 | 203 |
| Mad2l1  | ENSMUSG00000029910 | 111  | 20  | 150  | 33  | 90   | 23  | 154  | 23  |
| Map6    | ENSMUSG00000055407 | 108  | 31  | 142  | 36  | 87   | 9   | 129  | 34  |
| Mcm10   | ENSMUSG00000026669 | 14   | 6   | 30   | 10  | 8    | 7   | 26   | 18  |
| Mcm3    | ENSMUSG00000041859 | 156  | 21  | 214  | 41  | 148  | 27  | 240  | 53  |
| Mcm5    | ENSMUSG00000005410 | 84   | 12  | 162  | 45  | 83   | 19  | 169  | 35  |
| Mcm6    | ENSMUSG00000026355 | 230  | 32  | 397  | 77  | 216  | 18  | 363  | 70  |
| Mgat5b  | ENSMUSG00000043857 | 8    | 5   | 23   | 15  | 9    | 5   | 31   | 24  |
| Mmrn2   | ENSMUSG00000041445 | 1117 | 202 | 1171 | 66  | 966  | 115 | 1226 | 136 |
| Mob3a   | ENSMUSG00000003348 | 134  | 17  | 176  | 20  | 115  | 24  | 176  | 43  |
| Mybl1   | ENSMUSG00000025912 | 20   | 8   | 40   | 11  | 22   | 4   | 48   | 10  |
| Myo1c   | ENSMUSG00000017774 | 2939 | 140 | 3445 | 280 | 2807 | 136 | 3414 | 203 |
| Ncf2    | ENSMUSG00000026480 | 117  | 30  | 183  | 21  | 107  | 29  | 174  | 52  |
| Nrp2    | ENSMUSG00000025969 | 1954 | 236 | 2425 | 238 | 1836 | 224 | 2427 | 166 |
| Nuak1   | ENSMUSG00000020032 | 841  | 90  | 1047 | 199 | 819  | 26  | 1165 | 278 |
| Nudt18  | ENSMUSG00000045211 | 271  | 21  | 330  | 55  | 259  | 36  | 362  | 63  |
| Numb    | ENSMUSG00000021224 | 620  | 116 | 600  | 28  | 522  | 54  | 673  | 44  |
| Nusap1  | ENSMUSG00000027306 | 48   | 17  | 132  | 40  | 45   | 9   | 116  | 36  |
| Ophn1   | ENSMUSG00000031214 | 212  | 70  | 246  | 57  | 195  | 73  | 284  | 69  |
| Pald1   | ENSMUSG00000020092 | 474  | 36  | 537  | 61  | 417  | 42  | 544  | 37  |
| Papln   | ENSMUSG00000021223 | 369  | 42  | 478  | 84  | 367  | 37  | 494  | 57  |
| Parva   | ENSMUSG00000030770 | 1225 | 61  | 1409 | 154 | 1113 | 88  | 1320 | 96  |
| Pcolce2 | ENSMUSG00000015354 | 412  | 82  | 494  | 81  | 352  | 55  | 503  | 72  |
| Pdlim1  | ENSMUSG00000055044 | 1237 | 36  | 1524 | 182 | 1078 | 86  | 1607 | 176 |
| Pecam1  | ENSMUSG00000020717 | 4184 | 537 | 5065 | 334 | 3964 | 407 | 4742 | 324 |
| Pid1    | ENSMUSG00000045658 | 275  | 53  | 338  | 14  | 244  | 37  | 314  | 29  |
| Pilra   | ENSMUSG00000046245 | 31   | 5   | 52   | 15  | 24   | 9   | 52   | 20  |
| Pole2   | ENSMUSG00000020974 | 16   | 7   | 31   | 8   | 12   | 5   | 33   | 6   |
| Prg4    | ENSMUSG00000006014 | 323  | 89  | 484  | 130 | 321  | 33  | 596  | 281 |
| Ptx3    | ENSMUSG00000027832 | 9    | 5   | 35   | 23  | 8    | 2   | 42   | 47  |
| Rab15   | ENSMUSG00000021062 | 19   | 12  | 25   | 4   | 11   | 5   | 30   | 8   |
| Rad54l  | ENSMUSG00000028702 | 11   | 9   | 22   | 6   | 6    | 2   | 28   | 11  |
| Ralb    | ENSMUSG00000004451 | 600  | 34  | 674  | 33  | 559  | 34  | 691  | 29  |
| Raph1   | ENSMUSG00000026014 | 2057 | 244 | 2567 | 254 | 1871 | 214 | 2337 | 313 |
| Rasa3   | ENSMUSG00000031453 | 585  | 66  | 758  | 73  | 582  | 31  | 773  | 108 |
| Rhog    | ENSMUSG00000073982 | 297  | 22  | 355  | 35  | 256  | 29  | 324  | 32  |
| Ripk3   | ENSMUSG00000022221 | 56   | 11  | 90   | 28  | 34   | 8   | 84   | 24  |
| Rpl3    | ENSMUSG00000060036 | 3377 | 296 | 4471 | 607 | 3263 | 335 | 4320 | 344 |
| Rpl39   | ENSMUSG00000079641 | 2170 | 187 | 2489 | 536 | 1860 | 274 | 2471 | 431 |
| Rps27l  | ENSMUSG00000036781 | 985  | 107 | 1026 | 159 | 889  | 103 | 1140 | 141 |
| Rras    | ENSMUSG00000038387 | 425  | 64  | 533  | 56  | 410  | 35  | 523  | 72  |
| Sema7a  | ENSMUSG00000038264 | 731  | 163 | 865  | 32  | 659  | 93  | 882  | 92  |
| Sh3gl1  | ENSMUSG00000003200 | 234  | 18  | 296  | 44  | 217  | 29  | 272  | 16  |
| Slc39a1 | ENSMUSG00000052310 | 1324 | 29  | 1471 | 82  | 1256 | 48  | 1467 | 64  |
| Slc3a2  | ENSMUSG00000010095 | 496  | 50  | 522  | 83  | 462  | 51  | 597  | 75  |
| Sorbs3  | ENSMUSG00000022091 | 627  | 75  | 731  | 50  | 570  | 54  | 681  | 36  |
| Spsb4   | ENSMUSG00000046997 | 117  | 24  | 148  | 47  | 116  | 20  | 180  | 48  |
| Srpx    | ENSMUSG00000090084 | 56   | 2   | 104  | 41  | 56   | 6   | 108  | 42  |
| Thsd1   | ENSMUSG00000031480 | 201  | 35  | 239  | 30  | 176  | 24  | 246  | 27  |
| Tinagl1 | ENSMUSG00000028776 | 767  | 115 | 841  | 137 | 702  | 142 | 896  | 129 |
| Troap   | ENSMUSG00000032783 | 9    | 3   | 20   | 8   | 5    | 3   | 20   | 13  |
| Tspan9  | ENSMUSG00000030352 | 1563 | 131 | 1947 | 401 | 1621 | 98  | 2180 | 218 |
| Tubb2a  | ENSMUSG00000058672 | 572  | 55  | 703  | 94  | 505  | 25  | 707  | 148 |
| Tubb6   | ENSMUSG00000001473 | 337  | 29  | 445  | 93  | 318  | 39  | 459  | 50  |
| Vsig4   | ENSMUSG00000044206 | 33   | 11  | 57   | 21  | 28   | 10  | 77   | 29  |
| Wdr1    | ENSMUSG00000005103 | 2521 | 253 | 2721 | 220 | 2501 | 131 | 3026 | 227 |
| Wfdc17  | ENSMUSG00000069792 | 126  | 27  | 205  | 64  | 117  | 24  | 230  | 60  |
| Ywhab   | ENSMUSG00000018326 | 2036 | 61  | 2287 | 69  | 1970 | 113 | 2268 | 129 |
| Ywhah   | ENSMUSG00000018965 | 1422 | 86  | 1708 | 173 | 1342 | 151 | 1658 | 195 |

**Supplementary Table S8.** RNASeq analysis of effects of angiotensin II (AngII) on mRNA expression in hearts from PKN2Het vs WT littermates: mRNAs significantly downregulated by AngII in PKN2Het hearts.

| Gene Symbol | Ensembl gene id    | WT Vehicle |        | WT AngII |        | PKN2Het Vehicle |        | PKN2Het AngII |        |
|-------------|--------------------|------------|--------|----------|--------|-----------------|--------|---------------|--------|
|             |                    | Mean       | SD     | Mean     | SD     | Mean            | SD     | Mean          | SD     |
| Abcb7       | ENSMUSG00000031333 | 1213       | 155    | 1016     | 47     | 1337            | 171    | 1067          | 172    |
| AC161607.1  | ENSMUSG00000116903 | 73         | 23     | 44       | 12     | 85              | 11     | 52            | 12     |
| Acaca       | ENSMUSG00000020532 | 559        | 140    | 447      | 82     | 557             | 121    | 494           | 41     |
| Antxr2      | ENSMUSG00000029338 | 3138       | 199    | 2527     | 322    | 3402            | 377    | 2661          | 386    |
| Arl8b       | ENSMUSG00000030105 | 1872       | 115    | 1674     | 157    | 2035            | 143    | 1684          | 79     |
| Art4        | ENSMUSG00000030217 | 412        | 21     | 326      | 68     | 438             | 37     | 298           | 89     |
| Atl2        | ENSMUSG00000059811 | 1046       | 62     | 921      | 131    | 1052            | 45     | 882           | 97     |
| Atxn2       | ENSMUSG00000042605 | 1186       | 207    | 1021     | 195    | 1395            | 65     | 1084          | 156    |
| Bicra       | ENSMUSG00000070808 | 259        | 26     | 236      | 41     | 304             | 46     | 218           | 25     |
| Carnmt1     | ENSMUSG00000024726 | 1249       | 241    | 1074     | 205    | 1403            | 244    | 1098          | 142    |
| Carns1      | ENSMUSG00000075289 | 373        | 32     | 286      | 27     | 383             | 53     | 289           | 49     |
| Cited2      | ENSMUSG00000039910 | 544        | 99     | 394      | 73     | 713             | 201    | 447           | 51     |
| Cog5        | ENSMUSG00000035933 | 1358       | 209    | 1191     | 133    | 1404            | 218    | 1168          | 103    |
| Dcaf12l1    | ENSMUSG00000045284 | 80         | 13     | 49       | 12     | 91              | 12     | 54            | 16     |
| Dgke        | ENSMUSG00000000276 | 588        | 81     | 456      | 38     | 628             | 87     | 483           | 103    |
| Dhtkd1      | ENSMUSG00000025815 | 67         | 13     | 46       | 8      | 98              | 24     | 53            | 13     |
| Eml5        | ENSMUSG00000051166 | 129        | 41     | 106      | 30     | 156             | 42     | 80            | 35     |
| Fam84a      | ENSMUSG00000020607 | 17         | 9      | 9        | 4      | 31              | 21     | 9             | 5      |
| Fam84b      | ENSMUSG00000072568 | 367        | 45     | 332      | 38     | 416             | 37     | 306           | 21     |
| Fbxo3       | ENSMUSG00000027180 | 1943       | 149    | 1714     | 52     | 1982            | 135    | 1735          | 155    |
| Fgd4        | ENSMUSG00000022788 | 952        | 82     | 788      | 50     | 1006            | 124    | 808           | 116    |
| Fnip1       | ENSMUSG00000035992 | 1689       | 280    | 1464     | 146    | 1814            | 202    | 1491          | 143    |
| Gab1        | ENSMUSG00000031714 | 1294       | 55     | 1103     | 118    | 1362            | 98     | 1139          | 128    |
| Gm47283     | ENSMUSG00000096768 | 121        | 68     | 133      | 40     | 164             | 81     | 81            | 49     |
| Hbp1        | ENSMUSG00000002996 | 1726       | 184    | 1572     | 147    | 1798            | 134    | 1552          | 102    |
| Hccs        | ENSMUSG00000031352 | 997        | 84     | 858      | 98     | 1041            | 148    | 890           | 60     |
| Hspa12a     | ENSMUSG00000025092 | 841        | 91     | 689      | 87     | 938             | 90     | 730           | 91     |
| Jmy         | ENSMUSG00000021690 | 1390       | 158    | 1200     | 90     | 1500            | 137    | 1234          | 114    |
| Kcnh2       | ENSMUSG00000038319 | 847        | 124    | 668      | 110    | 912             | 148    | 635           | 80     |
| Kcnj2       | ENSMUSG00000041695 | 1344       | 337    | 915      | 199    | 1453            | 205    | 945           | 234    |
| Laptm4b     | ENSMUSG00000022257 | 953        | 46     | 801      | 57     | 990             | 41     | 803           | 90     |
| Lysmd4      | ENSMUSG00000043831 | 351        | 36     | 275      | 32     | 399             | 40     | 293           | 44     |
| Mef2a       | ENSMUSG00000030557 | 4209       | 341    | 3602     | 223    | 4401            | 428    | 3617          | 183    |
| Mef2d       | ENSMUSG00000001419 | 2886       | 195    | 2459     | 352    | 3285            | 449    | 2564          | 203    |
| Mif4gd      | ENSMUSG00000020743 | 399        | 41     | 345      | 38     | 434             | 39     | 328           | 28     |
| mt-Nd2      | ENSMUSG00000064345 | 563587     | 132806 | 437281   | 99302  | 600917          | 101879 | 466929        | 126476 |
| mt-Nd5      | ENSMUSG00000064367 | 810634     | 162252 | 639879   | 106231 | 854483          | 106054 | 682450        | 132819 |
| Myo5c       | ENSMUSG00000033590 | 102        | 18     | 90       | 31     | 150             | 35     | 66            | 21     |
| Nnt         | ENSMUSG00000025453 | 5147       | 1691   | 3697     | 588    | 6332            | 1498   | 4488          | 661    |
| Osbpl1a     | ENSMUSG00000044252 | 1430       | 127    | 1177     | 138    | 1477            | 68     | 1236          | 73     |
| Pkd2l2      | ENSMUSG00000014503 | 119        | 20     | 90       | 8      | 123             | 12     | 80            | 8      |
| Plag1       | ENSMUSG00000003282 | 111        | 11     | 86       | 16     | 110             | 13     | 71            | 14     |
| Plin5       | ENSMUSG00000011305 | 1427       | 167    | 1055     | 258    | 1589            | 193    | 1116          | 132    |
| Plxnb3      | ENSMUSG00000031385 | 47         | 14     | 32       | 7      | 53              | 9      | 26            | 4      |
| Pnrc1       | ENSMUSG00000040128 | 1394       | 186    | 1223     | 251    | 1670            | 151    | 1176          | 94     |
| Prox1       | ENSMUSG00000010175 | 2013       | 472    | 1483     | 298    | 2390            | 394    | 1685          | 308    |
| Ptpru       | ENSMUSG00000028909 | 76         | 23     | 56       | 21     | 65              | 20     | 34            | 14     |
| Pygo1       | ENSMUSG00000034910 | 734        | 66     | 583      | 66     | 821             | 99     | 642           | 73     |
| Retreg1     | ENSMUSG00000022270 | 4914       | 645    | 4621     | 579    | 5580            | 346    | 4633          | 468    |
| Rorc        | ENSMUSG00000028150 | 820        | 185    | 636      | 99     | 951             | 111    | 730           | 106    |
| Rsb1l1      | ENSMUSG00000039968 | 486        | 32     | 495      | 68     | 547             | 61     | 451           | 62     |
| Sall4       | ENSMUSG00000027547 | 38         | 19     | 25       | 17     | 54              | 31     | 20            | 2      |
| Sc5d        | ENSMUSG00000032018 | 453        | 51     | 403      | 59     | 480             | 34     | 405           | 25     |
| Slc25a22    | ENSMUSG00000019082 | 545        | 113    | 458      | 107    | 575             | 57     | 418           | 70     |
| Slc25a46    | ENSMUSG00000024259 | 1632       | 281    | 1428     | 165    | 1805            | 227    | 1528          | 184    |
| Slc40a1     | ENSMUSG00000025993 | 540        | 85     | 413      | 68     | 525             | 93     | 369           | 33     |
| Slc5a6      | ENSMUSG00000006641 | 210        | 13     | 153      | 42     | 237             | 30     | 148           | 21     |
| Slc9a2      | ENSMUSG00000026062 | 118        | 24     | 98       | 34     | 103             | 34     | 64            | 9      |

|          |                    |       |      |       |      |       |      |       |      |
|----------|--------------------|-------|------|-------|------|-------|------|-------|------|
| Slf1     | ENSMUSG00000021597 | 700   | 128  | 591   | 68   | 734   | 132  | 561   | 98   |
| Smarcd1  | ENSMUSG00000023018 | 561   | 16   | 444   | 69   | 610   | 82   | 467   | 65   |
| Sobp     | ENSMUSG00000038248 | 528   | 23   | 434   | 59   | 594   | 52   | 453   | 47   |
| Sorcs2   | ENSMUSG00000029093 | 323   | 58   | 246   | 26   | 327   | 75   | 216   | 35   |
| Sp4      | ENSMUSG00000025323 | 262   | 26   | 223   | 14   | 286   | 22   | 209   | 16   |
| Stk39    | ENSMUSG00000027030 | 2038  | 169  | 1731  | 250  | 2027  | 268  | 1564  | 136  |
| Tmem161a | ENSMUSG00000002342 | 695   | 40   | 602   | 58   | 708   | 61   | 579   | 56   |
| Tmem170b | ENSMUSG00000087370 | 544   | 52   | 444   | 44   | 603   | 78   | 462   | 26   |
| Tmem238  | ENSMUSG00000030431 | 17    | 16   | 16    | 5    | 31    | 9    | 10    | 4    |
| Tob1     | ENSMUSG00000037573 | 692   | 101  | 631   | 35   | 830   | 74   | 668   | 42   |
| Trmt2b   | ENSMUSG00000067369 | 1295  | 120  | 1099  | 134  | 1300  | 53   | 1109  | 91   |
| Ttc30a1  | ENSMUSG00000075271 | 133   | 38   | 110   | 17   | 165   | 28   | 117   | 20   |
| Ttc30b   | ENSMUSG00000075273 | 431   | 88   | 337   | 29   | 476   | 71   | 363   | 72   |
| Txnip    | ENSMUSG00000038393 | 13919 | 3376 | 11722 | 2478 | 18708 | 3486 | 12475 | 1810 |
| Ubc      | ENSMUSG00000008348 | 13447 | 4055 | 10872 | 1508 | 16818 | 2949 | 12228 | 2263 |
| Ube2b    | ENSMUSG00000020390 | 4614  | 513  | 4036  | 428  | 4668  | 348  | 4142  | 342  |
| Ulk1     | ENSMUSG00000029512 | 1687  | 77   | 1424  | 156  | 1856  | 253  | 1452  | 92   |
| Vps13a   | ENSMUSG00000046230 | 1184  | 126  | 1087  | 104  | 1354  | 142  | 1101  | 159  |
| Ythdf3   | ENSMUSG00000047213 | 1491  | 106  | 1342  | 61   | 1508  | 114  | 1305  | 117  |
| Zbtb18   | ENSMUSG00000063659 | 834   | 109  | 672   | 89   | 963   | 89   | 675   | 105  |
| Zfp292   | ENSMUSG00000039967 | 872   | 86   | 749   | 89   | 898   | 77   | 715   | 84   |

**Supplementary Table S9.** RNASeq data: gene clusters.

| Gene Symbol                 | Ensembl gene id    | WT Vehicle |      | WT AngII |       | PKN2Het Vehicle |     | PKN2Het AngII |      |
|-----------------------------|--------------------|------------|------|----------|-------|-----------------|-----|---------------|------|
|                             |                    | Mean       | SD   | Mean     | SD    | Mean            | SD  | Mean          | SD   |
| <b>Complement</b>           |                    |            |      |          |       |                 |     |               |      |
| C1qa                        | ENSMUSG00000036887 | 895        | 96   | 1523     | 250   | 883             | 97  | 1362          | 183  |
| C1qb                        | ENSMUSG00000036905 | 826        | 111  | 1513     | 429   | 782             | 128 | 1330          | 245  |
| C1qc                        | ENSMUSG00000036896 | 886        | 106  | 1454     | 199   | 845             | 131 | 1290          | 171  |
| C1qtnf3                     | ENSMUSG00000058914 | 3          | 2    | 341      | 632   | 3               | 2   | 118           | 157  |
| C1qtnf5                     | ENSMUSG00000079592 | 53         | 6    | 100      | 38    | 61              | 17  | 87            | 20   |
| C1qtnf6                     | ENSMUSG00000022440 | 122        | 21   | 426      | 250   | 120             | 11  | 348           | 107  |
| C1qtnf7                     | ENSMUSG00000061535 | 178        | 26   | 294      | 78    | 174             | 31  | 227           | 32   |
| C3ar1                       | ENSMUSG00000040552 | 234        | 31   | 502      | 241   | 242             | 41  | 380           | 97   |
| C4b                         | ENSMUSG00000073418 | 231        | 28   | 604      | 141   | 295             | 41  | 861           | 703  |
| C5ar1                       | ENSMUSG00000049130 | 107        | 17   | 173      | 40    | 78              | 18  | 156           | 56   |
| Cfb                         | ENSMUSG00000090231 | 36         | 7    | 140      | 61    | 33              | 15  | 114           | 78   |
| <b>Extracellular matrix</b> |                    |            |      |          |       |                 |     |               |      |
| Acan                        | ENSMUSG00000030607 | 4          | 3    | 66       | 49    | 3               | 1   | 32            | 34   |
| Aspn                        | ENSMUSG00000021388 | 750        | 159  | 3970     | 5012  | 798             | 171 | 1825          | 1043 |
| Bgn                         | ENSMUSG00000031375 | 5175       | 520  | 12514    | 5386  | 5152            | 464 | 9491          | 2127 |
| Ccdc80                      | ENSMUSG00000022665 | 1816       | 295  | 3479     | 1261  | 1843            | 168 | 2847          | 551  |
| Col11a1                     | ENSMUSG00000027966 | 2          | 3    | 52       | 76    | 2               | 2   | 12            | 11   |
| Col12a1                     | ENSMUSG00000032332 | 47         | 12   | 495      | 623   | 42              | 10  | 315           | 288  |
| Col14a1                     | ENSMUSG00000022371 | 466        | 75   | 1493     | 1179  | 377             | 75  | 1075          | 556  |
| Col15a1                     | ENSMUSG00000028339 | 2833       | 383  | 5668     | 1135  | 3175            | 509 | 5335          | 1392 |
| Col16a1                     | ENSMUSG00000040690 | 187        | 39   | 603      | 471   | 192             | 60  | 420           | 186  |
| Col18a1                     | ENSMUSG00000001435 | 248        | 28   | 790      | 244   | 293             | 35  | 541           | 181  |
| Col1a1                      | ENSMUSG00000001506 | 1941       | 334  | 10243    | 9888  | 2115            | 63  | 5954          | 3420 |
| Col1a2                      | ENSMUSG00000029661 | 2657       | 250  | 11812    | 10867 | 2786            | 231 | 7551          | 4300 |
| Col3a1                      | ENSMUSG00000026043 | 5494       | 744  | 25906    | 20347 | 5871            | 824 | 16747         | 9657 |
| Col4a1                      | ENSMUSG00000031502 | 12856      | 2211 | 23909    | 1751  | 13123           | 855 | 20837         | 3837 |
| Col4a2                      | ENSMUSG00000031503 | 9490       | 1105 | 15270    | 591   | 9814            | 526 | 14603         | 2361 |
| Col4a3                      | ENSMUSG00000079465 | 203        | 49   | 299      | 93    | 199             | 27  | 307           | 35   |
| Col4a4                      | ENSMUSG00000067158 | 345        | 73   | 497      | 114   | 364             | 54  | 494           | 37   |
| Col4a5                      | ENSMUSG00000031274 | 763        | 91   | 1159     | 304   | 773             | 91  | 971           | 147  |
| Col5a1                      | ENSMUSG00000026837 | 1205       | 173  | 3410     | 1633  | 1238            | 85  | 2682          | 1054 |
| Col5a2                      | ENSMUSG00000026042 | 878        | 65   | 4055     | 3237  | 927             | 105 | 2738          | 1563 |
| Col5a3                      | ENSMUSG00000004098 | 576        | 178  | 985      | 63    | 666             | 103 | 847           | 222  |
| Col6a1                      | ENSMUSG00000001119 | 2071       | 252  | 3943     | 1376  | 2047            | 155 | 3242          | 704  |
| Col6a2                      | ENSMUSG00000020241 | 2038       | 291  | 3824     | 981   | 2062            | 139 | 3256          | 743  |
| Col6a3                      | ENSMUSG00000048126 | 1170       | 165  | 2685     | 1137  | 1119            | 203 | 1895          | 452  |
| Col7a1                      | ENSMUSG00000025650 | 4          | 6    | 26       | 21    | 5               | 4   | 11            | 6    |
| Col8a1                      | ENSMUSG00000068196 | 704        | 96   | 3461     | 2170  | 747             | 153 | 2473          | 1081 |
| Col8a2                      | ENSMUSG00000056174 | 9          | 5    | 180      | 298   | 14              | 4   | 86            | 85   |
| Col9a2                      | ENSMUSG00000028626 | 6          | 1    | 31       | 38    | 7               | 4   | 21            | 11   |
| Comp                        | ENSMUSG00000031849 | 39         | 8    | 325      | 426   | 69              | 9   | 179           | 129  |
| Crtap                       | ENSMUSG00000032431 | 384        | 57   | 511      | 72    | 379             | 32  | 471           | 67   |
| Cthrc1                      | ENSMUSG00000054196 | 3          | 3    | 221      | 380   | 5               | 2   | 92            | 112  |
| Ecm1                        | ENSMUSG00000028108 | 452        | 86   | 696      | 127   | 464             | 82  | 720           | 136  |
| Egflam                      | ENSMUSG00000042961 | 374        | 53   | 240      | 63    | 279             | 55  | 262           | 40   |
| Eln                         | ENSMUSG00000029675 | 512        | 176  | 2249     | 1534  | 591             | 55  | 1327          | 606  |
| Fbln2                       | ENSMUSG00000064080 | 1827       | 201  | 3200     | 493   | 1966            | 214 | 3008          | 422  |
| Fbn1                        | ENSMUSG00000027204 | 2671       | 543  | 7690     | 2514  | 3011            | 303 | 6532          | 2277 |
| Fbn2                        | ENSMUSG00000024598 | 25         | 8    | 112      | 120   | 38              | 10  | 67            | 32   |
| Fgl2                        | ENSMUSG00000039899 | 863        | 65   | 1693     | 575   | 912             | 106 | 1331          | 391  |
| Flna                        | ENSMUSG00000031328 | 4014       | 455  | 5769     | 673   | 3783            | 774 | 4951          | 309  |
| Fn1                         | ENSMUSG00000026193 | 1579       | 300  | 7830     | 6886  | 1494            | 199 | 4711          | 3367 |
| Frem1                       | ENSMUSG00000059049 | 8          | 10   | 51       | 68    | 8               | 4   | 31            | 24   |
| Has2                        | ENSMUSG00000022367 | 27         | 6    | 50       | 13    | 28              | 8   | 42            | 6    |
| Hspg2                       | ENSMUSG00000028763 | 12506      | 1017 | 15279    | 1628  | 12610           | 707 | 14990         | 1190 |
| Lama2                       | ENSMUSG00000019899 | 3507       | 352  | 3968     | 325   | 3362            | 180 | 4015          | 379  |
| Lama4                       | ENSMUSG00000019846 | 2464       | 138  | 3226     | 192   | 2291            | 264 | 3050          | 270  |
| Lamb1                       | ENSMUSG00000002900 | 2656       | 308  | 3500     | 191   | 2690            | 265 | 3282          | 467  |
| Lamc1                       | ENSMUSG00000026478 | 4969       | 490  | 7157     | 380   | 5155            | 283 | 6688          | 486  |

|                              |                    |       |      |       |       |       |      |       |      |
|------------------------------|--------------------|-------|------|-------|-------|-------|------|-------|------|
| Lox                          | ENSMUSG00000024529 | 89    | 9    | 1050  | 1321  | 94    | 21   | 476   | 436  |
| Loxl1                        | ENSMUSG00000032334 | 618   | 97   | 1447  | 604   | 687   | 57   | 1181  | 257  |
| Loxl2                        | ENSMUSG00000034205 | 724   | 133  | 1635  | 127   | 683   | 84   | 1403  | 383  |
| Loxl3                        | ENSMUSG00000000693 | 104   | 36   | 311   | 233   | 87    | 12   | 196   | 70   |
| Lum                          | ENSMUSG00000036446 | 1447  | 238  | 3824  | 2686  | 1553  | 192  | 2795  | 564  |
| Matn2                        | ENSMUSG00000022324 | 417   | 57   | 667   | 192   | 429   | 35   | 559   | 39   |
| Mfap2                        | ENSMUSG00000060572 | 20    | 2    | 69    | 61    | 23    | 4    | 41    | 14   |
| Mfap3                        | ENSMUSG00000020522 | 454   | 25   | 541   | 33    | 431   | 20   | 503   | 22   |
| Mfap3l                       | ENSMUSG00000031647 | 512   | 38   | 351   | 27    | 511   | 51   | 378   | 15   |
| Mfap4                        | ENSMUSG00000042436 | 202   | 18   | 1249  | 1153  | 245   | 36   | 712   | 324  |
| Mfap5                        | ENSMUSG00000030116 | 411   | 43   | 1634  | 1033  | 404   | 45   | 1132  | 430  |
| Mgp                          | ENSMUSG00000030218 | 1671  | 257  | 3299  | 1832  | 1627  | 149  | 2424  | 267  |
| Mxra7                        | ENSMUSG00000020814 | 353   | 43   | 549   | 114   | 334   | 33   | 485   | 81   |
| Mxra8                        | ENSMUSG00000029070 | 431   | 61   | 782   | 329   | 511   | 145  | 714   | 119  |
| Nid1                         | ENSMUSG00000005397 | 3926  | 530  | 6347  | 1387  | 3634  | 332  | 5323  | 725  |
| Nid2                         | ENSMUSG00000021806 | 561   | 130  | 914   | 118   | 537   | 62   | 895   | 114  |
| Ntn1                         | ENSMUSG00000020902 | 1895  | 146  | 1435  | 153   | 2064  | 197  | 1793  | 251  |
| P3h1                         | ENSMUSG00000028641 | 217   | 25   | 313   | 43    | 242   | 18   | 308   | 55   |
| P3h3                         | ENSMUSG00000023191 | 185   | 14   | 319   | 100   | 179   | 28   | 278   | 54   |
| P4ha3                        | ENSMUSG00000051048 | 2     | 2    | 23    | 32    | 1     | 1    | 11    | 10   |
| Pcolce                       | ENSMUSG00000029718 | 778   | 81   | 1236  | 178   | 675   | 91   | 1133  | 173  |
| Pcolce2                      | ENSMUSG00000015354 | 412   | 82   | 494   | 81    | 352   | 55   | 503   | 72   |
| Plod3                        | ENSMUSG00000004846 | 475   | 118  | 658   | 87    | 472   | 51   | 605   | 62   |
| Postn                        | ENSMUSG00000027750 | 1288  | 354  | 16369 | 19036 | 1325  | 317  | 10262 | 8108 |
| Prg4                         | ENSMUSG00000006014 | 323   | 89   | 484   | 130   | 321   | 33   | 596   | 281  |
| Sparc                        | ENSMUSG00000018593 | 7512  | 635  | 18831 | 6579  | 7355  | 933  | 14409 | 2942 |
| Vcan                         | ENSMUSG00000021614 | 730   | 115  | 1503  | 151   | 665   | 105  | 1354  | 355  |
|                              |                    |       |      |       |       |       |      |       |      |
| <b>Interferon signalling</b> |                    |       |      |       |       |       |      |       |      |
| Ifi203                       | ENSMUSG00000039997 | 891   | 161  | 1230  | 255   | 880   | 117  | 940   | 84   |
| Ifi204                       | ENSMUSG00000073489 | 206   | 34   | 433   | 95    | 196   | 40   | 334   | 43   |
| Ifi209                       | ENSMUSG00000043263 | 52    | 15   | 126   | 69    | 50    | 17   | 92    | 45   |
| Ifi211                       | ENSMUSG00000026536 | 185   | 36   | 351   | 104   | 178   | 18   | 256   | 21   |
| Ifi27l2a                     | ENSMUSG00000079017 | 237   | 35   | 439   | 84    | 218   | 39   | 420   | 49   |
| Ifi30                        | ENSMUSG00000031838 | 101   | 27   | 193   | 76    | 87    | 20   | 127   | 31   |
| Ifih1                        | ENSMUSG00000026896 | 299   | 32   | 446   | 46    | 329   | 56   | 378   | 53   |
| Ifit1                        | ENSMUSG00000034459 | 187   | 43   | 329   | 102   | 161   | 24   | 234   | 21   |
| Ifit2                        | ENSMUSG00000045932 | 547   | 92   | 934   | 140   | 539   | 58   | 669   | 52   |
| Ifit3                        | ENSMUSG00000074896 | 336   | 93   | 626   | 210   | 311   | 45   | 430   | 29   |
| Ifit3b                       | ENSMUSG00000062488 | 122   | 30   | 208   | 57    | 123   | 22   | 150   | 9    |
| Ifitm2                       | ENSMUSG00000060591 | 875   | 131  | 1176  | 80    | 841   | 117  | 1097  | 135  |
| Ifitm3                       | ENSMUSG00000025492 | 1226  | 258  | 1689  | 136   | 1126  | 147  | 1515  | 182  |
| Ifngr1                       | ENSMUSG00000020009 | 1109  | 126  | 1400  | 78    | 1101  | 128  | 1324  | 109  |
| Irf5                         | ENSMUSG00000029771 | 73    | 13   | 148   | 22    | 78    | 12   | 119   | 35   |
| Irf7                         | ENSMUSG00000025498 | 220   | 65   | 413   | 114   | 189   | 26   | 332   | 52   |
| Irf8                         | ENSMUSG00000041515 | 118   | 13   | 229   | 76    | 128   | 21   | 193   | 26   |
| Isg20                        | ENSMUSG00000039236 | 86    | 30   | 130   | 16    | 102   | 27   | 144   | 32   |
|                              |                    |       |      |       |       |       |      |       |      |
| <b>Mitochondria</b>          |                    |       |      |       |       |       |      |       |      |
| Acaa2                        | ENSMUSG00000036880 | 13252 | 1380 | 8259  | 2391  | 12324 | 1059 | 9258  | 1215 |
| Aco2                         | ENSMUSG00000022477 | 41047 | 2512 | 30674 | 4778  | 41075 | 2487 | 35785 | 2269 |
| Afg1l                        | ENSMUSG00000038302 | 1113  | 135  | 844   | 176   | 1027  | 95   | 958   | 51   |
| Aldh2                        | ENSMUSG00000029455 | 3628  | 278  | 2621  | 303   | 3753  | 239  | 3023  | 178  |
| Atp5a1                       | ENSMUSG00000025428 | 73890 | 5007 | 52519 | 8597  | 73310 | 4969 | 61155 | 3605 |
| Atp5b                        | ENSMUSG00000025393 | 81983 | 4027 | 60525 | 7907  | 80175 | 3926 | 68956 | 5579 |
| Atp5d                        | ENSMUSG00000003072 | 5810  | 313  | 4470  | 769   | 5730  | 539  | 5074  | 535  |
| Atp5e                        | ENSMUSG00000016252 | 4682  | 460  | 3624  | 408   | 4707  | 229  | 4130  | 508  |
| Atp5g3                       | ENSMUSG00000018770 | 18004 | 1331 | 13448 | 2291  | 18271 | 996  | 15327 | 1271 |
| Atp5o                        | ENSMUSG00000022956 | 14204 | 841  | 11103 | 1882  | 13615 | 536  | 12332 | 665  |
| Bcat2                        | ENSMUSG00000030826 | 1208  | 96   | 917   | 126   | 1160  | 104  | 1012  | 77   |
| Cars2                        | ENSMUSG00000056228 | 540   | 40   | 408   | 58    | 563   | 48   | 458   | 53   |
| Clpp                         | ENSMUSG00000002660 | 608   | 48   | 457   | 72    | 598   | 7    | 499   | 95   |
| Clpx                         | ENSMUSG00000015357 | 2210  | 180  | 1776  | 257   | 2247  | 186  | 1932  | 167  |
| Cluh                         | ENSMUSG00000020741 | 5745  | 385  | 4121  | 818   | 6093  | 799  | 5032  | 263  |
| Coq10a                       | ENSMUSG00000039914 | 3593  | 171  | 2600  | 450   | 3601  | 150  | 3083  | 271  |
| Coq2                         | ENSMUSG00000029319 | 1358  | 71   | 1066  | 109   | 1353  | 65   | 1154  | 62   |
| Coq7                         | ENSMUSG00000030652 | 1122  | 100  | 786   | 155   | 1106  | 99   | 884   | 88   |

|         |                    |        |        |        |        |        |        |        |        |
|---------|--------------------|--------|--------|--------|--------|--------|--------|--------|--------|
| Coq8a   | ENSMUSG00000026489 | 8867   | 811    | 6241   | 1021   | 9606   | 1491   | 7168   | 332    |
| Coq9    | ENSMUSG00000031782 | 6190   | 445    | 4627   | 906    | 6154   | 410    | 5544   | 503    |
| Cox4i1  | ENSMUSG00000031818 | 22284  | 812    | 17754  | 1611   | 22070  | 1141   | 19696  | 1055   |
| Cox5a   | ENSMUSG00000000088 | 11595  | 608    | 8951   | 1587   | 11127  | 414    | 10060  | 740    |
| Cox5b   | ENSMUSG00000061518 | 10424  | 672    | 8385   | 1343   | 10221  | 301    | 9039   | 577    |
| Cox7a1  | ENSMUSG00000074218 | 8954   | 697    | 6119   | 1540   | 8610   | 451    | 7040   | 827    |
| Cox8b   | ENSMUSG00000025488 | 6504   | 621    | 4961   | 1023   | 6394   | 477    | 5556   | 903    |
| Cs      | ENSMUSG00000005683 | 24899  | 2214   | 17482  | 3393   | 24790  | 1691   | 20831  | 1885   |
| Decr1   | ENSMUSG00000028223 | 8479   | 863    | 5924   | 1566   | 7835   | 344    | 6512   | 520    |
| Diablo  | ENSMUSG00000029433 | 1178   | 83     | 980    | 91     | 1146   | 35     | 1105   | 48     |
| Dlst    | ENSMUSG00000004789 | 11654  | 750    | 8617   | 1895   | 11270  | 555    | 10153  | 788    |
| Echs1   | ENSMUSG00000025465 | 4828   | 268    | 3779   | 465    | 4896   | 284    | 4167   | 357    |
| Etfa    | ENSMUSG00000032314 | 11167  | 800    | 7804   | 1484   | 10775  | 533    | 8929   | 812    |
| Etfb    | ENSMUSG00000004610 | 8827   | 431    | 6069   | 1637   | 8450   | 419    | 6927   | 725    |
| Etfdh   | ENSMUSG00000027809 | 13588  | 811    | 9757   | 2314   | 12812  | 772    | 10703  | 771    |
| Fh1     | ENSMUSG00000026526 | 7500   | 576    | 5659   | 1050   | 7018   | 180    | 6388   | 586    |
| Fmc1    | ENSMUSG00000019689 | 622    | 55     | 458    | 87     | 580    | 55     | 484    | 71     |
| Gfm1    | ENSMUSG00000027774 | 4053   | 240    | 3035   | 442    | 3973   | 430    | 3372   | 259    |
| Gfm2    | ENSMUSG00000021666 | 1266   | 144    | 1001   | 118    | 1229   | 127    | 1128   | 100    |
| Got2    | ENSMUSG00000031672 | 15403  | 947    | 11510  | 1822   | 15607  | 1320   | 13207  | 1045   |
| Gpd2    | ENSMUSG00000026827 | 401    | 24     | 334    | 32     | 392    | 48     | 398    | 25     |
| Hccs    | ENSMUSG00000031352 | 997    | 84     | 858    | 98     | 1041   | 148    | 890    | 60     |
| Iars2   | ENSMUSG00000026618 | 2409   | 99     | 1873   | 136    | 2398   | 100    | 2171   | 120    |
| Idh2    | ENSMUSG00000030541 | 25832  | 1566   | 18548  | 3665   | 26906  | 2049   | 21457  | 2197   |
| Idh3a   | ENSMUSG00000032279 | 10211  | 1028   | 7707   | 867    | 10029  | 629    | 8753   | 799    |
| Idh3b   | ENSMUSG00000027406 | 11455  | 1144   | 8621   | 1973   | 11227  | 459    | 9312   | 738    |
| Idh3g   | ENSMUSG00000002010 | 6376   | 459    | 4785   | 580    | 6418   | 422    | 4954   | 479    |
| Immt    | ENSMUSG00000052337 | 11137  | 723    | 8672   | 1433   | 10924  | 555    | 9873   | 547    |
| Lonpl   | ENSMUSG00000041168 | 2317   | 80     | 2025   | 163    | 2376   | 150    | 2252   | 87     |
| Malsu1  | ENSMUSG00000029815 | 281    | 28     | 208    | 15     | 260    | 23     | 236    | 30     |
| Mars2   | ENSMUSG00000046994 | 370    | 47     | 284    | 34     | 364    | 34     | 304    | 25     |
| Mcub    | ENSMUSG00000027994 | 41     | 14     | 77     | 15     | 37     | 4      | 50     | 10     |
| Mdh2    | ENSMUSG00000019179 | 16876  | 703    | 12970  | 2129   | 16369  | 1034   | 14499  | 734    |
| Me3     | ENSMUSG00000030621 | 1244   | 36     | 938    | 86     | 1271   | 81     | 1046   | 52     |
| Mfn1    | ENSMUSG00000027668 | 8217   | 628    | 6382   | 1129   | 8242   | 170    | 7059   | 753    |
| Mfn2    | ENSMUSG00000029020 | 15414  | 955    | 11184  | 2042   | 15810  | 1644   | 13241  | 705    |
| Mgme1   | ENSMUSG00000027424 | 350    | 28     | 255    | 46     | 337    | 12     | 267    | 30     |
| Miga1   | ENSMUSG00000054942 | 412    | 61     | 323    | 8      | 409    | 40     | 383    | 35     |
| Mipep   | ENSMUSG00000021993 | 1364   | 63     | 983    | 167    | 1394   | 126    | 1103   | 71     |
| Mpv17   | ENSMUSG00000107283 | 1098   | 32     | 873    | 90     | 1118   | 80     | 934    | 104    |
| Mrpl14  | ENSMUSG00000023939 | 682    | 54     | 516    | 77     | 739    | 35     | 586    | 87     |
| Mrpl16  | ENSMUSG00000024683 | 961    | 36     | 784    | 75     | 930    | 52     | 848    | 97     |
| Mrpl28  | ENSMUSG00000024181 | 1210   | 39     | 882    | 132    | 1171   | 81     | 1020   | 121    |
| Mrpl37  | ENSMUSG00000028622 | 1184   | 43     | 904    | 135    | 1161   | 34     | 1046   | 74     |
| Mrpl38  | ENSMUSG00000020775 | 704    | 31     | 534    | 72     | 674    | 41     | 611    | 58     |
| Mrpl39  | ENSMUSG00000022889 | 1365   | 91     | 1053   | 180    | 1335   | 40     | 1087   | 56     |
| Mrpl4   | ENSMUSG00000003299 | 1028   | 38     | 792    | 138    | 1029   | 93     | 915    | 137    |
| Mrpl45  | ENSMUSG00000018882 | 1187   | 97     | 837    | 153    | 1100   | 58     | 1043   | 54     |
| Mrps26  | ENSMUSG00000037740 | 355    | 39     | 258    | 24     | 351    | 18     | 326    | 26     |
| Mrps35  | ENSMUSG00000040112 | 1312   | 76     | 991    | 219    | 1236   | 59     | 1132   | 63     |
| Mrps6   | ENSMUSG00000039680 | 361    | 20     | 285    | 16     | 354    | 19     | 300    | 4      |
| mt-Nd2  | ENSMUSG00000064345 | 563587 | 132806 | 437281 | 99302  | 600917 | 101879 | 466929 | 126476 |
| mt-Nd5  | ENSMUSG00000064367 | 810634 | 162252 | 639879 | 106231 | 854483 | 106054 | 682450 | 132819 |
| mt-Rnr2 | ENSMUSG00000064339 | 356240 | 61989  | 247940 | 69255  | 362883 | 53161  | 276407 | 38517  |
| Mtfp1   | ENSMUSG00000004748 | 1636   | 82     | 1103   | 322    | 1626   | 114    | 1320   | 90     |
| Mtfr11  | ENSMUSG00000046671 | 2563   | 65     | 2169   | 189    | 2622   | 122    | 2390   | 105    |
| Mtg2    | ENSMUSG00000039069 | 366    | 31     | 275    | 26     | 387    | 9      | 312    | 16     |
| Mto1    | ENSMUSG00000032342 | 481    | 27     | 368    | 46     | 450    | 40     | 405    | 41     |
| Nadk2   | ENSMUSG00000022253 | 1247   | 102    | 792    | 168    | 1254   | 222    | 893    | 160    |
| Ndufa10 | ENSMUSG00000026260 | 9566   | 706    | 7436   | 1132   | 9920   | 331    | 8450   | 886    |
| Ndufa8  | ENSMUSG00000026895 | 4878   | 294    | 3771   | 635    | 4757   | 148    | 4279   | 331    |
| Ndufa9  | ENSMUSG00000000399 | 9480   | 996    | 7084   | 1337   | 9287   | 369    | 7867   | 703    |
| Ndufs1  | ENSMUSG00000025968 | 15975  | 1815   | 11734  | 2163   | 15650  | 1579   | 13236  | 1027   |
| Ndufs2  | ENSMUSG00000013593 | 16031  | 729    | 11634  | 1773   | 15858  | 991    | 13476  | 1336   |
| Ndufs3  | ENSMUSG00000005510 | 6047   | 349    | 4620   | 872    | 5917   | 121    | 5197   | 447    |
| Ndufs7  | ENSMUSG00000020153 | 3525   | 187    | 2485   | 513    | 3595   | 317    | 2923   | 370    |
| Ndufv1  | ENSMUSG00000037916 | 9773   | 762    | 6974   | 1216   | 9669   | 615    | 8148   | 626    |

|                   |                    |       |      |       |       |       |      |       |       |
|-------------------|--------------------|-------|------|-------|-------|-------|------|-------|-------|
| Ogdh              | ENSMUSG00000020456 | 39640 | 2492 | 29734 | 4328  | 41635 | 5116 | 35518 | 902   |
| Opal              | ENSMUSG00000038084 | 5644  | 514  | 4210  | 706   | 5735  | 550  | 5001  | 562   |
| Oxa1l             | ENSMUSG00000000959 | 1341  | 57   | 1036  | 150   | 1356  | 195  | 1142  | 95    |
| Oxct1             | ENSMUSG00000022186 | 26538 | 1570 | 20521 | 2412  | 25456 | 2358 | 23051 | 1272  |
| Oxsm              | ENSMUSG00000021786 | 592   | 47   | 470   | 26    | 633   | 71   | 520   | 20    |
| Pdf               | ENSMUSG00000078931 | 565   | 42   | 418   | 72    | 575   | 29   | 492   | 19    |
| Pdha1             | ENSMUSG00000031299 | 24973 | 2883 | 19882 | 1983  | 24844 | 2183 | 21298 | 1610  |
| Pdk2              | ENSMUSG00000038967 | 7045  | 426  | 4922  | 991   | 7351  | 661  | 5815  | 537   |
| Pdk3              | ENSMUSG00000035232 | 44    | 14   | 83    | 17    | 53    | 21   | 69    | 7     |
| Pdp1              | ENSMUSG00000049225 | 1052  | 157  | 827   | 97    | 1038  | 87   | 873   | 99    |
| Pdp2              | ENSMUSG00000048371 | 822   | 182  | 433   | 87    | 839   | 116  | 560   | 111   |
| Pdpr              | ENSMUSG00000033624 | 2409  | 176  | 1771  | 254   | 2523  | 330  | 2118  | 147   |
| Pmpca             | ENSMUSG00000026926 | 2809  | 172  | 2292  | 228   | 2800  | 157  | 2538  | 100   |
| Sdha              | ENSMUSG00000021577 | 26565 | 1713 | 17836 | 2991  | 26775 | 2129 | 20539 | 1624  |
| Sdhb              | ENSMUSG00000009863 | 12188 | 749  | 9065  | 1722  | 11819 | 503  | 9978  | 990   |
| Sdhc              | ENSMUSG00000058076 | 7127  | 66   | 5010  | 729   | 7101  | 434  | 5730  | 395   |
| Sfxn3             | ENSMUSG00000025212 | 216   | 19   | 310   | 29    | 224   | 5    | 272   | 31    |
| Slc25a11          | ENSMUSG00000014606 | 8077  | 561  | 5928  | 1242  | 7992  | 341  | 6986  | 662   |
| Slc25a12          | ENSMUSG00000027010 | 4184  | 351  | 2893  | 395   | 4194  | 379  | 3611  | 151   |
| Slc25a13          | ENSMUSG00000015112 | 2989  | 324  | 2199  | 145   | 3029  | 276  | 2574  | 268   |
| Slc25a20          | ENSMUSG00000032602 | 3086  | 349  | 2262  | 477   | 3063  | 140  | 2521  | 210   |
| Slc25a22          | ENSMUSG00000019082 | 545   | 113  | 458   | 107   | 575   | 57   | 418   | 70    |
| Slc25a24          | ENSMUSG00000040322 | 184   | 16   | 278   | 63    | 197   | 22   | 246   | 35    |
| Slc25a3           | ENSMUSG00000061904 | 25015 | 1211 | 18063 | 2479  | 25124 | 1400 | 20806 | 1485  |
| Sod2              | ENSMUSG00000006818 | 12266 | 831  | 8665  | 1885  | 11982 | 506  | 9979  | 664   |
| Suclg1            | ENSMUSG00000052738 | 6364  | 514  | 4599  | 1021  | 6012  | 279  | 5327  | 363   |
| Suclg2            | ENSMUSG00000061838 | 4105  | 321  | 2961  | 428   | 4037  | 119  | 3294  | 228   |
| Tars2             | ENSMUSG00000028107 | 667   | 59   | 489   | 66    | 606   | 23   | 549   | 66    |
| Tcaim             | ENSMUSG00000046603 | 1091  | 140  | 752   | 164   | 1078  | 129  | 865   | 134   |
| Tufm              | ENSMUSG00000073838 | 3132  | 215  | 2311  | 479   | 3147  | 191  | 2714  | 265   |
| Twnc              | ENSMUSG00000025209 | 604   | 21   | 452   | 67    | 607   | 59   | 505   | 23    |
| Ucp3              | ENSMUSG00000032942 | 1264  | 355  | 659   | 227   | 1281  | 331  | 698   | 271   |
| Uqcc1             | ENSMUSG00000005882 | 3454  | 270  | 2476  | 553   | 3363  | 150  | 2909  | 228   |
| Uqerc1            | ENSMUSG00000025651 | 15130 | 710  | 10190 | 2080  | 15168 | 907  | 12233 | 1293  |
| Uqcrfs1           | ENSMUSG00000038462 | 13197 | 914  | 10056 | 1838  | 12772 | 692  | 11183 | 890   |
| Vdac1             | ENSMUSG00000020402 | 17517 | 801  | 13326 | 1578  | 17010 | 633  | 14751 | 342   |
| Vdac3             | ENSMUSG00000008892 | 6247  | 446  | 4930  | 675   | 5939  | 119  | 5490  | 330   |
|                   |                    |       |      |       |       |       |      |       |       |
|                   |                    |       |      |       |       |       |      |       |       |
| <b>Structural</b> |                    |       |      |       |       |       |      |       |       |
| Acta1             | ENSMUSG00000031972 | 6773  | 1395 | 24772 | 10833 | 8570  | 3863 | 28601 | 14894 |
| Actb              | ENSMUSG00000029580 | 7471  | 1804 | 10178 | 1677  | 7763  | 1384 | 9365  | 1200  |
| Actg1             | ENSMUSG00000062825 | 6824  | 1047 | 8916  | 1194  | 7413  | 1015 | 8405  | 1266  |
| Actg2             | ENSMUSG00000059430 | 11    | 6    | 37    | 14    | 12    | 6    | 20    | 12    |
| Actn1             | ENSMUSG00000015143 | 522   | 79   | 925   | 273   | 524   | 61   | 761   | 132   |
| Actn4             | ENSMUSG00000054808 | 2213  | 272  | 2742  | 211   | 2012  | 203  | 2417  | 171   |
| Actr2             | ENSMUSG00000020152 | 2099  | 200  | 2493  | 267   | 2101  | 71   | 2352  | 201   |
| Actr3             | ENSMUSG00000026341 | 2536  | 120  | 3001  | 264   | 2399  | 43   | 2908  | 199   |
| Agm               | ENSMUSG00000041936 | 958   | 125  | 1295  | 154   | 947   | 79   | 1136  | 70    |
| Aif1              | ENSMUSG00000024397 | 63    | 12   | 133   | 73    | 51    | 11   | 95    | 13    |
| Ank2              | ENSMUSG00000032826 | 3236  | 377  | 2426  | 262   | 3245  | 406  | 2934  | 430   |
| Ankrd1            | ENSMUSG00000024803 | 20150 | 6483 | 57246 | 17002 | 19310 | 6244 | 49450 | 10874 |
| Ankrd23           | ENSMUSG00000067653 | 8223  | 1670 | 13521 | 3447  | 9104  | 579  | 14731 | 4085  |
| Anks1             | ENSMUSG00000024219 | 1418  | 123  | 1011  | 201   | 1347  | 177  | 1118  | 141   |
| Anln              | ENSMUSG00000036777 | 56    | 22   | 225   | 55    | 56    | 7    | 174   | 50    |
| Arpc1b            | ENSMUSG00000029622 | 814   | 81   | 1186  | 179   | 737   | 113  | 1071  | 150   |
| Arpc2             | ENSMUSG00000006304 | 2337  | 43   | 2757  | 185   | 2338  | 47   | 2652  | 121   |
| Arpc3             | ENSMUSG00000029465 | 1134  | 39   | 1490  | 168   | 1115  | 115  | 1392  | 88    |
| Arpc5             | ENSMUSG00000008475 | 864   | 45   | 1233  | 156   | 871   | 66   | 1121  | 40    |
| Arpin             | ENSMUSG00000039043 | 239   | 19   | 299   | 19    | 258   | 25   | 280   | 26    |
| Cald1             | ENSMUSG00000029761 | 1649  | 323  | 2616  | 191   | 1624  | 256  | 2205  | 422   |
| Capg              | ENSMUSG00000056737 | 183   | 29   | 364   | 36    | 182   | 36   | 328   | 70    |
| Capza1            | ENSMUSG00000070372 | 1251  | 78   | 1608  | 138   | 1166  | 148  | 1428  | 124   |
| Cfl1              | ENSMUSG00000056201 | 2052  | 87   | 2670  | 304   | 1872  | 236  | 2490  | 204   |
| Cilp              | ENSMUSG00000042254 | 294   | 76   | 3092  | 3273  | 401   | 134  | 2249  | 1515  |
| Ckap2             | ENSMUSG00000037725 | 33    | 16   | 131   | 46    | 25    | 5    | 95    | 45    |
| Ckap2l            | ENSMUSG00000048327 | 30    | 10   | 123   | 39    | 25    | 8    | 110   | 29    |
| Ckap4             | ENSMUSG00000046841 | 756   | 159  | 1094  | 75    | 815   | 103  | 1104  | 165   |



|          |                    |        |       |        |       |        |       |        |       |
|----------|--------------------|--------|-------|--------|-------|--------|-------|--------|-------|
| Cnn1     | ENSMUSG00000001349 | 37     | 23    | 130    | 75    | 42     | 17    | 53     | 24    |
| Cnn2     | ENSMUSG00000004665 | 793    | 93    | 1039   | 52    | 856    | 80    | 1002   | 98    |
| Cnn3     | ENSMUSG00000053931 | 1009   | 125   | 1438   | 123   | 955    | 121   | 1319   | 119   |
| Coro1a   | ENSMUSG00000030707 | 175    | 29    | 270    | 73    | 171    | 24    | 228    | 26    |
| Coro1b   | ENSMUSG00000024835 | 688    | 47    | 858    | 53    | 695    | 47    | 802    | 76    |
| Cotl1    | ENSMUSG00000031827 | 234    | 40    | 369    | 66    | 208    | 50    | 335    | 22    |
| Csrp1    | ENSMUSG00000026421 | 868    | 80    | 1281   | 109   | 889    | 121   | 1075   | 145   |
| Csrp2    | ENSMUSG00000020186 | 180    | 37    | 542    | 354   | 165    | 20    | 315    | 127   |
| Ctnn     | ENSMUSG00000031078 | 793    | 94    | 1056   | 113   | 811    | 56    | 962    | 95    |
| Dbn1     | ENSMUSG00000034675 | 170    | 35    | 385    | 71    | 169    | 25    | 330    | 74    |
| Dbnl     | ENSMUSG00000020476 | 472    | 46    | 575    | 30    | 501    | 31    | 573    | 37    |
| Emilin1  | ENSMUSG00000029163 | 473    | 106   | 835    | 204   | 519    | 28    | 812    | 91    |
| Eml2     | ENSMUSG00000040811 | 379    | 40    | 285    | 35    | 408    | 44    | 337    | 30    |
| Eml5     | ENSMUSG00000051166 | 129    | 41    | 106    | 30    | 156    | 42    | 80     | 35    |
| Enah     | ENSMUSG00000022995 | 2820   | 352   | 4077   | 860   | 3138   | 213   | 4243   | 467   |
| Fscn1    | ENSMUSG00000029581 | 817    | 47    | 1186   | 92    | 831    | 115   | 1140   | 241   |
| Ift122   | ENSMUSG00000030323 | 278    | 32    | 496    | 94    | 309    | 39    | 488    | 78    |
| Ift81    | ENSMUSG00000029469 | 1002   | 129   | 666    | 78    | 994    | 49    | 708    | 78    |
| Jpt1     | ENSMUSG00000020737 | 841    | 76    | 987    | 49    | 790    | 37    | 1002   | 107   |
| Jpt2     | ENSMUSG00000024165 | 169    | 19    | 197    | 35    | 141    | 33    | 226    | 44    |
| Map10    | ENSMUSG00000050930 | 149    | 21    | 98     | 15    | 151    | 17    | 112    | 10    |
| Map1b    | ENSMUSG00000052727 | 582    | 102   | 873    | 51    | 444    | 82    | 777    | 113   |
| Map11c3a | ENSMUSG00000027602 | 4603   | 222   | 3864   | 305   | 4713   | 378   | 4049   | 447   |
| Map6     | ENSMUSG00000055407 | 108    | 31    | 142    | 36    | 87     | 9     | 129    | 34    |
| Mapre1   | ENSMUSG00000027479 | 1639   | 151   | 1876   | 92    | 1651   | 91    | 1859   | 64    |
| Msn      | ENSMUSG00000031207 | 4381   | 327   | 6174   | 266   | 4286   | 400   | 5734   | 498   |
| Mybpc2   | ENSMUSG00000038670 | 292    | 36    | 901    | 354   | 321    | 110   | 773    | 309   |
| Myh10    | ENSMUSG00000020900 | 964    | 132   | 1462   | 186   | 988    | 96    | 1366   | 213   |
| Myh14    | ENSMUSG00000030739 | 1825   | 190   | 1436   | 214   | 1992   | 381   | 1613   | 123   |
| Myh6     | ENSMUSG00000040752 | 416670 | 31586 | 295124 | 67491 | 432469 | 60382 | 365274 | 31724 |
| Myh7     | ENSMUSG00000053093 | 1672   | 510   | 20844  | 27743 | 2490   | 1006  | 11438  | 8811  |
| Myh9     | ENSMUSG00000022443 | 4467   | 917   | 6229   | 813   | 4465   | 679   | 5733   | 609   |
| Myl1     | ENSMUSG00000061816 | 777    | 84    | 1354   | 639   | 674    | 113   | 1186   | 282   |
| Myl6     | ENSMUSG00000090841 | 3039   | 174   | 4606   | 743   | 2959   | 365   | 4098   | 492   |
| Myl9     | ENSMUSG00000067818 | 507    | 113   | 744    | 105   | 504    | 152   | 536    | 41    |
| Mylip    | ENSMUSG00000038175 | 408    | 59    | 322    | 55    | 361    | 21    | 336    | 42    |
| Myo1c    | ENSMUSG00000017774 | 2939   | 140   | 3445   | 280   | 2807   | 136   | 3414   | 203   |
| Myo1d    | ENSMUSG00000035441 | 367    | 44    | 489    | 47    | 360    | 56    | 474    | 39    |
| Myo1e    | ENSMUSG00000032220 | 382    | 52    | 541    | 82    | 377    | 40    | 487    | 59    |
| Myo1f    | ENSMUSG00000024300 | 97     | 11    | 170    | 34    | 88     | 10    | 163    | 43    |
| Myo1g    | ENSMUSG00000020437 | 50     | 9     | 89     | 21    | 55     | 12    | 90     | 33    |
| Myo5a    | ENSMUSG00000034593 | 359    | 55    | 615    | 165   | 371    | 102   | 518    | 152   |
| Myo5c    | ENSMUSG00000033590 | 102    | 18    | 90     | 31    | 150    | 35    | 66     | 21    |
| Myof     | ENSMUSG00000048612 | 346    | 89    | 640    | 167   | 312    | 56    | 541    | 78    |
| Nes      | ENSMUSG00000004891 | 1779   | 216   | 2677   | 688   | 1621   | 280   | 2378   | 347   |
| Pfn1     | ENSMUSG00000018293 | 2349   | 50    | 2712   | 75    | 2362   | 104   | 2642   | 191   |
| Sgcb     | ENSMUSG00000029156 | 2725   | 146   | 2351   | 41    | 2817   | 190   | 2512   | 150   |
| Sgce     | ENSMUSG00000004631 | 294    | 28    | 387    | 53    | 287    | 38    | 342    | 18    |
| Smarcd1  | ENSMUSG00000023018 | 561    | 16    | 444    | 69    | 610    | 82    | 467    | 65    |
| Sntb2    | ENSMUSG00000041308 | 632    | 76    | 913    | 145   | 638    | 68    | 853    | 99    |
| Sptb     | ENSMUSG00000021061 | 3814   | 253   | 2892   | 391   | 4015   | 448   | 3358   | 226   |
| Tagln    | ENSMUSG00000032085 | 483    | 160   | 931    | 216   | 458    | 122   | 542    | 128   |
| Tagln2   | ENSMUSG00000026547 | 1222   | 205   | 1863   | 181   | 1131   | 206   | 1710   | 250   |
| Tcap     | ENSMUSG00000007877 | 15023  | 5676  | 9524   | 3481  | 11808  | 3513  | 10365  | 2562  |
| Tln1     | ENSMUSG00000028465 | 3433   | 355   | 4129   | 304   | 3528   | 301   | 4361   | 274   |
| Tmod1    | ENSMUSG00000028328 | 6866   | 511   | 5456   | 542   | 6671   | 424   | 6180   | 413   |
| Tmod4    | ENSMUSG00000005628 | 378    | 37    | 254    | 60    | 361    | 43    | 317    | 59    |
| Tnni3    | ENSMUSG00000035458 | 63108  | 4479  | 42722  | 10485 | 61514  | 1321  | 48873  | 5226  |
| Tnnt2    | ENSMUSG00000026414 | 110161 | 8926  | 87055  | 9068  | 105408 | 3834  | 92241  | 8335  |
| Tnnt3    | ENSMUSG00000061723 | 6      | 2     | 29     | 39    | 5      | 3     | 17     | 17    |
| Tpm2     | ENSMUSG00000028464 | 338    | 60    | 565    | 58    | 358    | 58    | 477    | 79    |
| Tpm3     | ENSMUSG00000027940 | 1515   | 192   | 2133   | 211   | 1390   | 166   | 1854   | 103   |
| Tpm4     | ENSMUSG00000031799 | 3181   | 181   | 4770   | 635   | 3020   | 369   | 4360   | 322   |
| Ttll1    | ENSMUSG00000022442 | 921    | 104   | 531    | 110   | 965    | 54    | 680    | 86    |
| Tuba1a   | ENSMUSG00000072235 | 1839   | 223   | 2349   | 176   | 1762   | 189   | 2229   | 379   |
| Tubb2a   | ENSMUSG00000058672 | 572    | 55    | 703    | 94    | 505    | 25    | 707    | 148   |
| Tubb2b   | ENSMUSG00000045136 | 49     | 15    | 127    | 28    | 62     | 34    | 105    | 43    |

|       |                     |       |      |       |       |       |      |       |       |
|-------|---------------------|-------|------|-------|-------|-------|------|-------|-------|
| Tubb5 | ENSMUSG00000001525  | 1852  | 114  | 2383  | 316   | 1680  | 188  | 2353  | 298   |
| Tubb6 | ENSMUSG00000001473  | 337   | 29   | 445   | 93    | 318   | 39   | 459   | 50    |
| Vim   | ENSMUSG00000026728  | 3763  | 407  | 7380  | 1381  | 3521  | 520  | 6206  | 983   |
| Was   | ENSMUSG000000031165 | 34    | 9    | 71    | 17    | 40    | 6    | 48    | 12    |
| Whrn  | ENSMUSG000000039137 | 481   | 110  | 307   | 100   | 542   | 79   | 382   | 97    |
| Wipf1 | ENSMUSG000000075284 | 572   | 54   | 783   | 47    | 562   | 70   | 635   | 43    |
| Wisp1 | ENSMUSG00000005124  | 27    | 8    | 174   | 241   | 30    | 12   | 82    | 66    |
| Xirp2 | ENSMUSG00000027022  | 23026 | 1933 | 46990 | 12463 | 24085 | 3291 | 47862 | 16560 |
| Zyx   | ENSMUSG00000029860  | 896   | 129  | 1214  | 76    | 876   | 143  | 1120  | 93    |

**Supplementary Table S10. Body weights of adult mice.** P values are for body weight after treatment with angiotensin II (AngII) for 7 d relative to baseline body weight (2-way ANOVA with Holm-Sidak's post-test) or for PKN2Het mice relative to wild-type (WT) mice at 42 weeks (t test). There were no significant differences between WT and PKN2Het mice at 12 weeks.

| 12 weeks        | Baseline body weight (g) |      |   | Body weight after 7 d AngII (g) |      |    | P value           |
|-----------------|--------------------------|------|---|---------------------------------|------|----|-------------------|
|                 | Mean                     | SEM  | n | Mean                            | SEM  | n  |                   |
| WT/Vehicle      | 28.18                    | 0.75 | 5 | 28.24                           | 0.72 | 5  | P=0.071           |
| PKN2Het/Vehicle | 28.25                    | 0.69 | 8 | 27.80                           | 0.80 | 7  | <b>P&lt;0.001</b> |
| WT/AngII        | 28.96                    | 0.72 | 5 | 28.74                           | 0.56 | 5  | P=0.6235          |
| PKN2/AngII      | 29.42                    | 0.76 | 8 | 28.47                           | 0.72 | 7  | P=0.1847          |
|                 |                          |      |   |                                 |      |    |                   |
| 42 weeks        | WT                       |      |   | PKN2Het                         |      |    |                   |
|                 | Mean                     | SEM  | n | Mean                            | SEM  | n  |                   |
|                 | 35.10                    | 1.40 | 8 | 37.24                           | 0.67 | 11 | p=0.151           |

**Supplementary Table S11. qPCR primers.**

| Gene  | Sense Primer (5'→3')     | Antisense Primer (5'→3') |
|-------|--------------------------|--------------------------|
| Gapdh | TCACCACCATGGAGAAGGC      | GCTAAGCAGTTGGTGGTGCA     |
| Myh7  | CATGCCAACCGTATGGCTG      | GTTCCACGATGGCGATGTC      |
| Nppa  | GATGGATTTCAAGAACCTGCTAGA | CTTCCTCAGTCTGCTCACTCA    |
| Nppb  | TCCAGCAGAGACCTCAAAATTC   | CAGTGCGTTACAGCCCAA       |
| Tagln | GACTGCACTTCTCGGCTCAT     | CCGAAGCTACTCTCCTTCCA     |

## Supplementary references

- 60 Banyasz, T., Lozinskiy, I., Payne, C. E., Edelmann, S., Norton, B., Chen, B., Chen-Izu, Y., Izu, L. T. and Balke, C. W. (2008) Transformation of adult rat cardiac myocytes in primary culture. *Exp Physiol.* **93**, 370-382
- 61 Cerbai, E., Pino, R., Sartiani, L. and Mugelli, A. (1999) Influence of postnatal-development on I(f) occurrence and properties in neonatal rat ventricular myocytes. *Cardiovasc Res.* **42**, 416-423
